# Supplementary material for: Design, synthesis and antifungal mechanism of novel acetophenone derivatives containing 1,3,4-thiadiazole-2-thioethers
Source: Royal Society of Chemistry journal article supplement (doi:10.1039/d2nj01709a), 2022-01-01
Supplement: d2nj01709a1.pdf [file d2nj01709a1.pdf]

## Supporting Information to the *New Journal of Chemistry*

### Design, synthesis and antifungal mechanism of novel acetophenone derivatives containing 1, 3, 4-thiadiazole-2-thioethers

Li Dou,<sup>a</sup> Huabin Shi,<sup>a</sup> Xue Niu,<sup>a, b</sup> Hong Zhang,<sup>a</sup> Kankan Zhang,<sup>a</sup> and Zhibing Wu<sup>\*a</sup>

<sup>a</sup>State Key Laboratory Breeding Base of Green Pesticide and Agricultural Bioengineering, Key Laboratory of Green Pesticide and Agricultural Bioengineering, Ministry of Education, Center for R&D of Fine Chemicals of Guizhou University, Guiyang, 550025, China.

<sup>b</sup>School of Chemistry and Chemical Engineering, Guizhou University, Guiyang, 550025, China.

\*Corresponding author

E-mail address: zbwu@gzu.edu.cn (Z.B. Wu)

#### Contents

|                                                                                                                |       |
|----------------------------------------------------------------------------------------------------------------|-------|
| 1. <sup>1</sup> H NMR, <sup>13</sup> C NMR, <sup>19</sup> F NMR and HRMS data of the title compounds.....      | 2-13  |
| 2. Copies of <sup>1</sup> H NMR, <sup>13</sup> C NMR, <sup>19</sup> F NMR and HRMS of the title compounds..... | 13-62 |
| 3. Crystallographic data of compound <b>E27</b> .....                                                          | 63-64 |
| 4. The regression equation of the title compounds with EC <sub>50</sub> values.....                            | 64-66 |

## 1. <sup>1</sup>H NMR, <sup>13</sup>C NMR, <sup>19</sup>F NMR and HRMS data of the title compounds

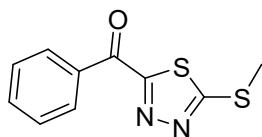

*Date for E1.* A yellow solid, yield 95%, m.p. 59-60 °C. <sup>1</sup>H NMR (400 MHz, CDCl<sub>3</sub>) δ: 8.52–8.49 (m, 2H, phenyl H), 7.69–7.64 (m, 1H, phenyl H), 7.55–7.51 (m, 2H, phenyl H), 2.87 (s, 3H, CH<sub>3</sub>); <sup>13</sup>C NMR (101 MHz, CDCl<sub>3</sub>) δ: 182.97, 173.53, 169.13, 134.53, 134.51, 131.28, 128.74, 16.63; HRMS (ESI): m/z calcd for C<sub>10</sub>H<sub>8</sub>N<sub>2</sub>OS<sub>2</sub> [M+H]<sup>+</sup> 237.01508, found 237.01466.

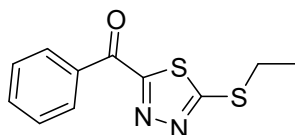

*Date for E2.* A yellow solid, yield 89%, m.p. 32-33 °C. <sup>1</sup>H NMR (400 MHz, CDCl<sub>3</sub>) δ: 8.52–8.49 (m, 2H, phenyl H), 7.68–7.63 (m, 1H, phenyl H), 7.54–7.50 (m, 2H, phenyl H), 3.43 (q, *J* = 8.0 Hz, 2H, CH<sub>2</sub>), 1.53 (t, *J* = 8.0 Hz, 3H, CH<sub>3</sub>); <sup>13</sup>C NMR (101 MHz, CDCl<sub>3</sub>) δ: 182.94, 172.74, 169.02, 134.57, 134.45, 131.25, 128.71, 28.71, 14.57; HRMS (ESI): m/z calcd for C<sub>11</sub>H<sub>10</sub>N<sub>2</sub>OS<sub>2</sub> [M+H]<sup>+</sup> 251.03073, found 251.03006.

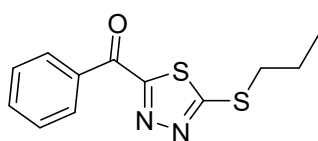

*Date for E3.* A yellow liquid, yield 90%. <sup>1</sup>H NMR (400 MHz, CDCl<sub>3</sub>) δ: 8.52–8.49 (m, 2H, phenyl H), 7.68–7.64 (m, 1H, phenyl H), 7.55–7.51 (m, phenyl H), 3.40 (t, *J* = 8.0 Hz, 2H, CH<sub>2</sub>CH<sub>2</sub>CH<sub>3</sub>), 1.95–1.85 (m, 2H, CH<sub>2</sub>CH<sub>2</sub>CH<sub>3</sub>), 1.09 (t, *J* = 8.0 Hz, 3H, CH<sub>2</sub>CH<sub>2</sub>CH<sub>3</sub>); <sup>13</sup>C NMR (101 MHz, CDCl<sub>3</sub>) δ: 182.97, 173.07, 168.96, 134.59, 134.46, 131.27, 128.72, 36.18, 22.64, 13.46; HRMS (ESI): m/z calcd for C<sub>12</sub>H<sub>12</sub>N<sub>2</sub>OS<sub>2</sub> [M+H]<sup>+</sup> 265.04638, found 265.04578.

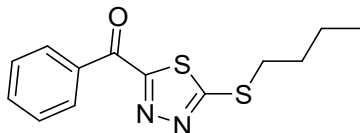

*Date for E4.* A orange-red solid, yield 88%, m.p. 32-33 °C.  $^1\text{H}$  NMR (400 MHz,  $\text{CDCl}_3$ )  $\delta$ : 8.52–8.49 (m, 2H, phenyl H), 7.68–7.64 (m, 1H, phenyl H), 7.55–7.51 (m, 2H, phenyl H), 3.42 (t,  $J = 8.0$  Hz, 2H,  $\text{CH}_2\text{CH}_2\text{CH}_2\text{CH}_3$ ), 1.88–1.81 (m, 2H,  $\text{CH}_2\text{CH}_2\text{CH}_2\text{CH}_3$ ), 1.56–1.46 (m, 2H,  $\text{CH}_2\text{CH}_2\text{CH}_2\text{CH}_3$ ), 0.97 (t,  $J = 8.0$  Hz, 3H,  $\text{CH}_2\text{CH}_2\text{CH}_2\text{CH}_3$ );  $^{13}\text{C}$  NMR (101 MHz,  $\text{CDCl}_3$ )  $\delta$ : 182.97, 173.11, 168.96, 134.59, 134.45, 131.27, 128.72, 34.05, 31.13, 22.06, 13.68; HRMS (ESI):  $m/z$  calcd for  $\text{C}_{13}\text{H}_{14}\text{N}_2\text{OS}_2$   $[\text{M}+\text{H}]^+$  279.06203, found 279.06174.

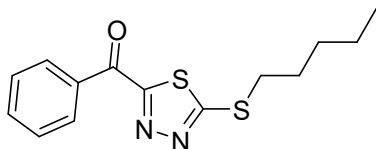

*Date for E5.* A orange-red liquid, yield 91%.  $^1\text{H}$  NMR (400 MHz,  $\text{CDCl}_3$ )  $\delta$ : 8.51 (d,  $J = 8.0$  Hz, 2H, phenyl H), 7.69–7.64 (m, 1H, phenyl H), 7.55–7.51 (m, 2H, phenyl H), 3.42 (t,  $J = 8.0$  Hz, 2H,  $\text{CH}_2\text{CH}_2\text{CH}_2\text{CH}_2\text{CH}_3$ ), 1.90–1.83 (m, 2H,  $\text{CH}_2\text{CH}_2\text{CH}_2\text{CH}_2\text{CH}_3$ ), 1.50–1.42 (m, 2H,  $\text{CH}_2\text{CH}_2\text{CH}_2\text{CH}_2\text{CH}_3$ ), 1.41–1.33 (m, 2H,  $\text{CH}_2\text{CH}_2\text{CH}_2\text{CH}_2\text{CH}_3$ ), 0.92 (t,  $J = 8.0$  Hz, 3H,  $\text{CH}_2\text{CH}_2\text{CH}_2\text{CH}_2\text{CH}_3$ );  $^{13}\text{C}$  NMR (101 MHz,  $\text{CDCl}_3$ )  $\delta$ : 183.01, 173.15, 168.96, 134.61, 134.47, 131.28, 128.74, 34.34, 31.02, 28.84, 22.31, 14.07; HRMS (ESI):  $m/z$  calcd for  $\text{C}_{14}\text{H}_{16}\text{N}_2\text{OS}_2$   $[\text{M}+\text{H}]^+$  293.07768, found 293.07712.

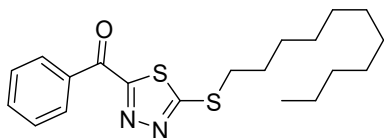

*Date for E6.* A yellow solid, yield 76%, m.p. 37-39 °C.  $^1\text{H}$  NMR (400 MHz,  $\text{CDCl}_3$ )  $\delta$ : 8.52–8.49 (m, 2H, phenyl H), 7.69–7.64 (m, 1H, phenyl H), 7.55–7.51 (m, 2H, phenyl H), 3.41 (t,  $J = 8.0$  Hz, 2H,  $\text{SCH}_2$ ), 3.28–3.25 (m, 2H,  $\text{CH}_2\text{CH}_2(\text{CH}_2)_8\text{CH}_3$ ), 1.89–1.82 (m, 2H,  $(\text{CH}_2)_2\text{CH}_2(\text{CH}_2)_7\text{CH}_3$ ),

1.81–1.74 (m, 2H, (CH<sub>2</sub>)<sub>3</sub>CH<sub>2</sub>(CH<sub>2</sub>)<sub>6</sub>CH<sub>3</sub>), 1.51–1.33 (m, 8H, (CH<sub>2</sub>)<sub>3</sub>CH<sub>2</sub>(CH<sub>2</sub>)<sub>4</sub>CH<sub>2</sub>CH<sub>2</sub>CH<sub>3</sub>), 0.89–0.86 (m, 7H, (CH<sub>2</sub>)<sub>8</sub>CH<sub>2</sub>CH<sub>2</sub>CH<sub>3</sub>); <sup>13</sup>C NMR (101 MHz, CDCl<sub>3</sub>) δ: 182.99, 173.17, 168.94, 165.38, 134.59, 134.46, 131.28, 128.73, 34.41 (d, *J* = 8.1 Hz), 32.03, 29.84, 29.71 (d, *J* = 3.0 Hz), 29.60 (d, *J* = 1.0 Hz), 29.39 (d, *J* = 1.4 Hz), 29.16 (d, *J* = 8.1 Hz), 28.88 (d, *J* = 5.1 Hz), 22.83, 14.27; HRMS (ESI): *m/z* calcd for C<sub>20</sub>H<sub>28</sub>N<sub>2</sub>OS<sub>2</sub> [M+H]<sup>+</sup> 377.17158, found 377.17194.

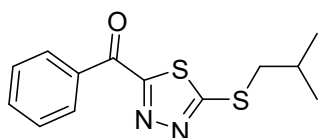

*Date for E7.* A yellow liquid, yield 93%. <sup>1</sup>H NMR (400 MHz, CDCl<sub>3</sub>) δ: 8.52–8.49 (m, 2H, phenyl H), 7.68–7.63 (m, 1H, phenyl H), 7.54–7.50 (m, 2H, phenyl H), 3.33 (d, *J* = 8.0 Hz, 2H, CH<sub>2</sub>), 2.14 (m, 1H, CH), 1.09 (d, *J* = 8.0 Hz, 6H, CH<sub>3</sub>); <sup>13</sup>C NMR (101 MHz, CDCl<sub>3</sub>) δ: 182.95, 173.32, 168.91, 134.60, 134.43, 131.25, 128.70, 42.69, 28.55, 21.95; HRMS (ESI): *m/z* calcd for C<sub>13</sub>H<sub>14</sub>N<sub>2</sub>OS<sub>2</sub> [M+H]<sup>+</sup> 279.06203, found 279.06140.

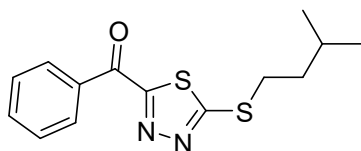

*Date for E8.* A yellow liquid, yield 90%. <sup>1</sup>H NMR (400 MHz, CDCl<sub>3</sub>) δ: 8.51 (d, *J* = 8.0 Hz, 2H, phenyl H), 7.69–7.64 (m, 1H, phenyl H), 7.56–7.51 (m, 2H, phenyl H), 3.43 (t, *J* = 8.0 Hz, 2H, SCH<sub>2</sub>), 1.82–1.70 (m, 3H, CH<sub>2</sub>CH<sub>2</sub>CH(CH<sub>3</sub>)<sub>2</sub>), 0.98 (d, *J* = 4.0 Hz, 6H, CH<sub>2</sub>CH<sub>2</sub>CH(CH<sub>3</sub>)<sub>2</sub>); <sup>13</sup>C NMR (101 MHz, CDCl<sub>3</sub>) δ: 183.01, 173.10, 168.97, 134.61, 134.47, 131.28, 128.74, 37.80, 32.52, 27.71, 22.31; HRMS (ESI): *m/z* calcd for C<sub>14</sub>H<sub>16</sub>N<sub>2</sub>OS<sub>2</sub> [M+H]<sup>+</sup> 293.07768, found 293.07727.

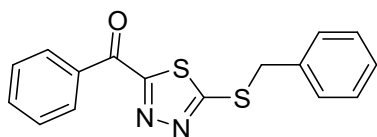

*Date for E9.* A yellowish orange solid, yield 88%, m.p. 56–58 °C. <sup>1</sup>H NMR (400 MHz, DMSO-*d*<sub>6</sub>)



$\delta$ : 8.34–8.31 (m, 2H, phenyl H), 7.79–7.75 (m, 1H, phenyl H), 7.65–7.61 (m, 2H, phenyl H), 7.55–7.53 (m, 2H, phenyl H), 7.40–7.36 (m, 2H, phenyl H), 7.34–7.30 (m, 1H, phenyl H), 4.71 (s, 2H, CH<sub>2</sub>); <sup>13</sup>C NMR (101 MHz, DMSO-*d*<sub>6</sub>)  $\delta$ : 182.71, 171.95, 168.74, 135.84, 134.45, 134.26, 130.66, 129.22, 128.73, 128.69, 127.89, 37.52; HRMS (ESI): *m/z* calcd for C<sub>16</sub>H<sub>12</sub>N<sub>2</sub>OS<sub>2</sub> [M+H]<sup>+</sup> 313.04638, found 313.04599.

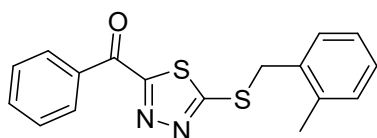

*Date for E10.* A yellowish orange solid, yield 90%, m.p. 45-47 °C. <sup>1</sup>H NMR (400 MHz, DMSO-*d*<sub>6</sub>)  $\delta$ : 8.34 (d, *J* = 8.0 Hz, 2H, phenyl H), 7.80–7.76 (m, 1H, phenyl H), 7.65–7.62 (m, 2H, phenyl H), 7.48 (d, *J* = 8.0 Hz, 1H, phenyl H), 7.26–7.24 (m, 2H, phenyl H), 7.23–7.18 (m, 1H, phenyl H), 4.73 (s, 2H, CH<sub>2</sub>), 2.42 (s, 3H, CH<sub>3</sub>); <sup>13</sup>C NMR (101 MHz, DMSO-*d*<sub>6</sub>)  $\delta$ : 182.75, 171.74, 168.81, 137.06, 134.50, 134.28, 133.18, 130.69, 130.59, 130.20, 128.77, 128.35, 126.26, 36.13, 18.86; HRMS (ESI): *m/z* calcd for C<sub>17</sub>H<sub>14</sub>N<sub>2</sub>OS<sub>2</sub> [M+H]<sup>+</sup> 327.06203, found 327.06158.

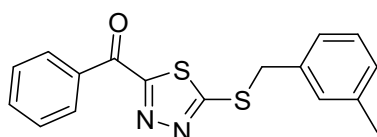

*Date for E11.* A greenish-yellow solid, yield 89%, m.p. 58-59 °C. <sup>1</sup>H NMR (400 MHz, CDCl<sub>3</sub>)  $\delta$ : 8.52–8.49 (m, 2H, phenyl H), 7.70–7.65 (m, 1H, phenyl H), 7.56–7.52 (m, 2H, phenyl H), 7.27–7.22 (m, 3H, phenyl H), 7.13 (d, *J* = 8.0 Hz, 1H, phenyl H), 4.63 (s, 2H, CH<sub>2</sub>), 2.36 (s, 3H, CH<sub>3</sub>); <sup>13</sup>C NMR (101 MHz, CDCl<sub>3</sub>)  $\delta$ : 183.03, 172.14, 169.26, 138.82, 135.12, 134.59, 134.52, 131.28, 130.03, 129.12, 128.91, 128.77, 126.43, 38.28, 21.51; HRMS (ESI): *m/z* calcd for C<sub>17</sub>H<sub>14</sub>N<sub>2</sub>OS<sub>2</sub> [M+H]<sup>+</sup> 327.06203, found 327.06155.

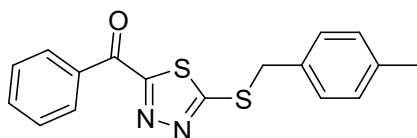

*Date for E12.* A yellow solid, yield 86%, m.p. 71-72 °C.  $^1\text{H}$  NMR (400 MHz,  $\text{DMSO-}d_6$ )  $\delta$ : 8.34–8.31 (m, 2H, phenyl H), 7.79–7.75 (m, 1H, phenyl H), 7.64–7.61 (m, 2H, phenyl H), 7.41 (d,  $J$  = 8.0 Hz, 2H, phenyl H), 7.18 (d,  $J$  = 8.0 Hz, 2H, phenyl H), 4.66 (s, 2H,  $\text{CH}_2$ ), 2.29 (s, 3H,  $\text{CH}_3$ );  $^{13}\text{C}$  NMR (101 MHz,  $\text{DMSO-}d_6$ )  $\delta$ : 182.70, 172.08, 168.67, 137.23, 134.46, 134.27, 132.64, 130.67, 129.25, 129.16, 128.74, 37.40, 20.74; HRMS (ESI):  $m/z$  calcd for  $\text{C}_{17}\text{H}_{14}\text{N}_2\text{OS}_2$   $[\text{M}+\text{H}]^+$  327.06203, found 327.06161.

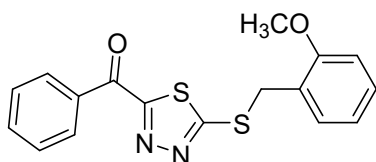

*Date for E13.* A white solid, yield 87%, m.p. 85-86 °C.  $^1\text{H}$  NMR (400 MHz,  $\text{CDCl}_3$ )  $\delta$ : 8.50 (d,  $J$  = 8.0 Hz, 2H, phenyl H), 7.68–7.64 (m, 1H, phenyl H), 7.55–7.47 (m, 3H, phenyl H), 7.32–7.24 (m, 1H, phenyl H), 6.94–6.90 (m, 2H, phenyl H), 4.69 (s, 2H,  $\text{CH}_2$ ), 3.89 (s, 3H,  $\text{CH}_3$ );  $^{13}\text{C}$  NMR (101 MHz,  $\text{CDCl}_3$ )  $\delta$ : 183.07, 173.10, 169.05, 157.71, 134.64, 134.44, 131.25, 131.05, 129.83, 128.73, 123.79, 120.71, 110.75, 55.66, 33.36; HRMS (ESI):  $m/z$  calcd for  $\text{C}_{17}\text{H}_{14}\text{N}_2\text{O}_2\text{S}_2$   $[\text{M}+\text{H}]^+$  343.05695, found 343.05679.

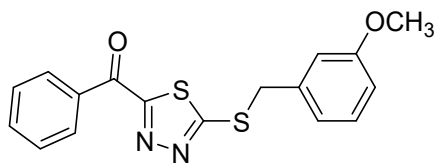

*Date for E14.* A white solid, yield 90%, m.p. 71-72 °C.  $^1\text{H}$  NMR (400 MHz,  $\text{CDCl}_3$ )  $\delta$ : 8.51–8.48 (m, 2H, phenyl H), 7.69–7.65 (m, 1H, phenyl H), 7.56–7.52 (m, 2H, phenyl H), 7.27 (t,  $J$  = 8.0 Hz, 1H, phenyl H), 7.06 (d,  $J$  = 8.0 Hz, 1H, phenyl H), 7.00 (s, 1H, phenyl H), 6.87–6.84 (m, 1H, phenyl H), 4.63 (s, 2H,  $\text{CH}_2$ ), 3.81 (s, 3H,  $\text{CH}_3$ );  $^{13}\text{C}$  NMR (101 MHz,  $\text{CDCl}_3$ )  $\delta$ : 182.99, 171.96,

169.30, 159.99, 136.72, 134.54, 134.52, 131.26, 130.04, 128.76, 121.65, 114.83, 113.83, 55.42, 38.22; HRMS (ESI):  $m/z$  calcd for  $C_{17}H_{14}N_2O_2S_2$   $[M+H]^+$  343.05695, found 343.05612.

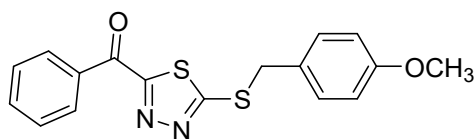

*Date for E15.* A white solid, yield 91%, m.p. 89-90 °C.  $^1H$  NMR (400 MHz,  $CDCl_3$ )  $\delta$ : 8.51–8.48 (m, 2H, phenyl H), 7.69–7.65 (m, 1H, phenyl H), 7.56–7.52 (m, 2H, phenyl H), 7.41–7.37 (m, 2H, phenyl H), 6.89–6.86 (m, 2H, phenyl H), 4.61 (s, 2H,  $CH_2$ ), 3.80 (s, 3H,  $CH_3$ );  $^{13}C$  NMR (101 MHz,  $CDCl_3$ )  $\delta$ : 183.01, 172.15, 169.19, 159.56, 134.57, 134.50, 131.26, 130.65, 128.75, 127.12, 114.35, 55.43, 37.91; HRMS (ESI):  $m/z$  calcd for  $C_{17}H_{14}N_2O_2S_2$   $[M+H]^+$  343.05695, found 343.05606.

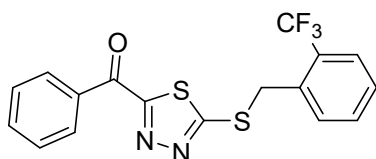

*Date for E16.* A yellow solid, yield 90%, m.p. 64-66 °C.  $^1H$  NMR (400 MHz,  $DMSO-d_6$ )  $\delta$ : 8.36–8.33 (m, 2H, phenyl H), 7.86 (d,  $J = 8.0$  Hz, 1H, phenyl H), 7.82–7.76 (m, 2H, phenyl H), 7.72 (t,  $J = 8.0$  Hz, 1H, phenyl H), 7.65–7.61 (m, 2H, phenyl H), 7.58 (t,  $J = 8.0$  Hz, 1H, phenyl H), 4.90 (s, 2H,  $CH_2$ );  $^{13}C$  NMR (101 MHz,  $DMSO-d_6$ )  $\delta$ : 182.76, 170.74, 169.24, 134.53, 134.23, 133.76 (d,  $J = 1.0$  Hz), 133.18, 132.05, 130.70, 128.83, 128.76, 127.38 (q,  $J = 30.3$  Hz), 126.48 (q,  $J = 5.1$  Hz), 124.28 (q,  $J = 275.7$  Hz), 34.20 (d,  $J = 2.0$  Hz);  $^{19}F$  NMR (376 MHz,  $DMSO-d_6$ )  $\delta$ : -58.09; HRMS (ESI):  $m/z$  calcd for  $C_{17}H_{11}F_3N_2OS_2$   $[M+H]^+$  381.03377, found 381.03305.

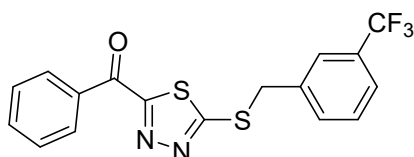

*Date for E17.* A yellow solid, yield 90%, m.p. 74-76 °C.  $^1H$  NMR (400 MHz,  $CDCl_3$ )  $\delta$ : 8.51–

8.48 (m, 2H, phenyl H), 7.73 (s, 1H, phenyl H), 7.71–7.65 (m, 2H, phenyl H), 7.58–7.52 (m, 3H, phenyl H), 7.48 (t,  $J = 8.0$  Hz, 1H, phenyl H), 4.72 (s, 2H, CH<sub>2</sub>); <sup>13</sup>C NMR (101 MHz, CDCl<sub>3</sub>)  $\delta$ : 182.95, 170.92, 169.69, 136.79, 134.61, 134.49, 132.81 (d,  $J = 1.0$  Hz), 131.53, 131.26, 129.47, 128.81, 126.08 (q,  $J = 4.0$  Hz), 125.10 (q,  $J = 4.0$  Hz), 123.96 (q,  $J = 269.7$  Hz), 37.25; <sup>19</sup>F NMR (376 MHz, CDCl<sub>3</sub>)  $\delta$  -62.65; HRMS (ESI):  $m/z$  calcd for C<sub>17</sub>H<sub>11</sub>F<sub>3</sub>N<sub>2</sub>OS<sub>2</sub> [M+H]<sup>+</sup> 381.03377, found 381.03302.

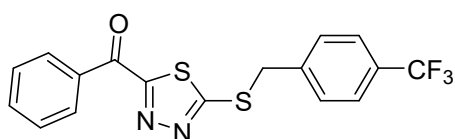

*Date for E18.* A yellowish orange solid, yield 89%, m.p. 117-118 °C. <sup>1</sup>H NMR (400 MHz, DMSO-*d*<sub>6</sub>)  $\delta$ : 8.32 (d,  $J = 8.0$  Hz, 2H, phenyl H), 7.79–7.73 (m, 5H, phenyl H), 7.64–7.60 (m, 2H, phenyl H), 4.81 (s, 2H, CH<sub>2</sub>); <sup>13</sup>C NMR (101 MHz, DMSO-*d*<sub>6</sub>)  $\delta$ : 182.68, 171.35, 169.03, 141.29 (d,  $J = 1.0$  Hz), 134.46, 134.22, 130.65, 130.00, 128.72, 128.25 (q,  $J = 31.9$  Hz), 125.49 (q,  $J = 4.0$  Hz), 124.16 (q,  $J = 272.7$  Hz), 36.57; <sup>19</sup>F NMR (471 MHz, CDCl<sub>3</sub>)  $\delta$ : -62.50; HRMS (ESI):  $m/z$  calcd for C<sub>17</sub>H<sub>11</sub>F<sub>3</sub>N<sub>2</sub>OS<sub>2</sub> [M+H]<sup>+</sup> 381.03377, found 381.03311.

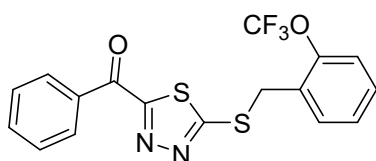

*Date for E19.* A yellow solid, yield 92%, m.p. 66-67 °C. <sup>1</sup>H NMR (400 MHz, CDCl<sub>3</sub>)  $\delta$ : 8.50 (d,  $J = 8.0$  Hz, 2H, phenyl H), 7.70–7.65 (m, 2H, phenyl H), 7.57–7.53 (m, 2H, phenyl H), 7.38–7.34 (m, 1H, phenyl H), 7.31–7.24 (m, 2H, phenyl H), 4.74 (s, 2H, CH<sub>2</sub>); <sup>13</sup>C NMR (101 MHz, CDCl<sub>3</sub>)  $\delta$ : 182.99, 171.49, 169.59, 147.86 (q,  $J = 1.4$  Hz), 134.57, 134.55, 131.86, 131.26, 129.91, 128.79, 128.22, 127.06, 120.67 (q,  $J = 259.6$  Hz), 120.39 (q,  $J = 1.6$  Hz), 32.08; <sup>19</sup>F NMR (376 MHz, CDCl<sub>3</sub>)  $\delta$ : -56.88; HRMS (ESI):  $m/z$  calcd for C<sub>17</sub>H<sub>11</sub>F<sub>3</sub>N<sub>2</sub>O<sub>2</sub>S<sub>2</sub> [M+H]<sup>+</sup> 397.02868, found

397.02795.

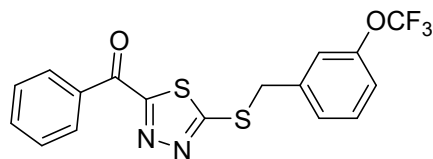

*Date for E20.* A yellow solid, yield 93%, m.p. 64-66 °C.  $^1\text{H}$  NMR (400 MHz,  $\text{CDCl}_3$ )  $\delta$ : 8.51–8.48 (m, 2H, phenyl H), 7.70–7.66 (m, 1H, phenyl H), 7.57–7.52 (m, 2H, phenyl H), 7.44–7.41 (m, 1H, phenyl H), 7.38 (t,  $J = 8.0$  Hz, 1H, phenyl H), 7.34 (s, 1H, phenyl H), 7.18–7.15 (m, 1H, phenyl H), 4.67 (s, 2H,  $\text{CH}_2$ );  $^{13}\text{C}$  NMR (101 MHz,  $\text{CDCl}_3$ )  $\delta$ : 182.95, 171.02, 169.63, 149.53 (q,  $J = 2.0$  Hz), 137.97, 134.60, 134.48, 131.26, 130.34, 128.80, 127.78, 121.90, 120.68, 120.52 (q,  $J = 258.6$  Hz), 37.19;  $^{19}\text{F}$  NMR (376 MHz,  $\text{CDCl}_3$ )  $\delta$ : -57.75; HRMS (ESI):  $m/z$  calcd for  $\text{C}_{17}\text{H}_{11}\text{F}_3\text{N}_2\text{O}_2\text{S}_2$   $[\text{M}+\text{H}]^+$  397.02868, found 397.02808.

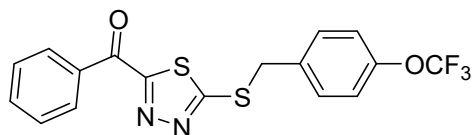

*Date for E21.* A yellow solid, yield 87%, m.p. 90-91 °C.  $^1\text{H}$  NMR (400 MHz,  $\text{CDCl}_3$ )  $\delta$ : 8.51–8.48 (m, 2H, phenyl H), 7.70–7.66 (m, 1H, phenyl H), 7.57–7.50 (m, 4H, phenyl H), 7.19 (d,  $J = 8.0$  Hz, 2H, phenyl H), 4.66 (s, 2H,  $\text{CH}_2$ );  $^{13}\text{C}$  NMR (101 MHz,  $\text{CDCl}_3$ )  $\delta$ : 182.96, 171.23, 169.60, 149.03 (q,  $J = 2.0$  Hz), 134.60, 134.6 (d,  $J = 3.9$  Hz), 131.26, 130.89, 128.80, 121.41, 120.52 (q,  $J = 258.4$  Hz), 119.26 (q,  $J = 2.5$  Hz), 37.00;  $^{19}\text{F}$  NMR (376 MHz,  $\text{CDCl}_3$ )  $\delta$ : -57.83; HRMS (ESI):  $m/z$  calcd for  $\text{C}_{17}\text{H}_{11}\text{F}_3\text{N}_2\text{O}_2\text{S}_2$   $[\text{M}+\text{H}]^+$  397.02868, found 397.02817.

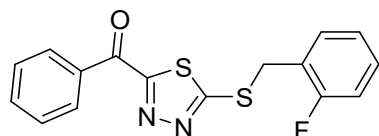

*Date for E22.* A yellowish orange solid, yield 91%, m.p. 59-60 °C.  $^1\text{H}$  NMR (400 MHz,  $\text{DMSO}-d_6$ )  $\delta$ : 8.34–8.31 (m, 2H, phenyl H), 7.80–7.75 (m, 1H, phenyl H), 7.65–7.61 (m, 3H, phenyl H),

7.42–7.37 (m, 1H, phenyl H), 7.29–7.24 (m, 1H, phenyl H), 7.23–7.20 (m, 1H, phenyl H), 4.75 (s, 2H, CH<sub>2</sub>); <sup>13</sup>C NMR (101 MHz, DMSO-*d*<sub>6</sub>) δ: 182.74, 171.20, 169.08, 160.57 (d, *J* = 247.5 Hz), 134.51, 134.25, 131.62 (d, *J* = 3.0 Hz), 130.70, 130.36 (d, *J* = 8.1 Hz), 128.76, 124.72 (d, *J* = 3.0 Hz), 122.94 (d, *J* = 14.1 Hz), 115.64 (d, *J* = 20.2 Hz), 31.16 (d, *J* = 3.0 Hz); <sup>19</sup>F NMR (471 MHz, CDCl<sub>3</sub>) δ: -116.31; HRMS (ESI): *m/z* calcd for C<sub>16</sub>H<sub>11</sub>FN<sub>2</sub>OS<sub>2</sub> [M+H]<sup>+</sup> 331.03696, found 331.03632.

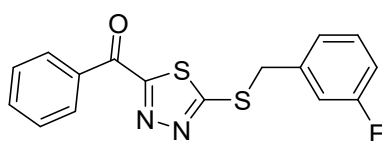

*Date for E23.* A greenish-yellow solid, yield 89%, m.p. 66-67 °C. <sup>1</sup>H NMR (400 MHz, CDCl<sub>3</sub>) δ: 8.51–8.48 (m, 2H, phenyl H), 7.69–7.65 (m, 1H, phenyl H), 7.56–7.52 (m, 2H, phenyl H), 7.34–7.29 (m, 1H, phenyl H), 7.24 (s, 1H, phenyl H), 7.22–7.18 (m, 1H, phenyl H), 7.03–6.97 (m, 1H, phenyl H), 4.64 (s, 2H, CH<sub>2</sub>); <sup>13</sup>C NMR (101 MHz, CDCl<sub>3</sub>) δ: 182.93, 171.28, 169.53, 162.93 (d, *J* = 248.5 Hz), 137.99 (d, *J* = 7.1 Hz), 134.56, 134.47, 131.24, 130.48 (d, *J* = 8.1 Hz), 128.77, 125.04 (d, *J* = 3.0 Hz), 116.30 (d, *J* = 22.2 Hz), 115.25 (d, *J* = 21.2 Hz), 37.34 (d, *J* = 2.0 Hz); <sup>19</sup>F NMR (376 MHz, CDCl<sub>3</sub>) δ: -112.17; HRMS (ESI): *m/z* calcd for C<sub>16</sub>H<sub>11</sub>FN<sub>2</sub>OS<sub>2</sub> [M+H]<sup>+</sup> 331.03696, found 331.03647.

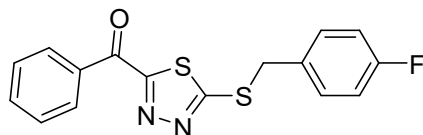

*Date for E24.* A yellow solid, yield 90%, m.p. 96-97 °C. <sup>1</sup>H NMR (400 MHz, DMSO-*d*<sub>6</sub>) δ: 8.33–8.30 (m, 2H, phenyl H), 7.79–7.74 (m, 1H, phenyl H), 7.64–7.55 (m, 4H, phenyl H), 7.23–7.17 (m, 2H, phenyl H), 4.70 (s, 2H, CH<sub>2</sub>); <sup>13</sup>C NMR (101 MHz, DMSO-*d*<sub>6</sub>) δ: 182.70, 171.71, 168.82, 161.67 (d, *J* = 245.4 Hz), 134.46, 134.25, 132.26 (d, *J* = 3.0 Hz), 131.33 (d, *J* = 8.1 Hz), 130.66,

128.73, 115.49 (d,  $J = 22.2$  Hz), 36.61;  $^{19}\text{F}$  NMR (376 MHz,  $\text{CDCl}_3$ )  $\delta$ : -114.24; HRMS (ESI):

$m/z$  calcd for  $\text{C}_{16}\text{H}_{11}\text{FN}_2\text{OS}_2$   $[\text{M}+\text{H}]^+$  331.03696, found 331.03644.

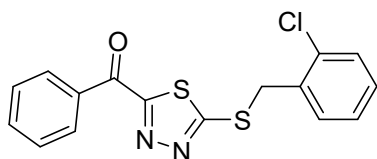

*Date for E25.* A yellowish orange solid, yield 87%, m.p. 103-104 °C.  $^1\text{H}$  NMR (400 MHz,  $\text{DMSO}-d_6$ )  $\delta$ : 8.34–8.31 (m, 2H, phenyl H), 7.79–7.75 (m, 1H, phenyl H), 7.71–7.68 (m, 1H, phenyl H), 7.62 (t,  $J = 8.0$  Hz, 2H, phenyl H), 7.54–7.51 (m, 1H, phenyl H), 7.40–7.34 (m, 2H, phenyl H), 4.80 (s, 2H,  $\text{CH}_2$ );  $^{13}\text{C}$  NMR (101 MHz,  $\text{DMSO}-d_6$ )  $\delta$ : 182.73, 171.07, 169.09, 134.48, 134.23, 133.50, 133.28, 131.72, 130.67, 130.05, 129.71, 128.74, 127.56, 35.52; HRMS (ESI):  $m/z$  calcd for  $\text{C}_{16}\text{H}_{11}\text{ClN}_2\text{OS}_2$   $[\text{M}+\text{H}]^+$  347.00741, found 347.00681.

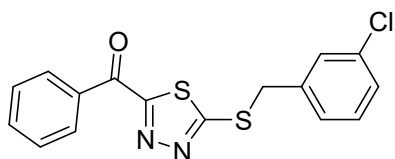

*Date for E26.* A greenish-yellow solid, yield 85%, m.p. 77-78 °C.  $^1\text{H}$  NMR (400 MHz,  $\text{CDCl}_3$ )  $\delta$ : 8.51–8.48 (m, 2H, phenyl H), 7.70–7.65 (m, 1H, phenyl H), 7.56–7.52 (m, 2H, phenyl H), 7.48 (s, 1H, phenyl H), 7.39–7.34 (m, 1H, phenyl H), 7.31–7.28 (m, 2H, phenyl H), 4.63 (s, 2H,  $\text{CH}_2$ );  $^{13}\text{C}$  NMR (101 MHz,  $\text{CDCl}_3$ )  $\delta$ : 182.97, 171.21, 169.58, 137.61, 134.76, 134.58, 134.51, 131.27, 130.21, 129.39, 128.79, 128.49, 127.57, 37.27; HRMS (ESI):  $m/z$  calcd for  $\text{C}_{16}\text{H}_{11}\text{ClN}_2\text{OS}_2$   $[\text{M}+\text{H}]^+$  347.00741, found 347.00677.

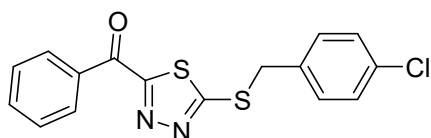

*Date for E27.* A yellowish orange solid, yield 90%, m.p. 106-108 °C.  $^1\text{H}$  NMR (400 MHz,  $\text{DMSO}-d_6$ )  $\delta$ : 8.32 (d,  $J = 8.0$  Hz, 2H, phenyl H), 7.79–7.75 (m, 1H, phenyl H), 7.64–7.61 (m, 2H,

phenyl H), 7.57 (d,  $J = 8.0$  Hz, 2H, phenyl H), 7.44 (d,  $J = 8.0$  Hz, 2H, phenyl H), 4.71 (s, 2H, CH<sub>2</sub>); <sup>13</sup>C NMR (101 MHz, DMSO-*d*<sub>6</sub>)  $\delta$ : 182.69, 171.58, 168.89, 135.23, 134.46, 134.24, 132.45, 131.09, 130.66, 128.72, 128.62, 36.57; HRMS (ESI):  $m/z$  calcd for C<sub>16</sub>H<sub>11</sub>ClN<sub>2</sub>OS<sub>2</sub> [M+H]<sup>+</sup> 347.00741, found 347.00681.

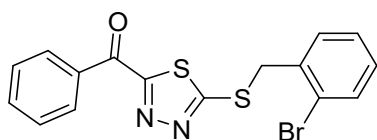

*Date for E28.* A yellowish solid, yield 88%, m.p. 105-106 °C. <sup>1</sup>H NMR (400 MHz, DMSO-*d*<sub>6</sub>)  $\delta$ : 8.35–8.32 (m, 2H, phenyl H), 7.80–7.76 (m, 1H, phenyl H), 7.72–7.69 (m, 2H, phenyl H), 7.65–7.61 (m, 2H, phenyl H), 7.43–7.39 (m, 1H, phenyl H), 7.32–7.28 (m, 1H, phenyl H), 4.80 (s, 2H, CH<sub>2</sub>); <sup>13</sup>C NMR (101 MHz, DMSO-*d*<sub>6</sub>)  $\delta$ : 182.75, 171.05, 169.12, 134.92, 134.51, 134.25, 133.02, 131.79, 130.70, 130.27, 128.76, 128.16, 124.25, 38.16; HRMS (ESI):  $m/z$  calcd for C<sub>16</sub>H<sub>11</sub>BrN<sub>2</sub>OS<sub>2</sub> [M+H]<sup>+</sup> 390.95689, found 390.95636.

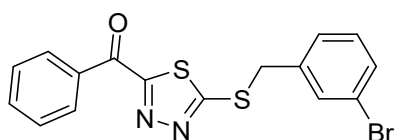

*Date for E29.* A yellow solid, yield 84%, m.p. 97-98 °C. <sup>1</sup>H NMR (400 MHz, CDCl<sub>3</sub>)  $\delta$ : 8.51–8.48 (m, 2H, phenyl H), 7.70–7.65 (m, 1H, phenyl H), 7.63 (s, 1H, phenyl H), 7.56–7.52 (m, 2H, phenyl H), 7.45–7.41 (m, 2H, phenyl H), 7.22 (t,  $J = 8.0$  Hz, 1H, phenyl H), 4.62 (s, 2H, CH<sub>2</sub>); <sup>13</sup>C NMR (101 MHz, CDCl<sub>3</sub>)  $\delta$ : 182.95, 171.17, 169.58, 137.88, 134.57, 134.50, 132.27, 131.40, 131.26, 130.47, 128.79, 128.04, 122.89, 37.19; HRMS (ESI):  $m/z$  calcd for C<sub>16</sub>H<sub>11</sub>BrN<sub>2</sub>OS<sub>2</sub> [M+H]<sup>+</sup> 390.95689, found 390.95630.

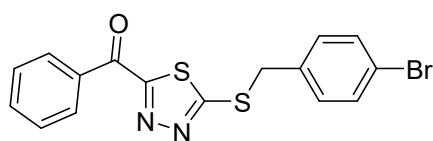



Date for **E30**. A yellowish orange solid, yield 89%, m.p. 103-104 °C.  $^1\text{H}$  NMR (400 MHz,  $\text{DMSO-}d_6$ )  $\delta$ : 8.33–8.31 (m, 2H, phenyl H), 7.79–7.75 (m, 1H, phenyl H), 7.65–7.61 (m, 2H, phenyl H), 7.59–7.56 (m, 2H, phenyl H), 7.52–7.48 (m, 2H, phenyl H), 4.69 (s, 2H,  $\text{CH}_2$ );  $^{13}\text{C}$  NMR (101 MHz,  $\text{DMSO-}d_6$ )  $\delta$ : 183.16, 172.04, 169.37, 136.14, 134.93, 134.71, 132.01, 131.89, 131.13, 129.20, 121.48, 37.09; HRMS (ESI):  $m/z$  calcd for  $\text{C}_{16}\text{H}_{11}\text{BrN}_2\text{OS}_2$   $[\text{M}+\text{H}]^+$  390.95689, found 390.95618.

## 2. Copies of $^1\text{H}$ NMR, $^{13}\text{C}$ NMR, $^{19}\text{F}$ NMR and HRMS of the title compounds

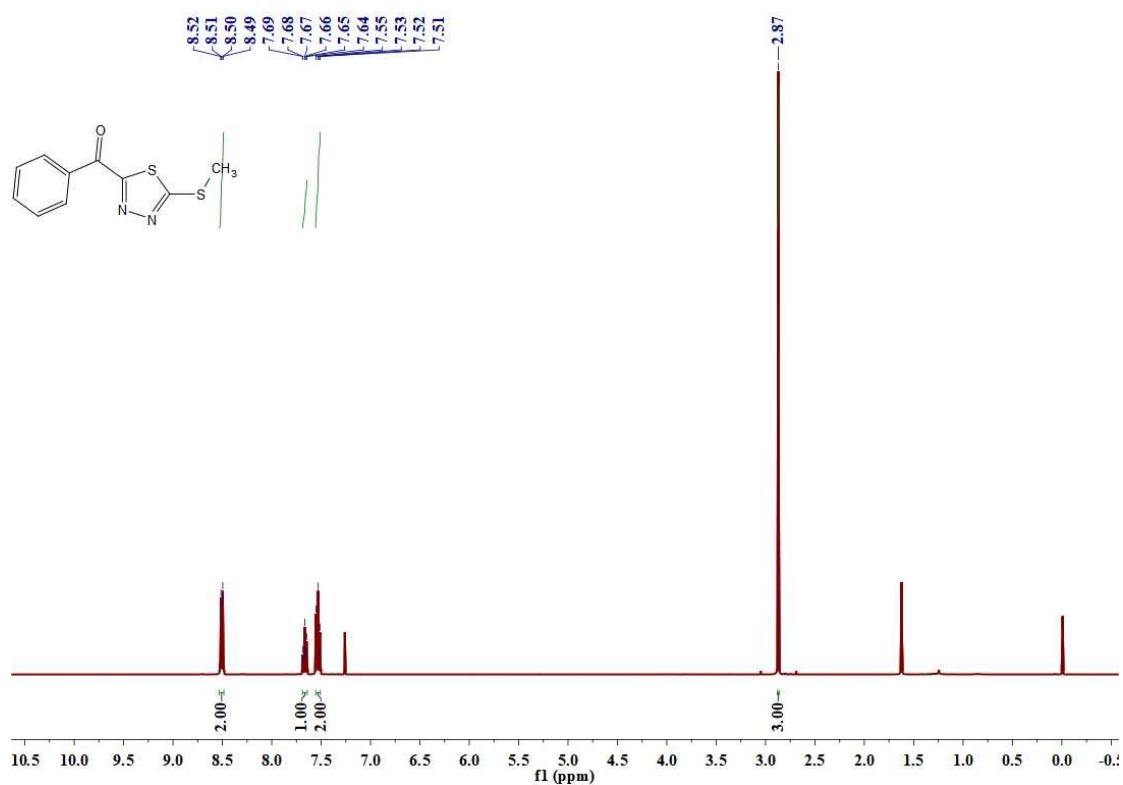

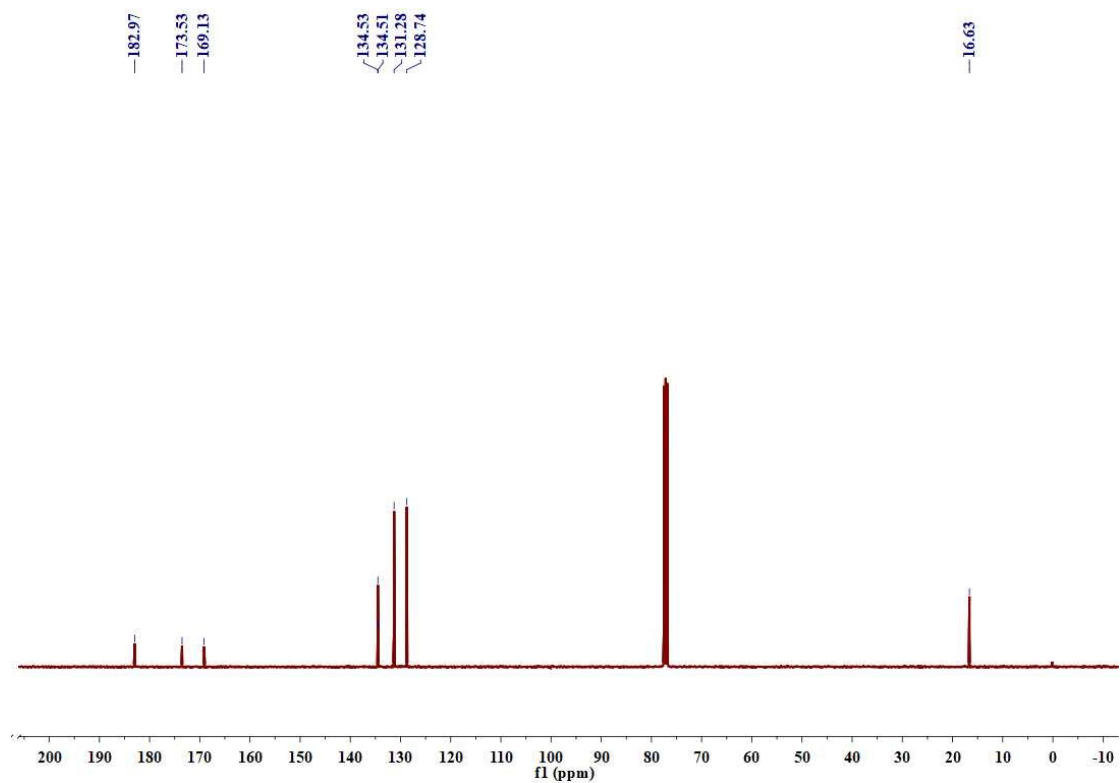

23 #39 RT: 0.39 AV: 1 NL: 5.01E+008  
 T: FTMS + p ESI Full ms [120.0000-1800.0000]

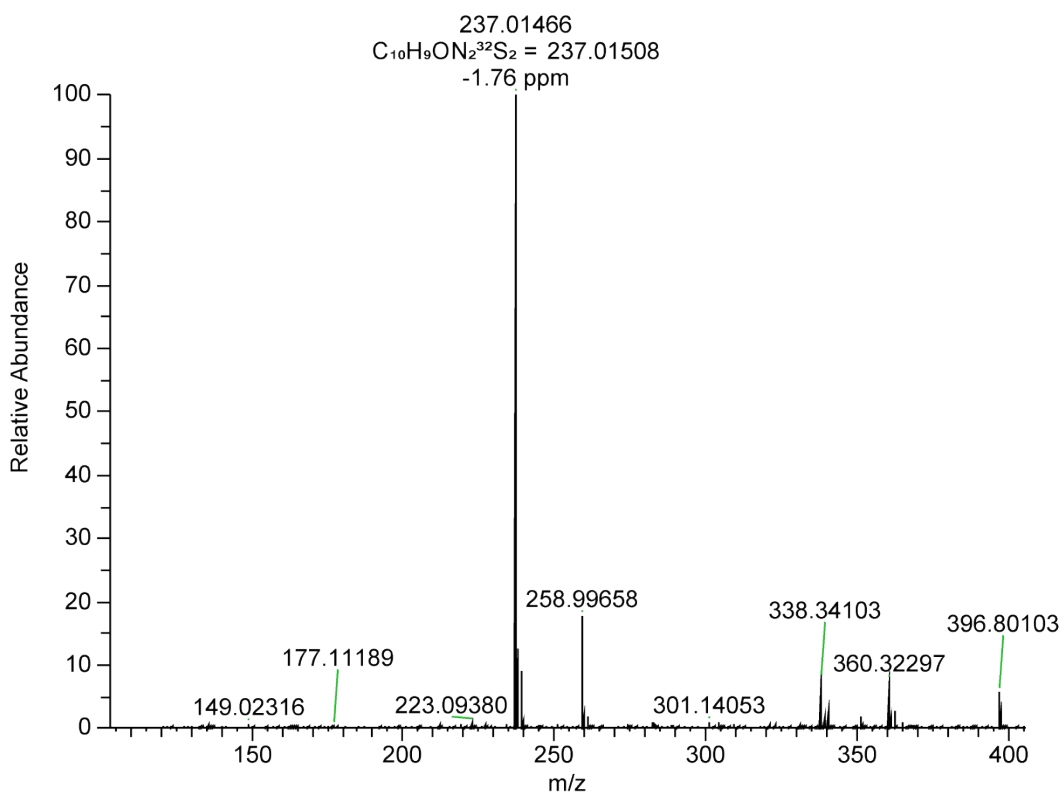

Figure S1.  $^1H$  NMR,  $^{13}C$  NMR and HRMS for E1.

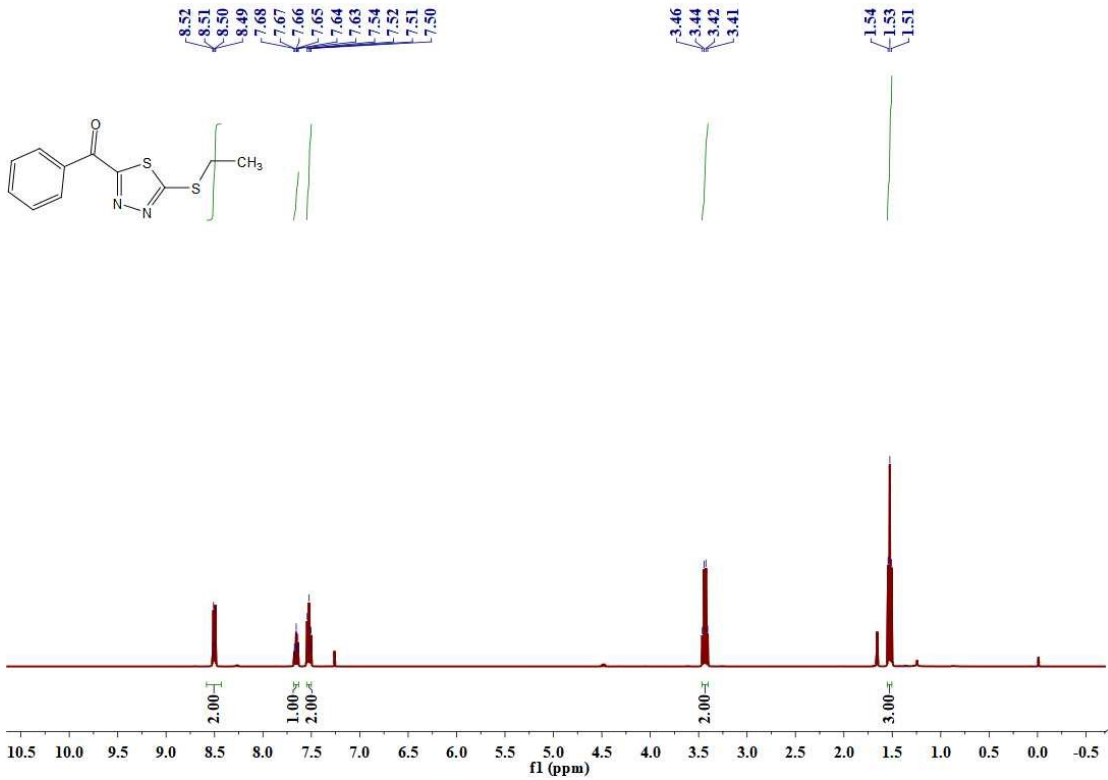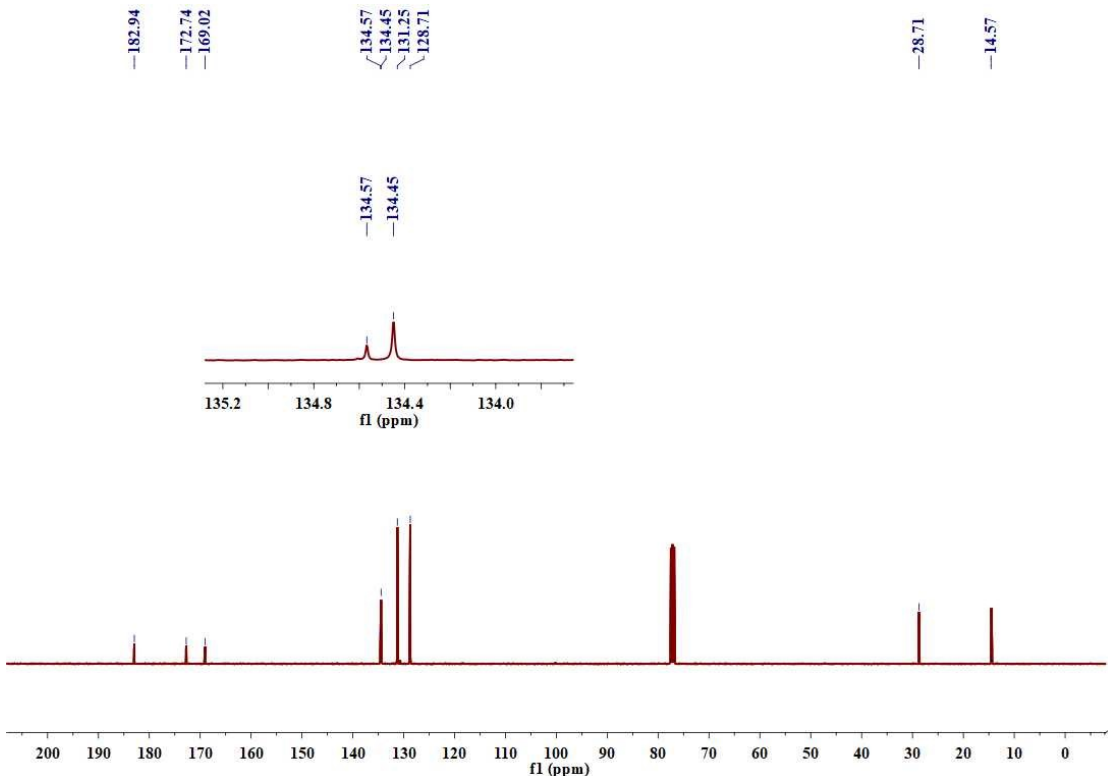

24 #49 RT: 0.48 AV: 1 NL: 1.05E+009  
T: FTMS + p ESI Full ms [120.0000-1800.0000]

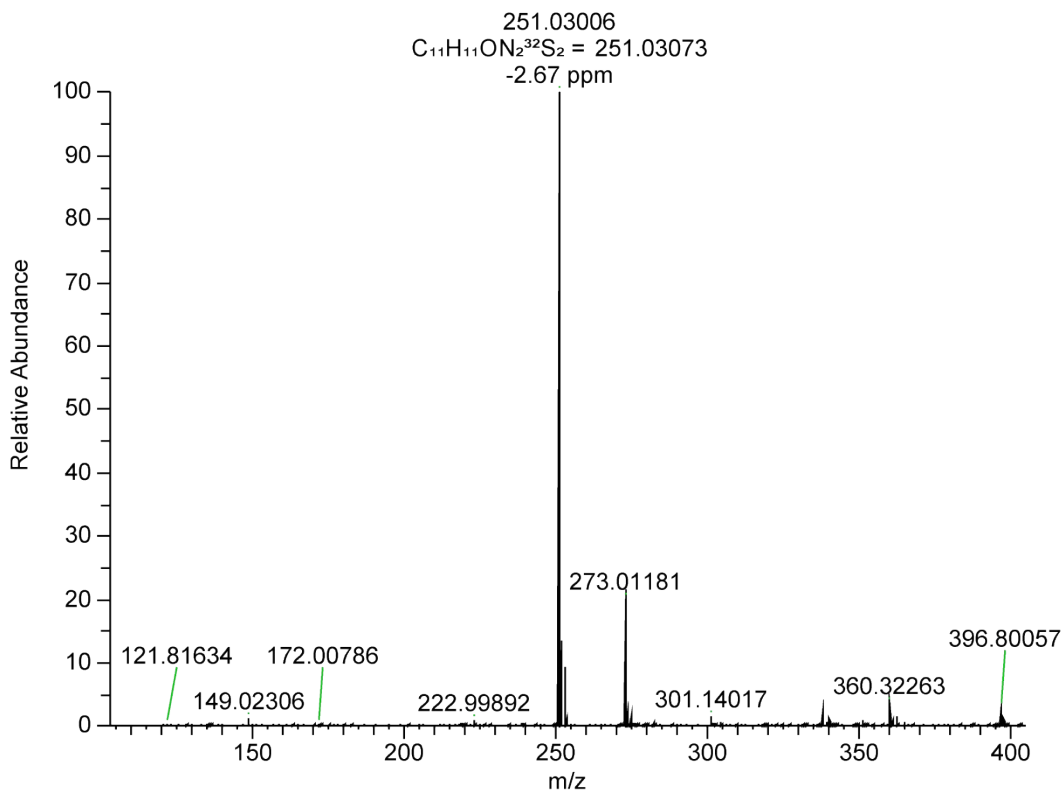

Figure S2.  $^1H$  NMR,  $^{13}C$  NMR and HRMS for E2.

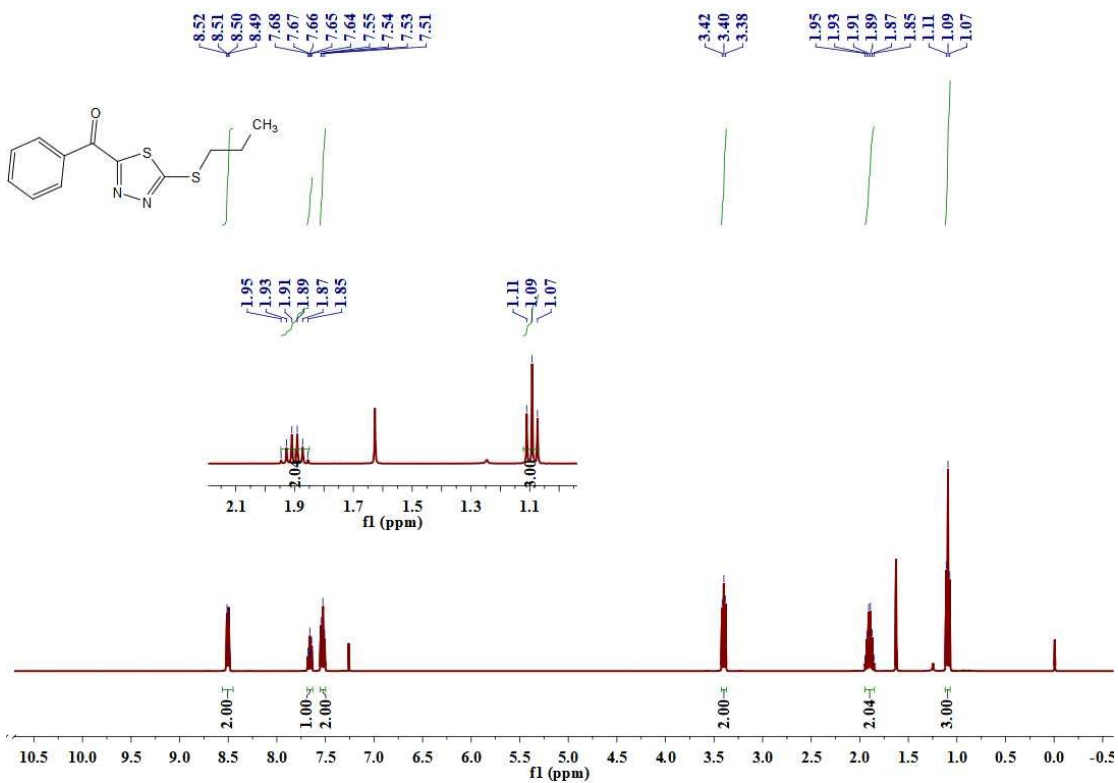

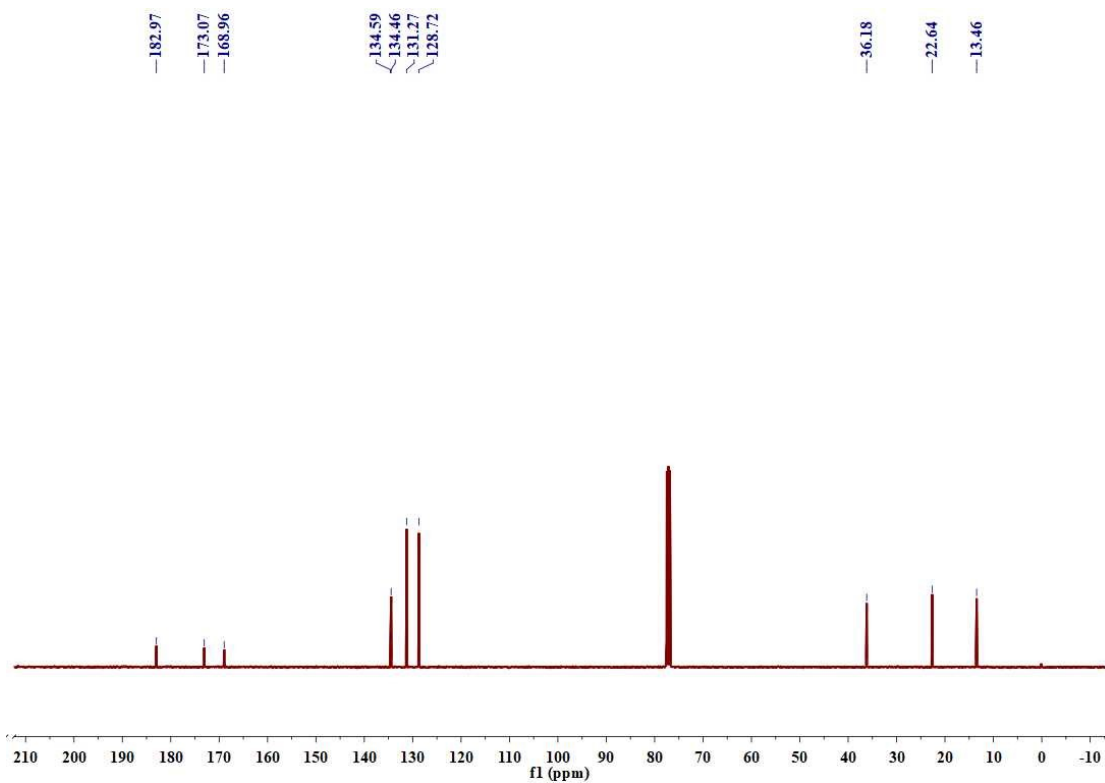

25 #57 RT: 0.56 AV: 1 NL: 1.24E+009  
 T: FTMS + p ESI Full ms [120.0000-1800.0000]

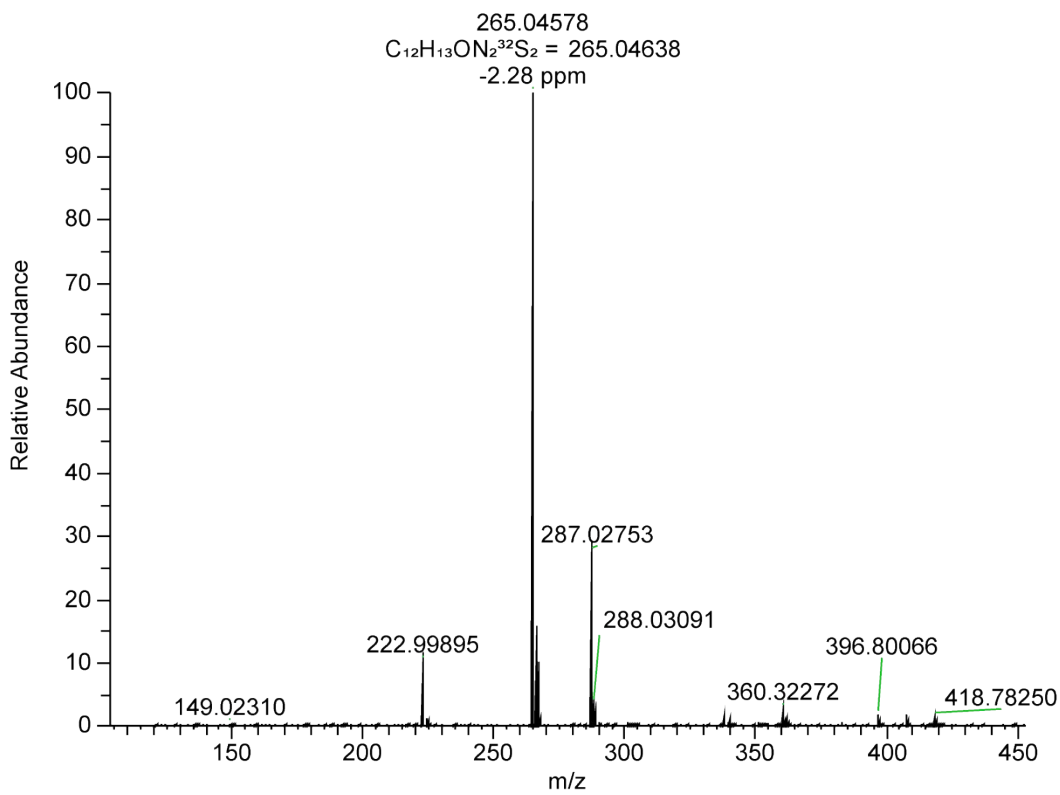

Figure S3.  $^1H$  NMR,  $^{13}C$  NMR and HRMS for E3.

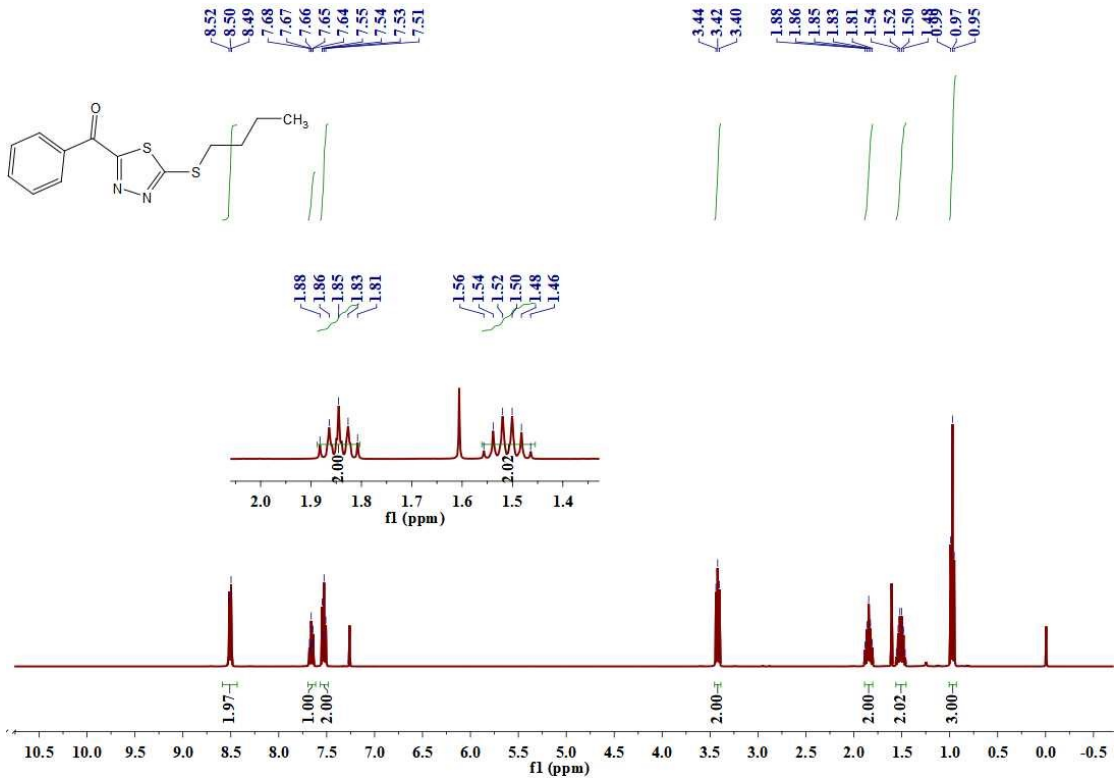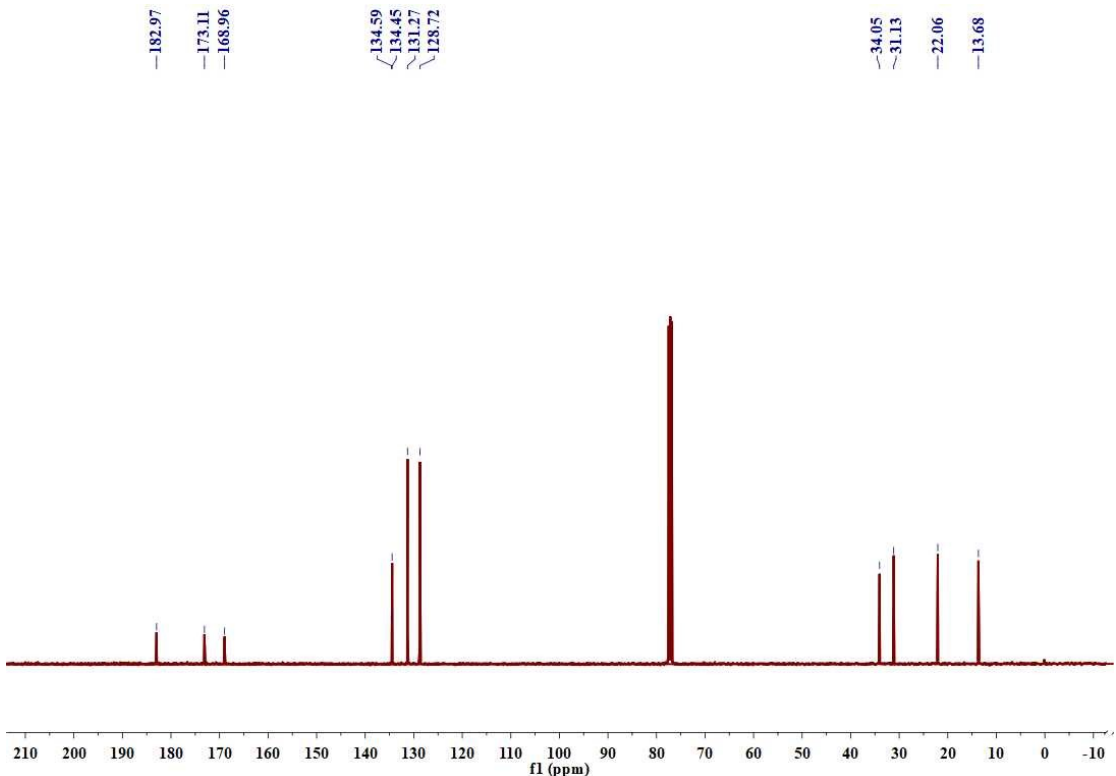

33 #81 RT: 0.80 AV: 1 NL: 1.04E+008  
T: FTMS + p ESI Full ms [120.0000-1800.0000]

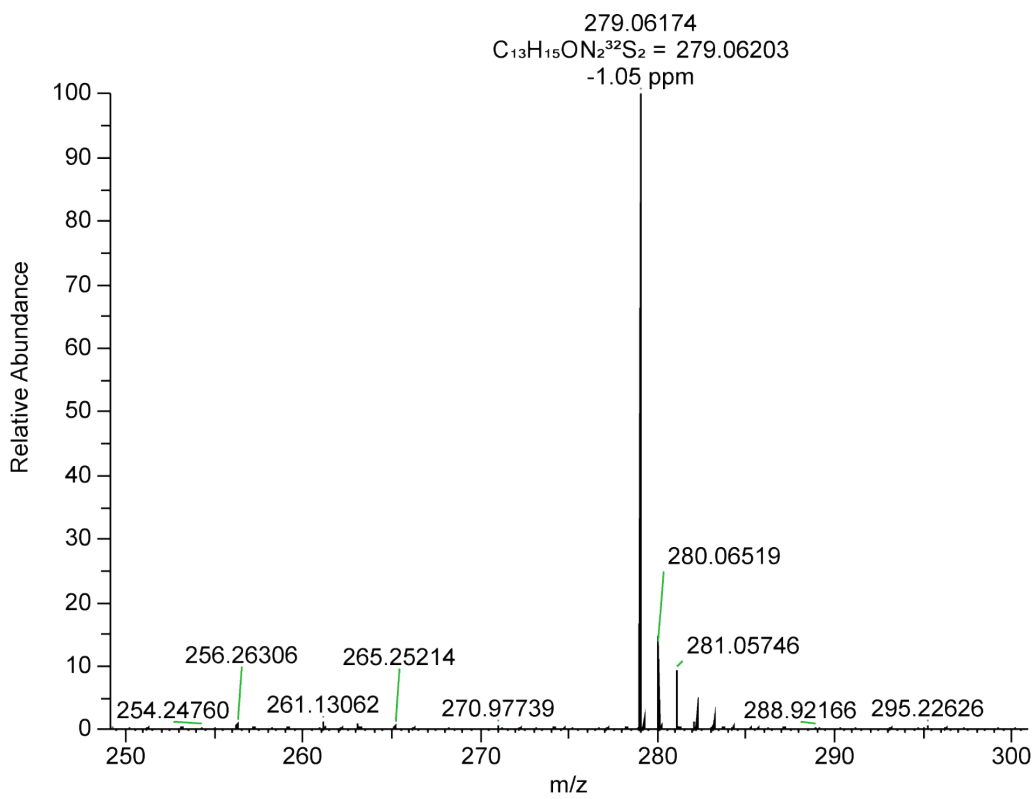

Figure S4.  $^1H$  NMR,  $^{13}C$  NMR and HRMS for E4.

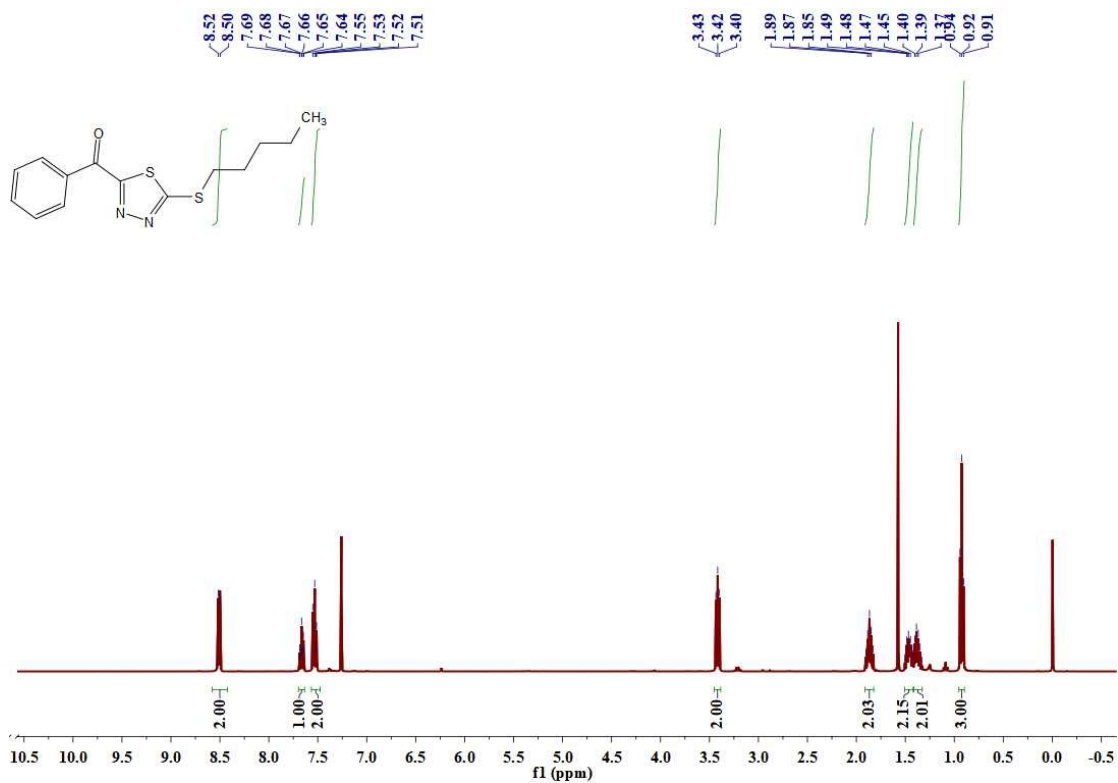

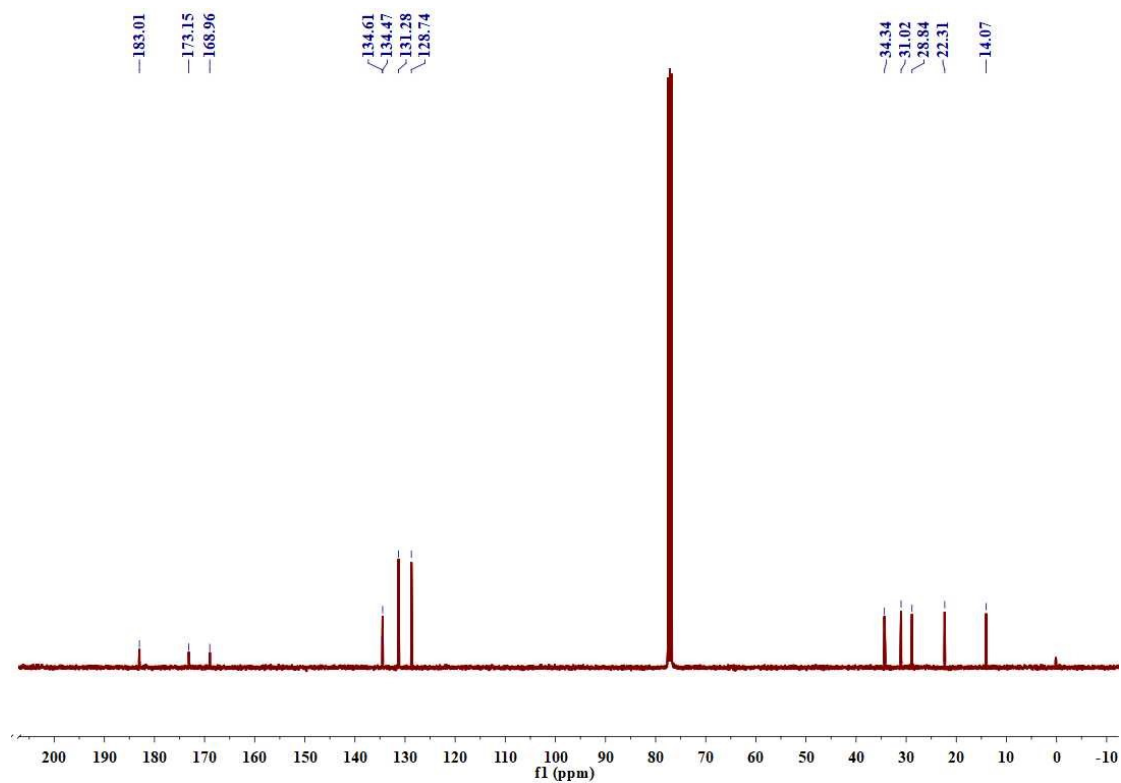

34 #45 RT: 0.45 AV: 1 NL: 4.77E+007  
 T: FTMS + p ESI Full ms [120.0000-1800.0000]

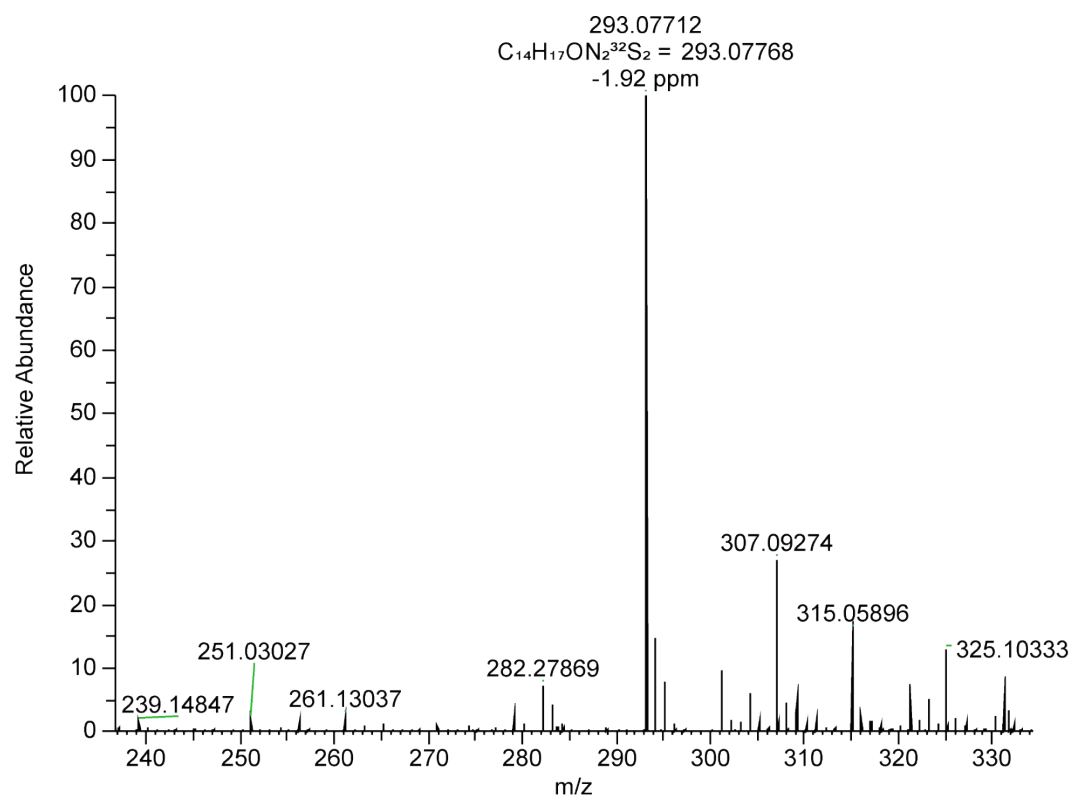

Figure S5.  $^1H$  NMR,  $^{13}C$  NMR and HRMS for E5.



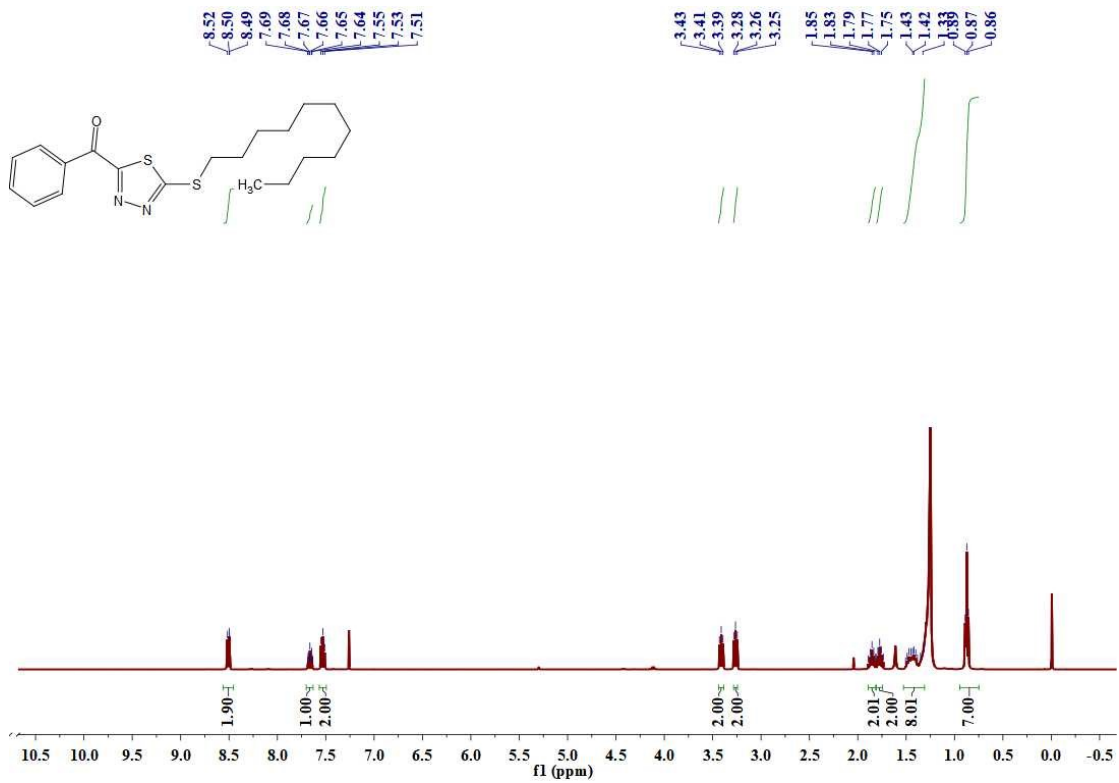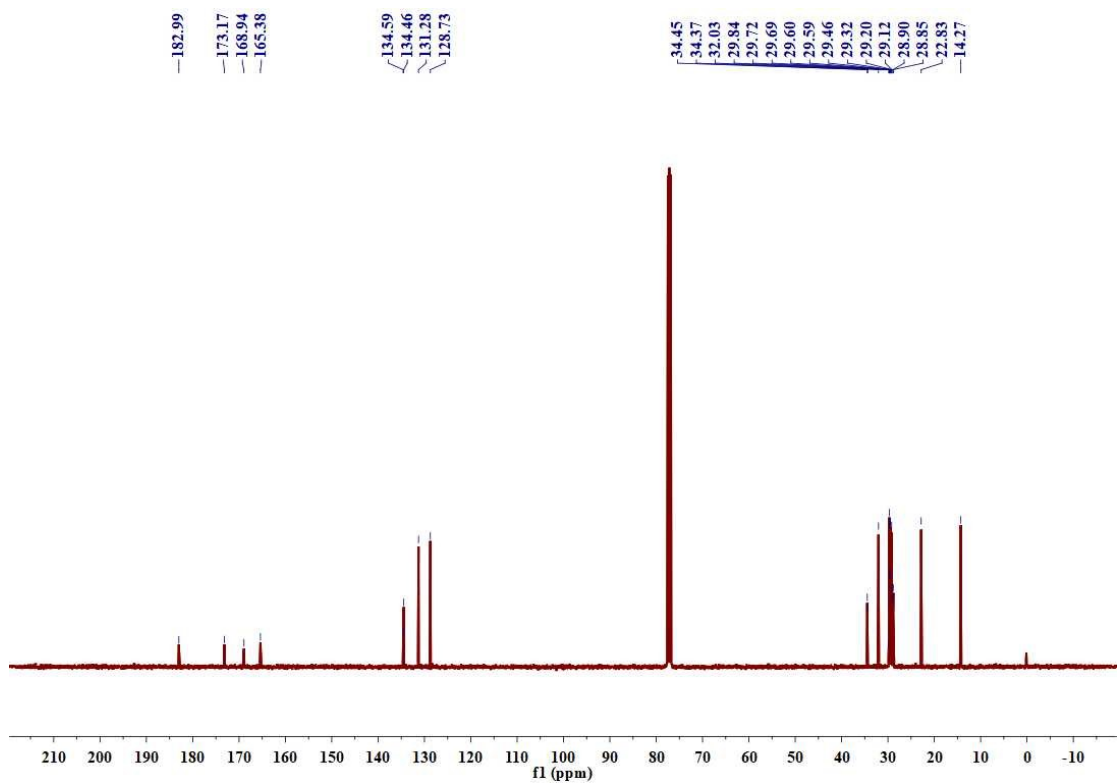

DL-26 #415 RT: 4.01 AV: 1 NL: 6.16E+007  
T: FTMS + p ESI Full ms [150.0000-2200.0000]

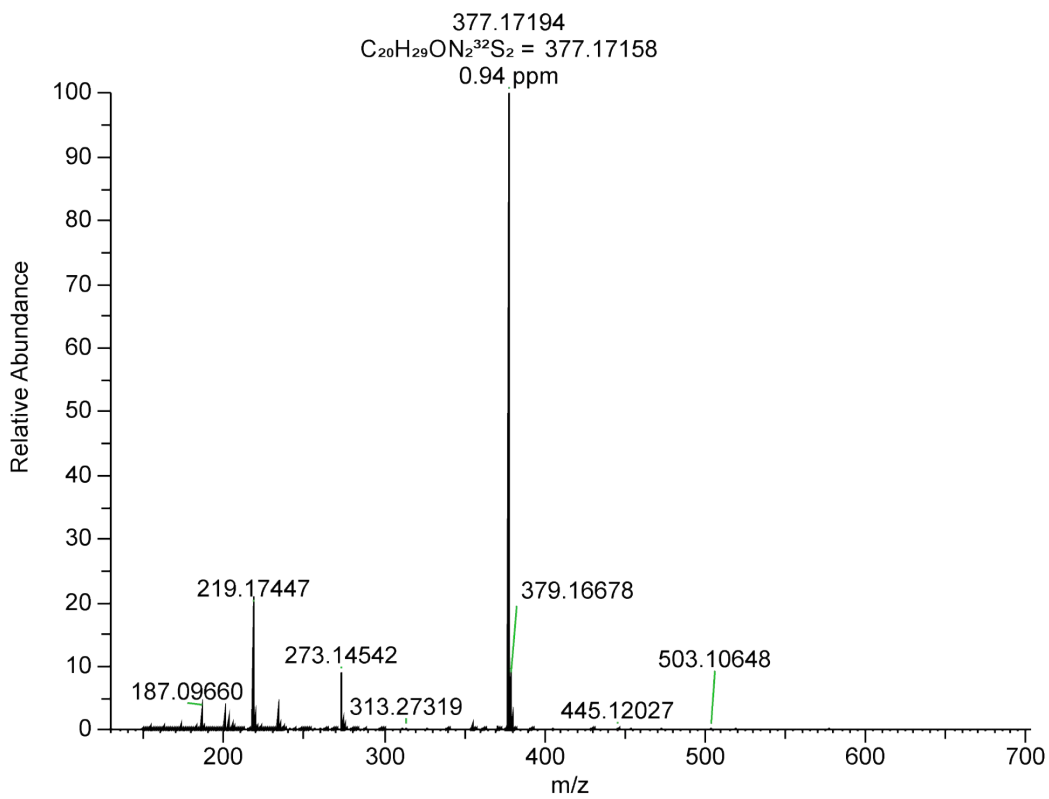

Figure S6.  $^1H$  NMR,  $^{13}C$  NMR and HRMS for E6.

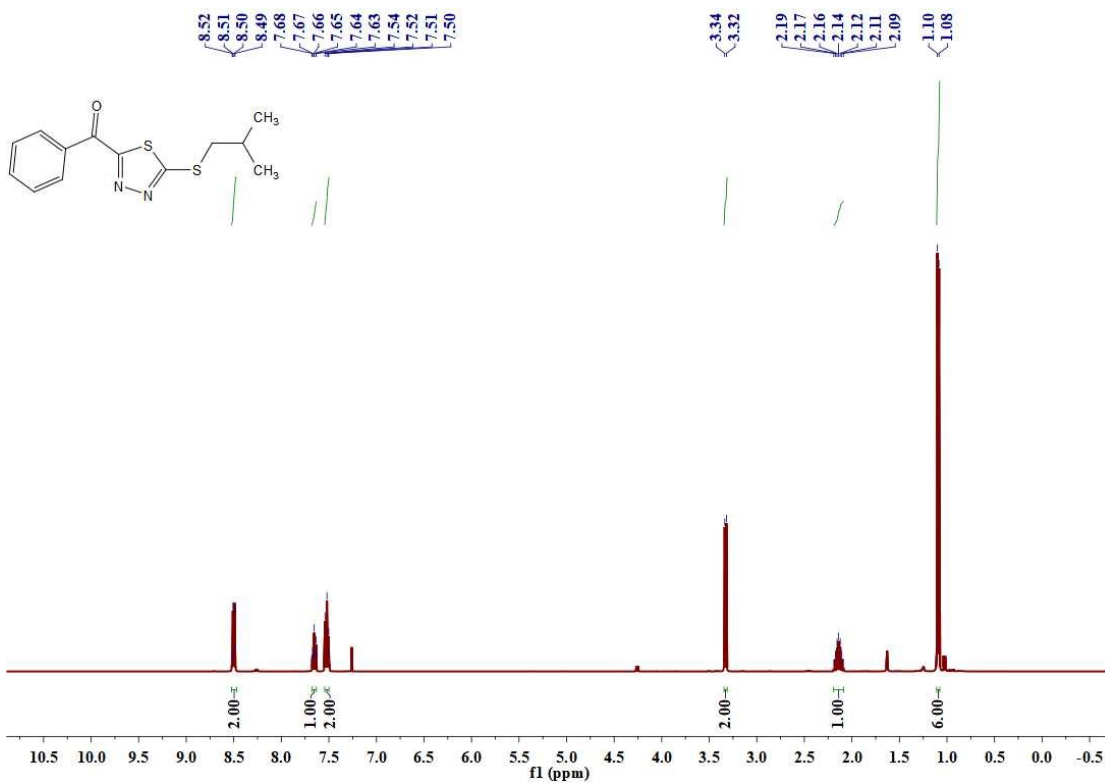

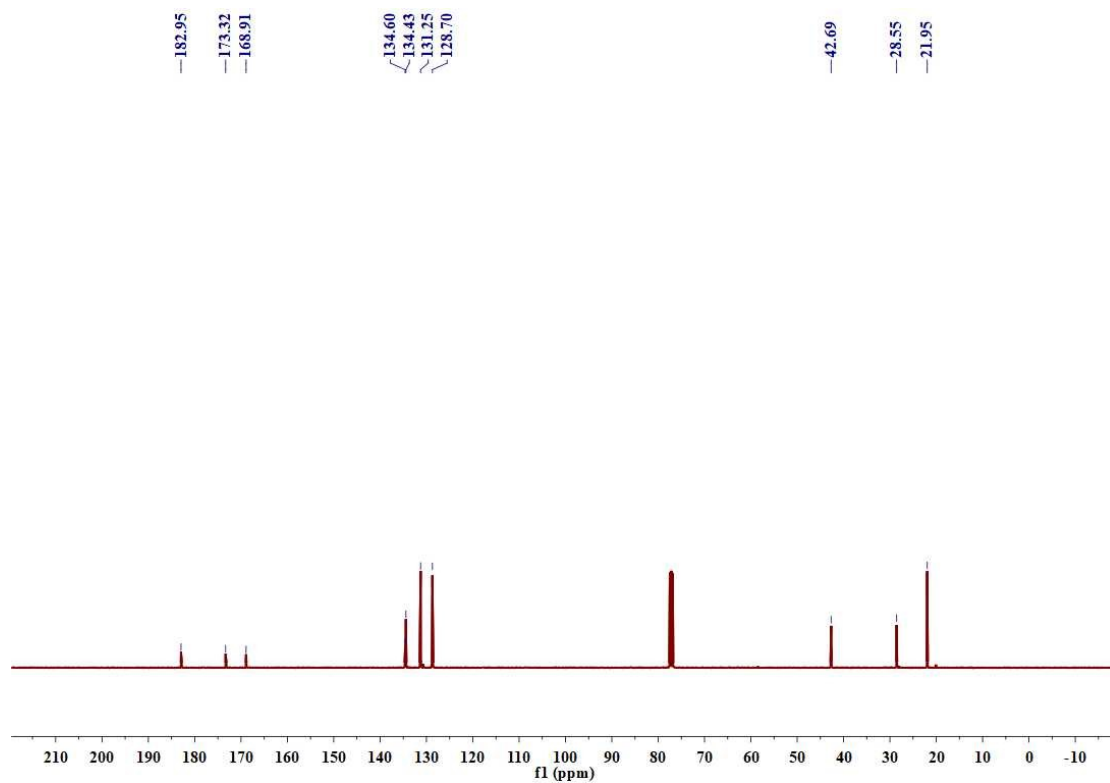

27 #59 RT: 0.58 AV: 1 NL: 4.74E+008  
 T: FTMS + p ESI Full ms [120.0000-1800.0000]

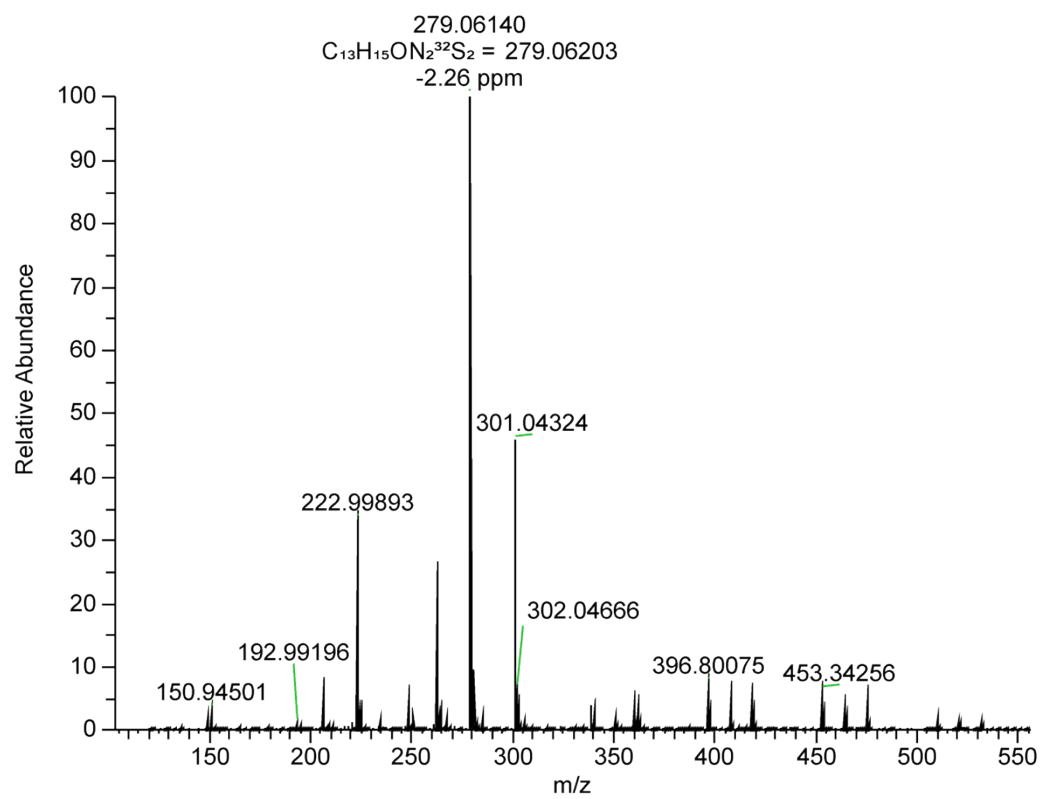

Figure S7.  $^1H$  NMR,  $^{13}C$  NMR and HRMS for E7.

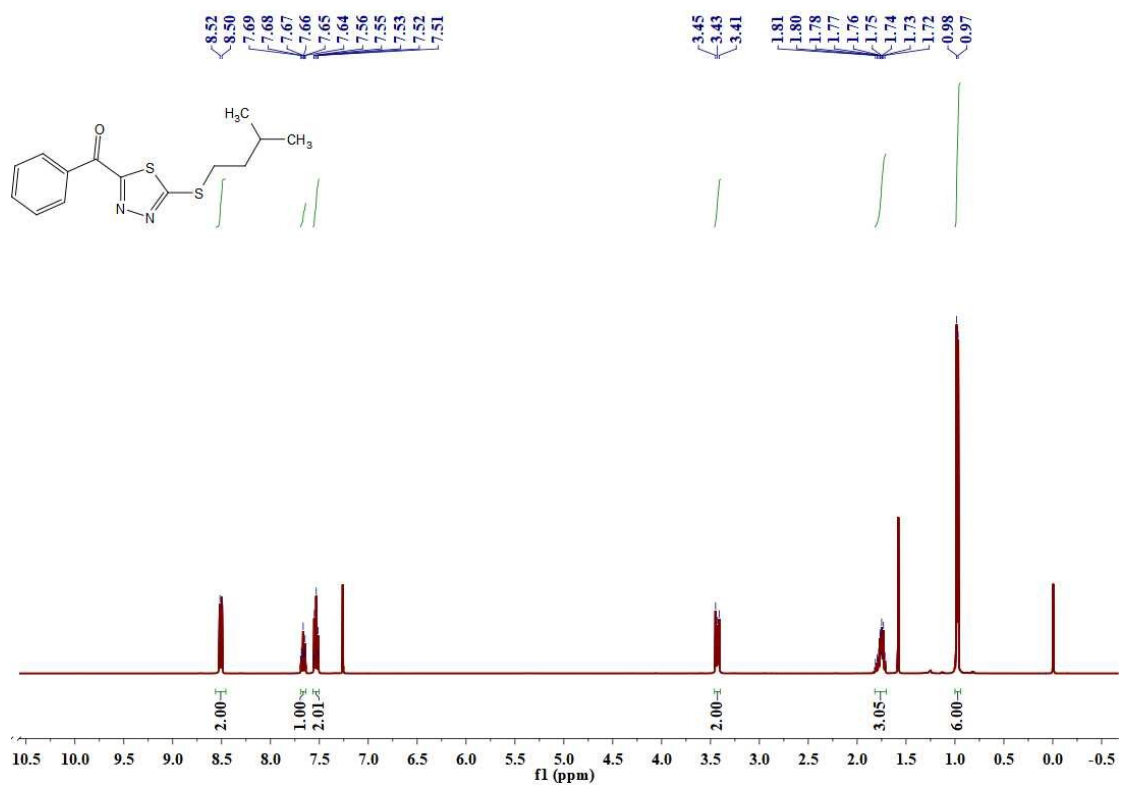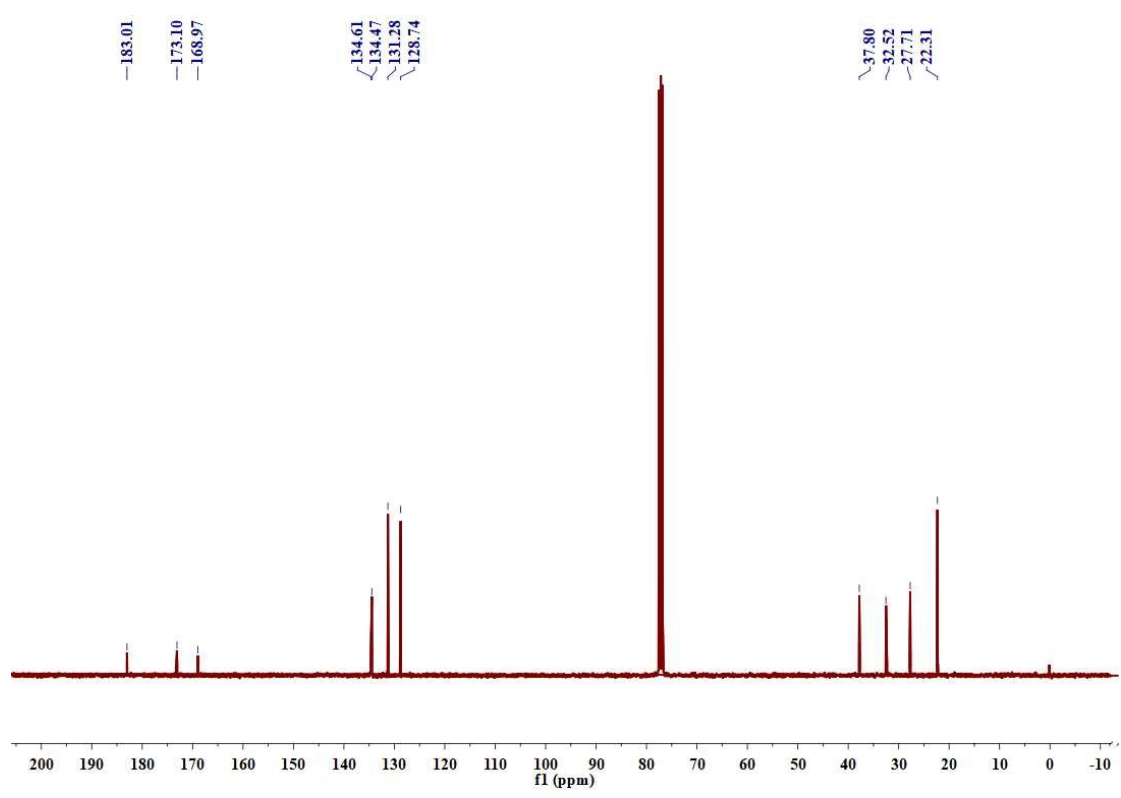

35 #107 RT: 1.05 AV: 1 NL: 2.14E+007  
T: FTMS + p ESI Full ms [120.0000-1800.0000]

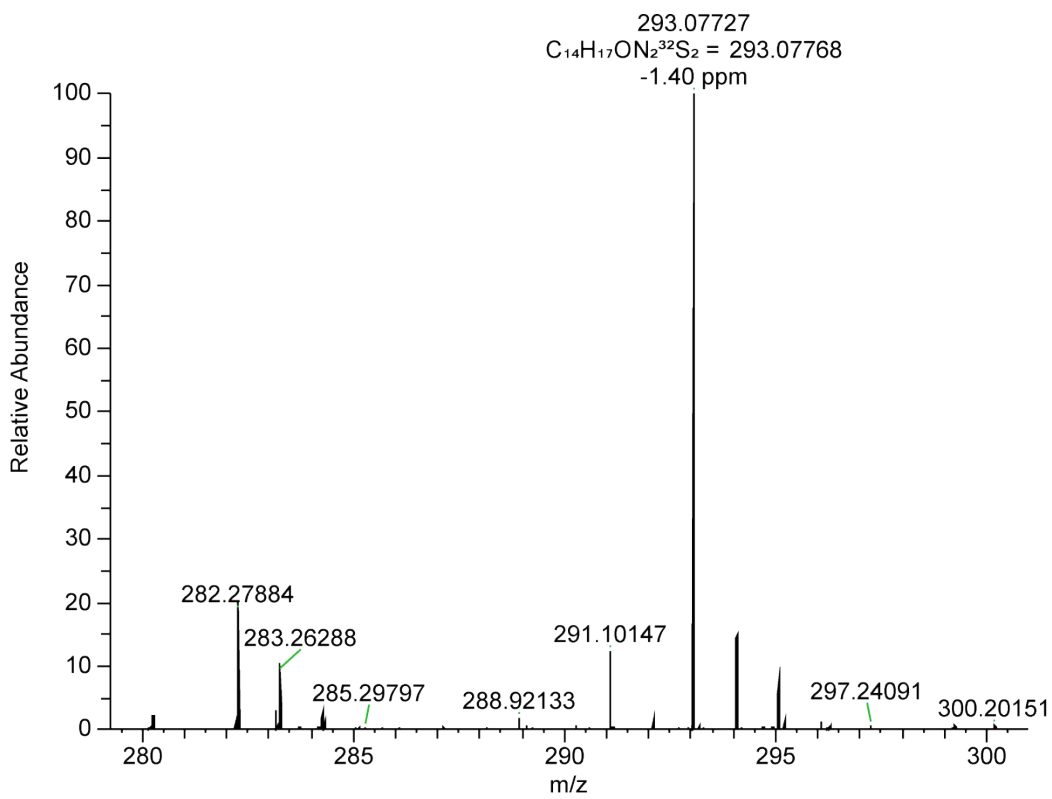

Figure S8.  $^1H$  NMR,  $^{13}C$  NMR and HRMS for E8.

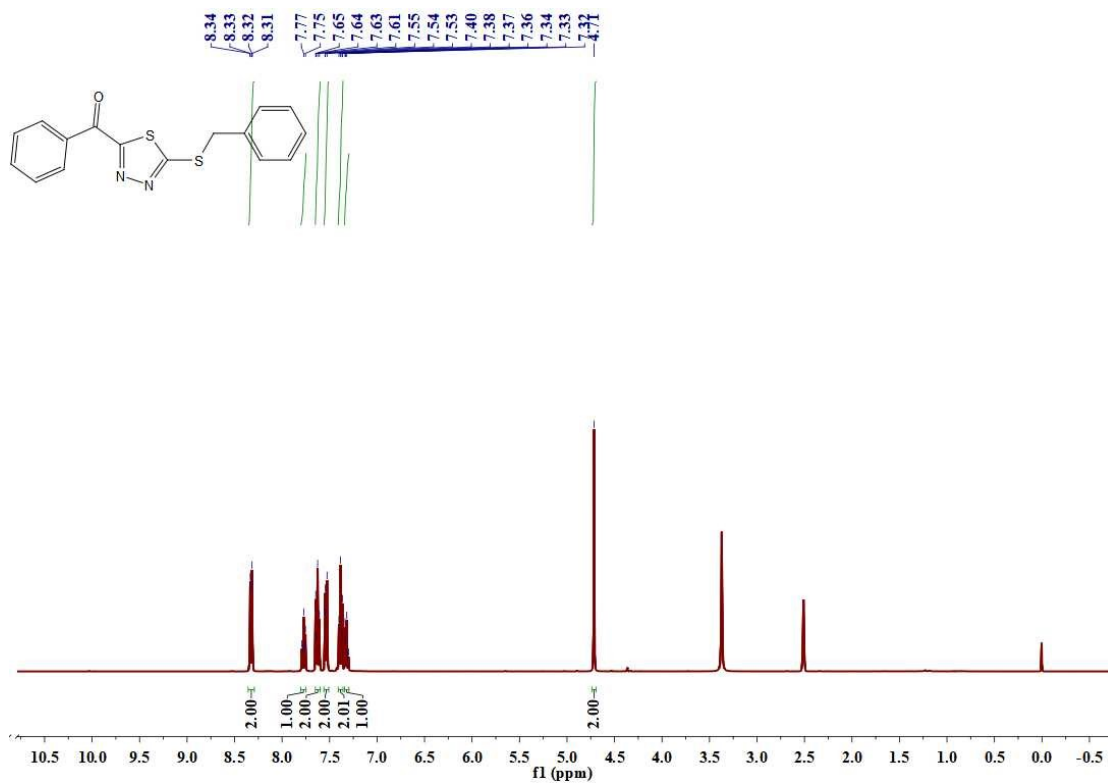

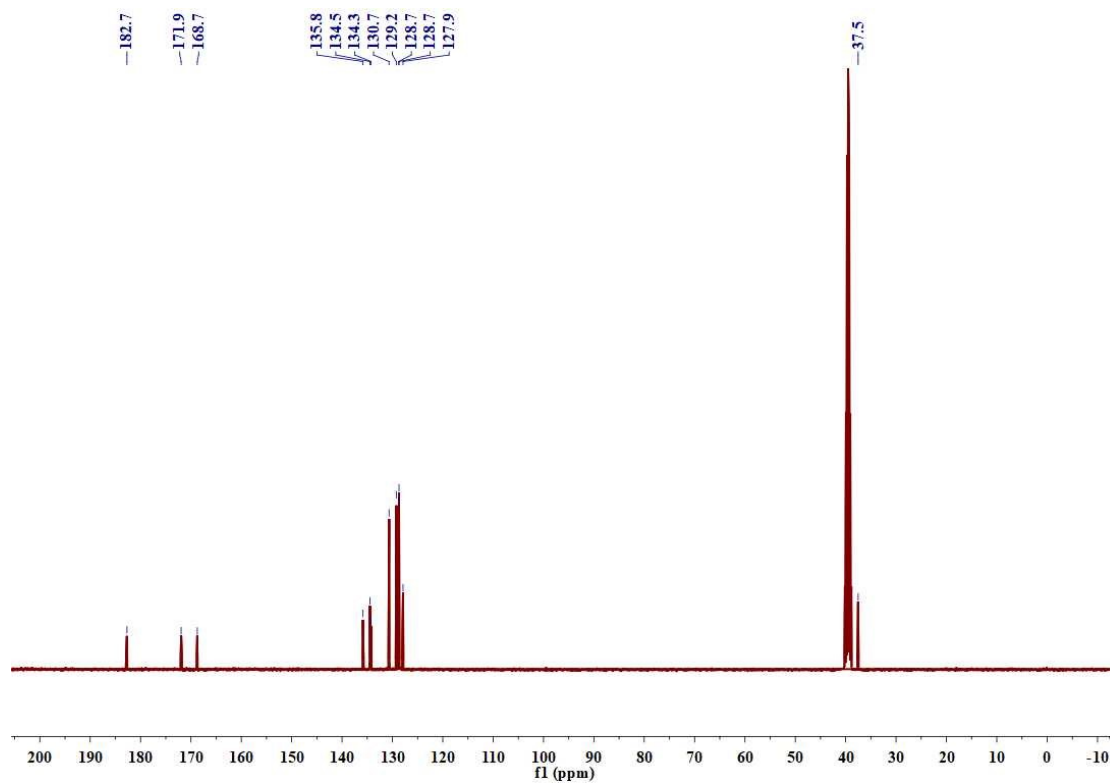

23 #69 RT: 0.72 AV: 1 NL: 2.35E+007  
 T: FTMS + p ESI Full ms [120.0000-1800.0000]

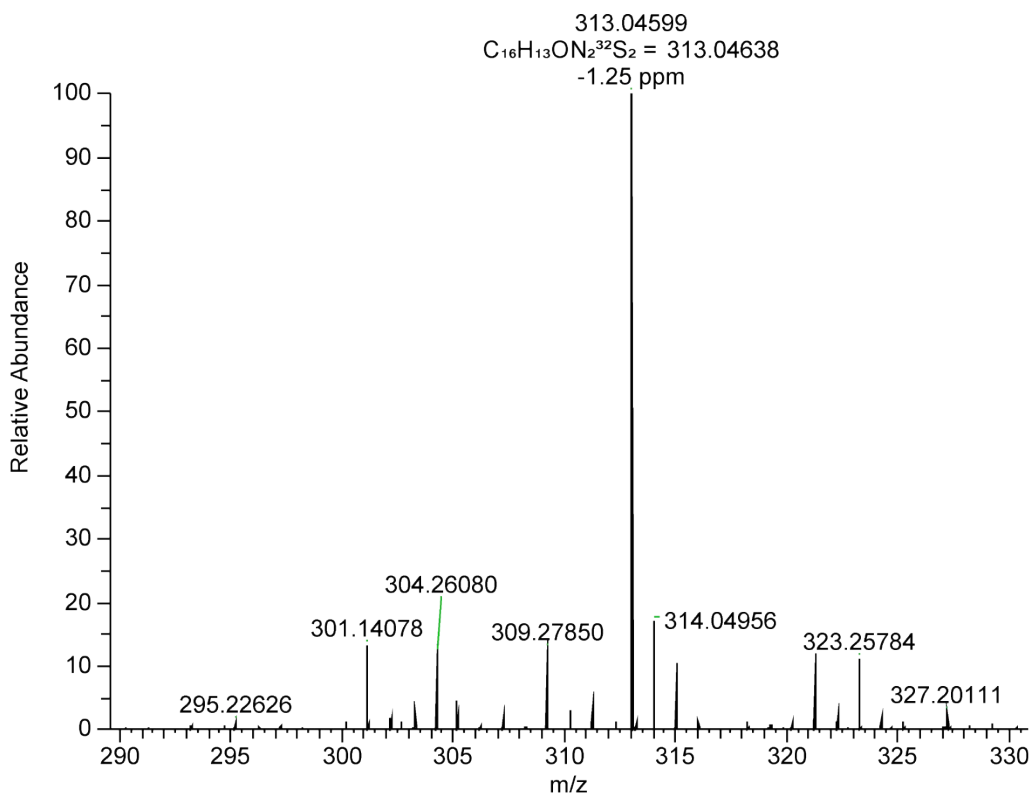

Figure S9.  $^1\text{H}$  NMR,  $^{13}\text{C}$  NMR and HRMS for E9.

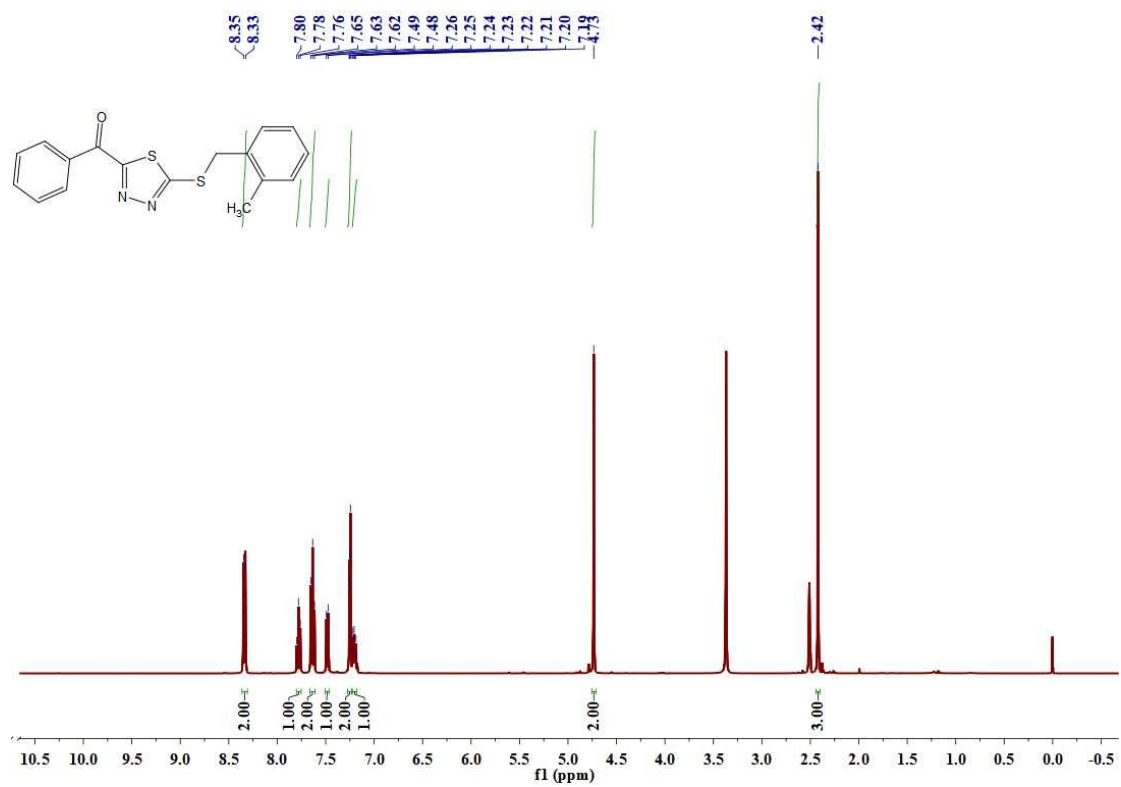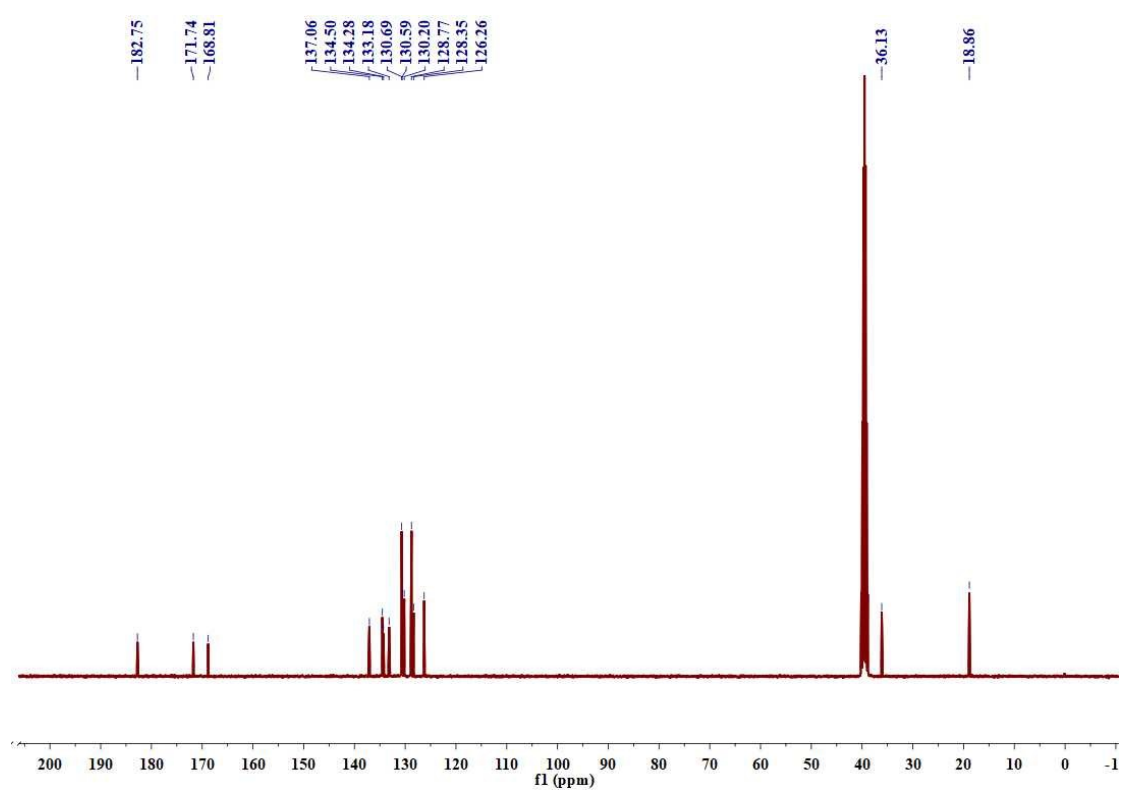

27 #41 RT: 0.42 AV: 1 NL: 2.43E+007  
T: FTMS + p ESI Full ms [120.0000-1800.0000]

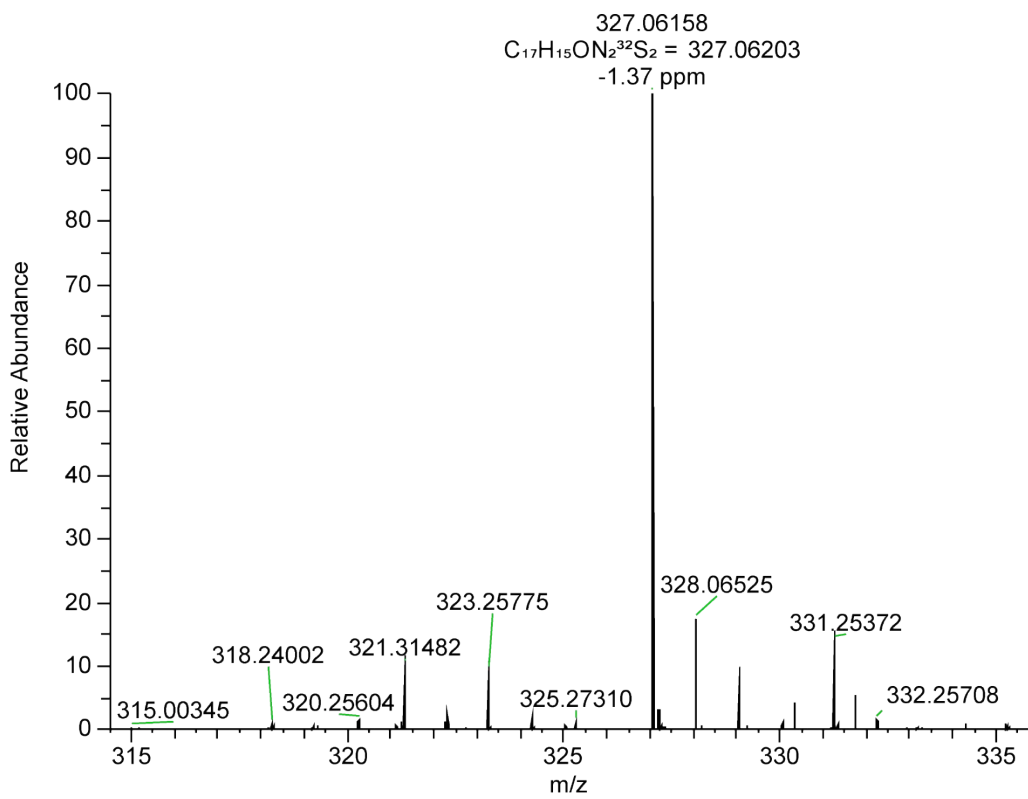

Figure S10.  $^1H$  NMR,  $^{13}C$  NMR and HRMS for E10.

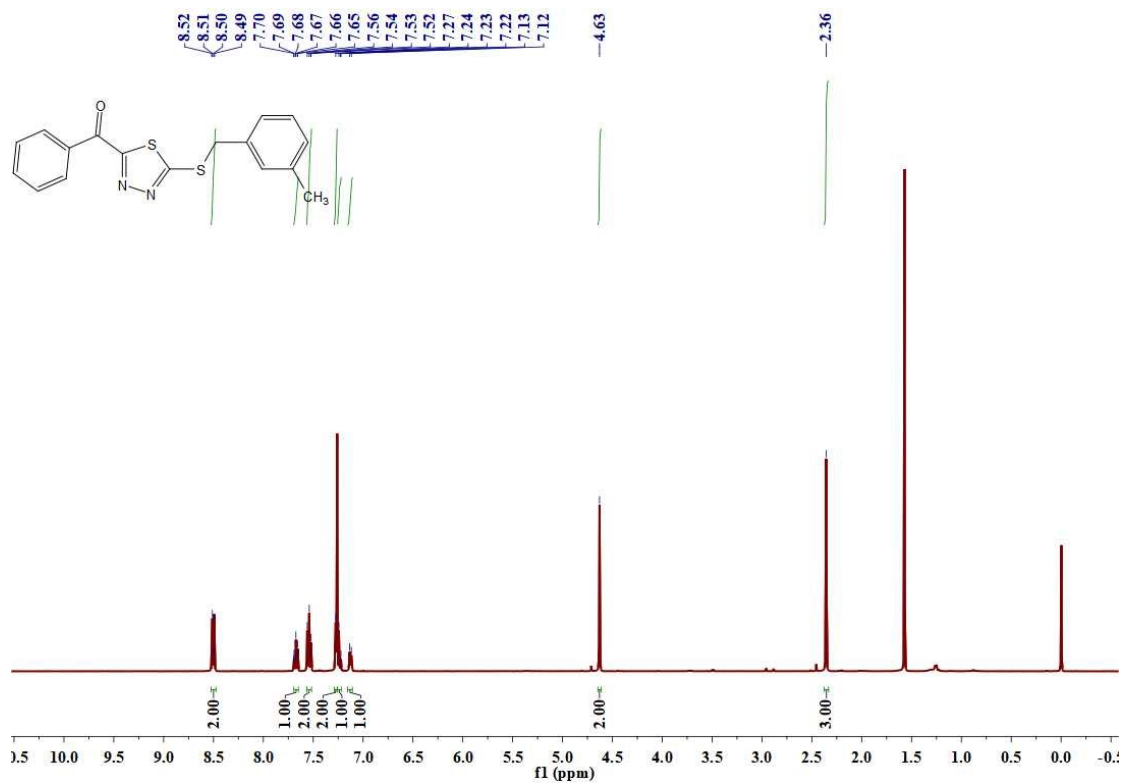



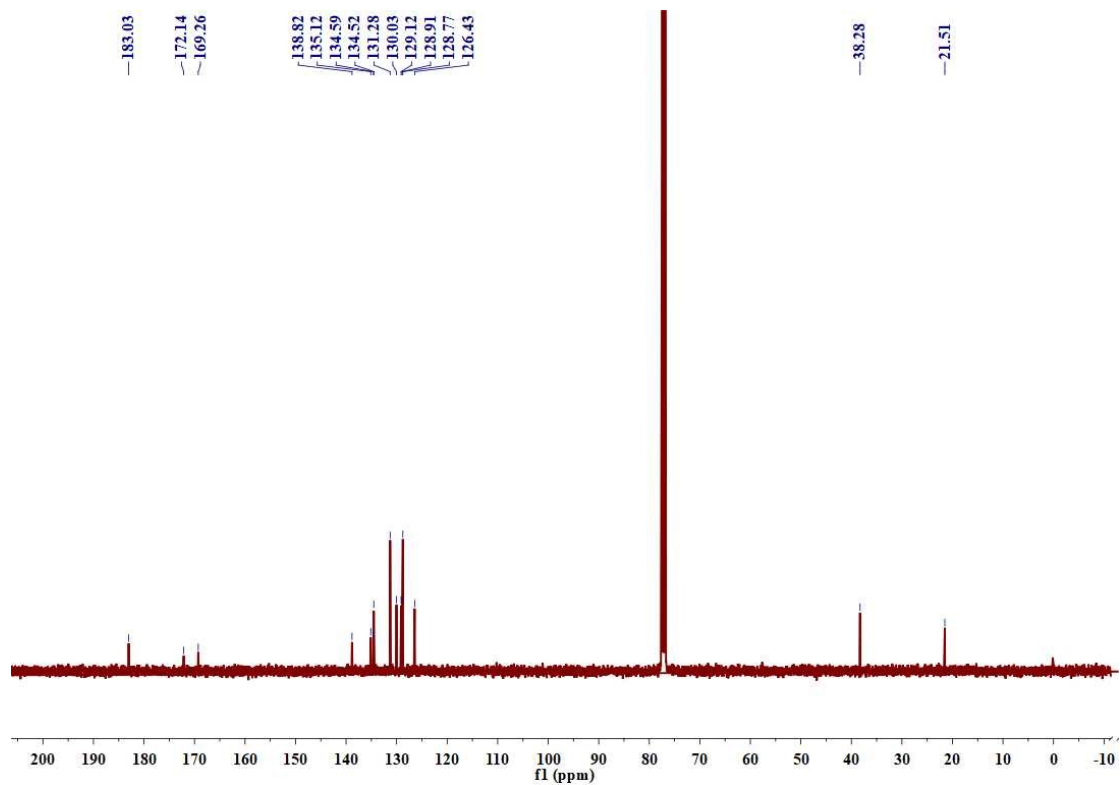

28 #77 RT: 0.78 AV: 1 NL: 3.40E+007  
 T: FTMS + p ESI Full ms [120.0000-1800.0000]

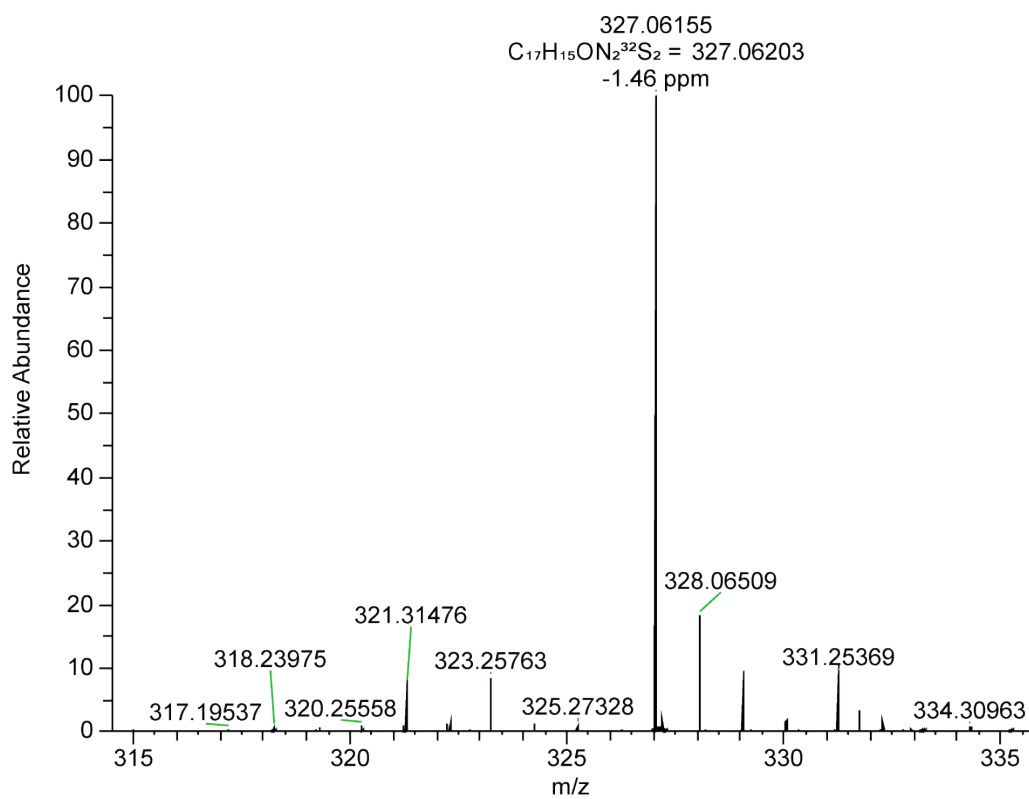

Figure S11.  $^1H$  NMR,  $^{13}C$  NMR and HRMS for E11.

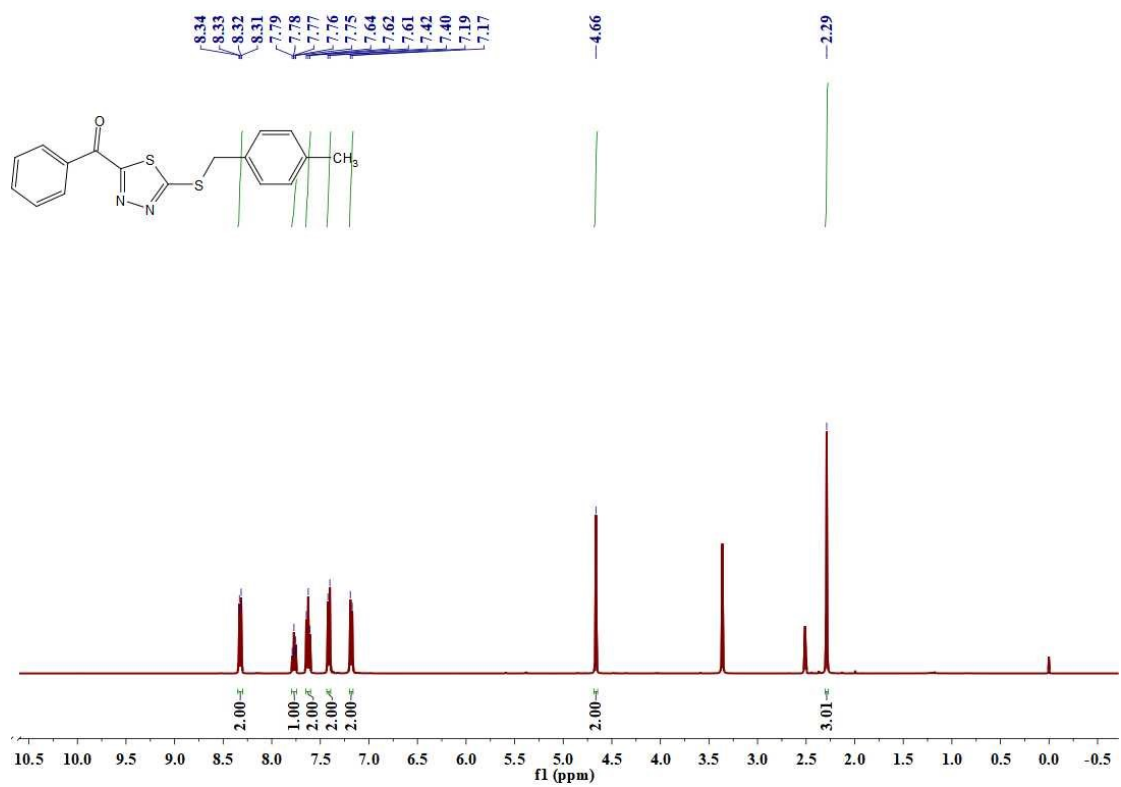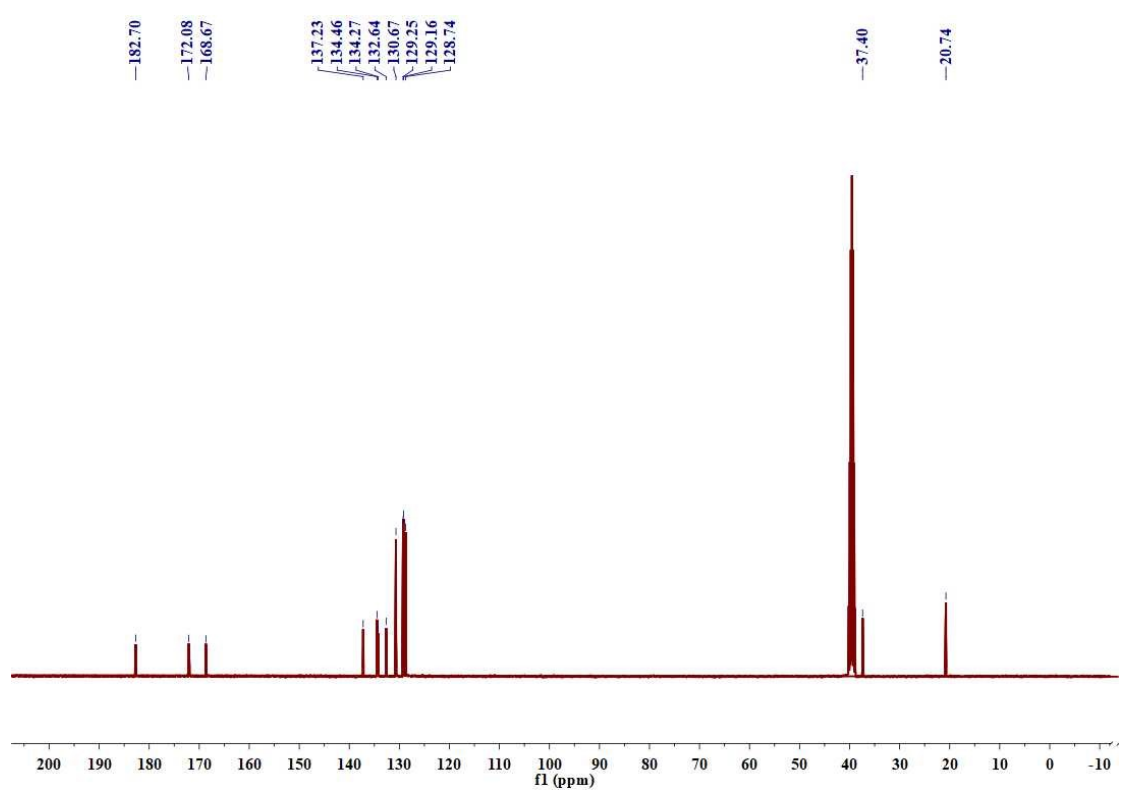

29 #41 RT: 0.41 AV: 1 NL: 1.75E+007  
T: FTMS + p ESI Full ms [120.0000-1800.0000]

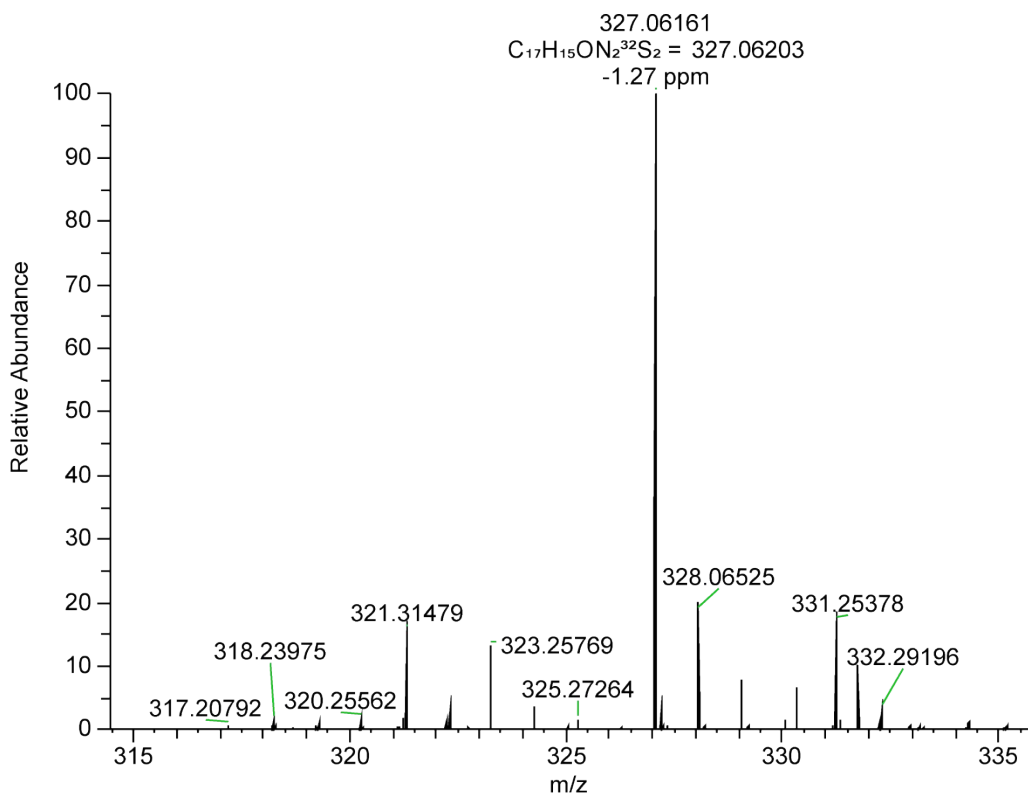

Figure S12.  $^1H$  NMR,  $^{13}C$  NMR and HRMS for E12.

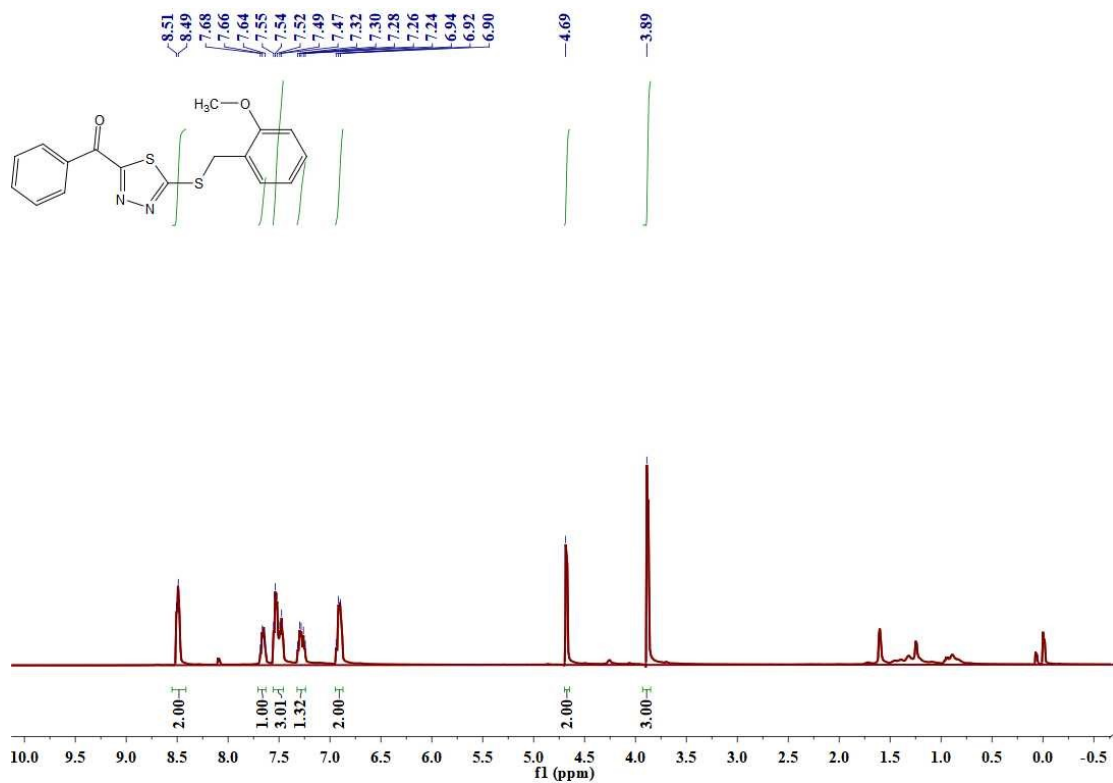

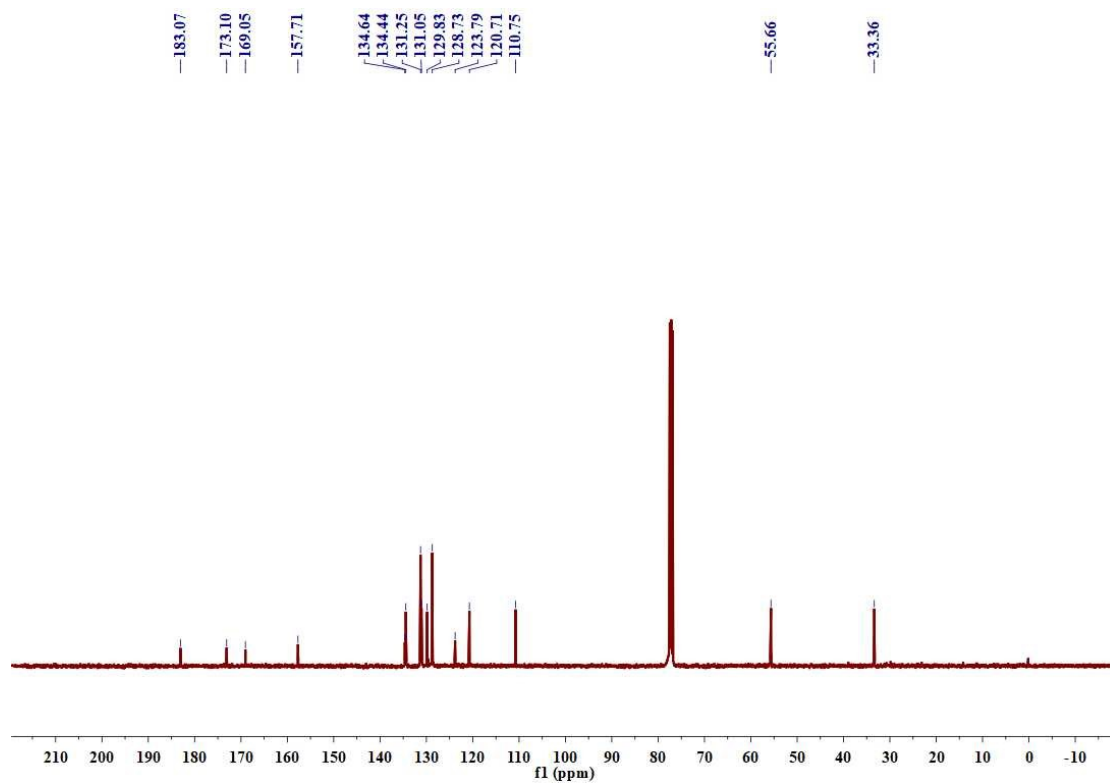

29 #51 RT: 0.58 AV: 1 NL: 4.81E+006  
 T: FTMS + p ESI Full ms [150.0000-2200.0000]

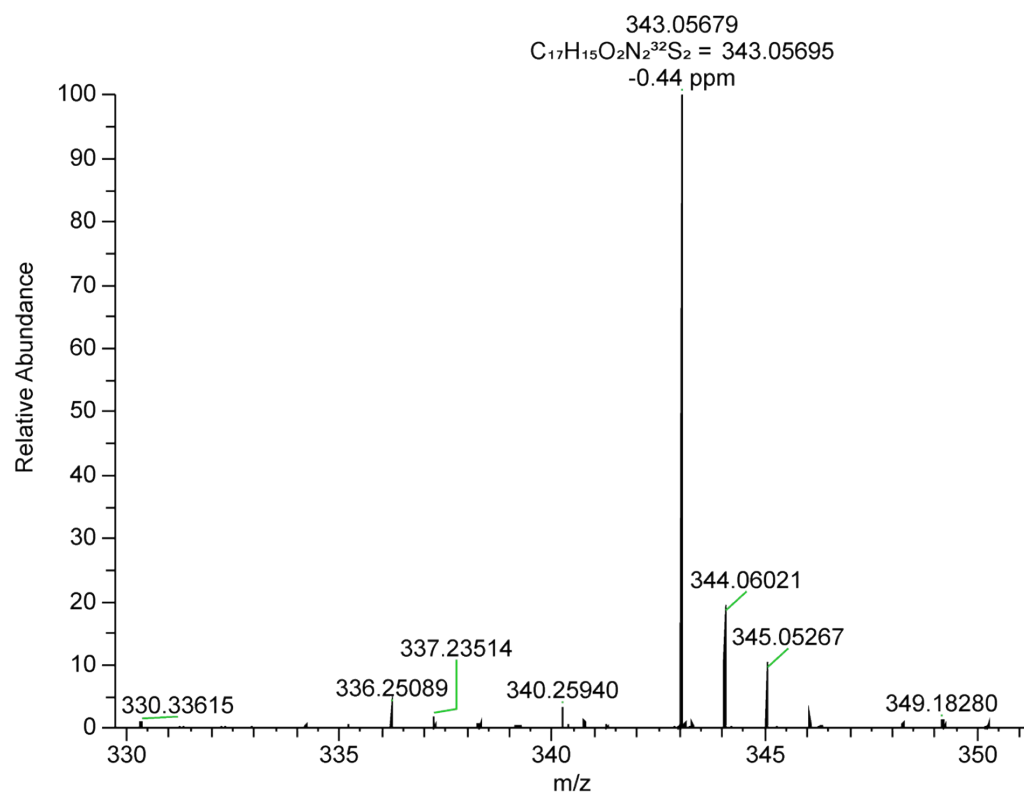

**Figure S13.**  $^1H$  NMR,  $^{13}C$  NMR and HRMS for **E13**.

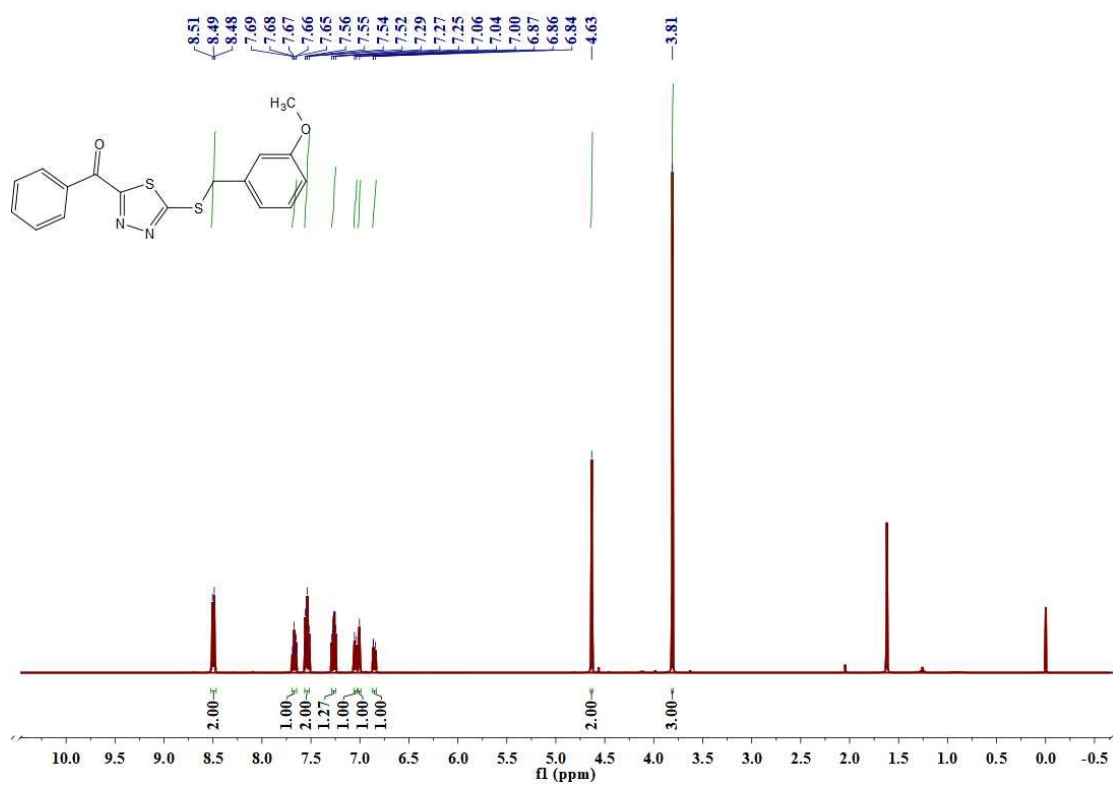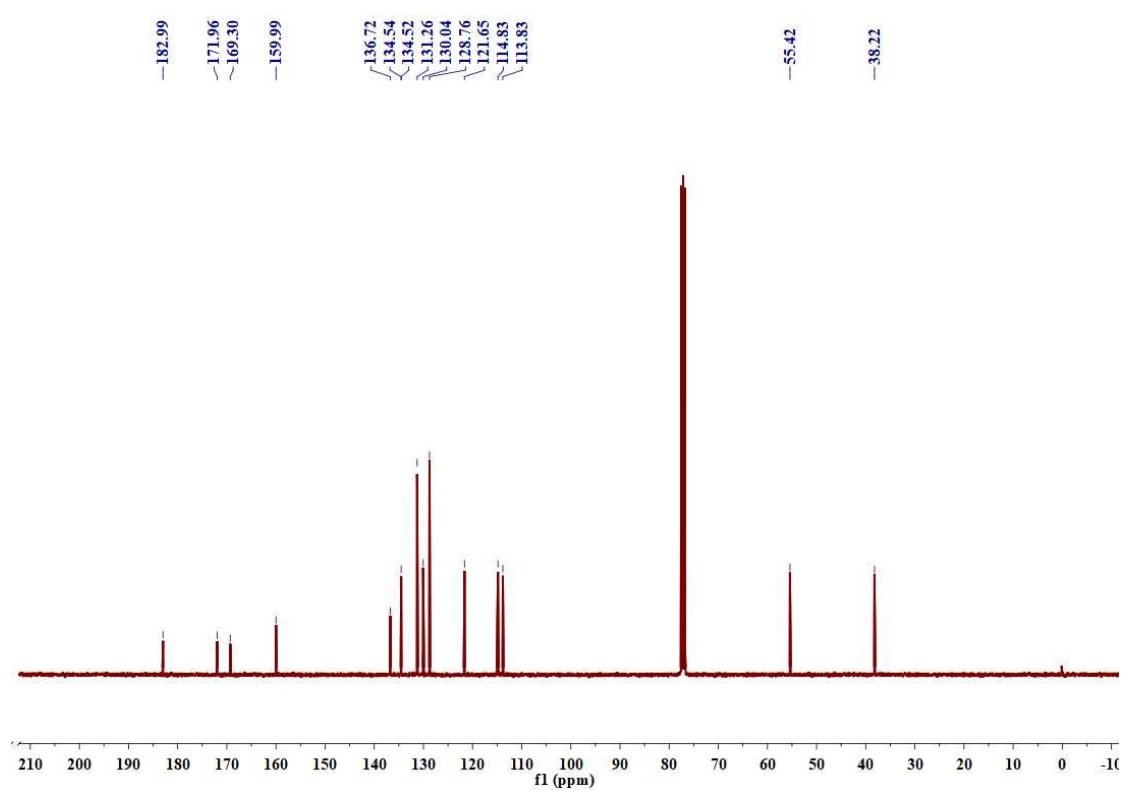

28 #55 RT: 0.54 AV: 1 NL: 1.43E+008  
T: FTMS + p ESI Full ms [120.0000-1800.0000]

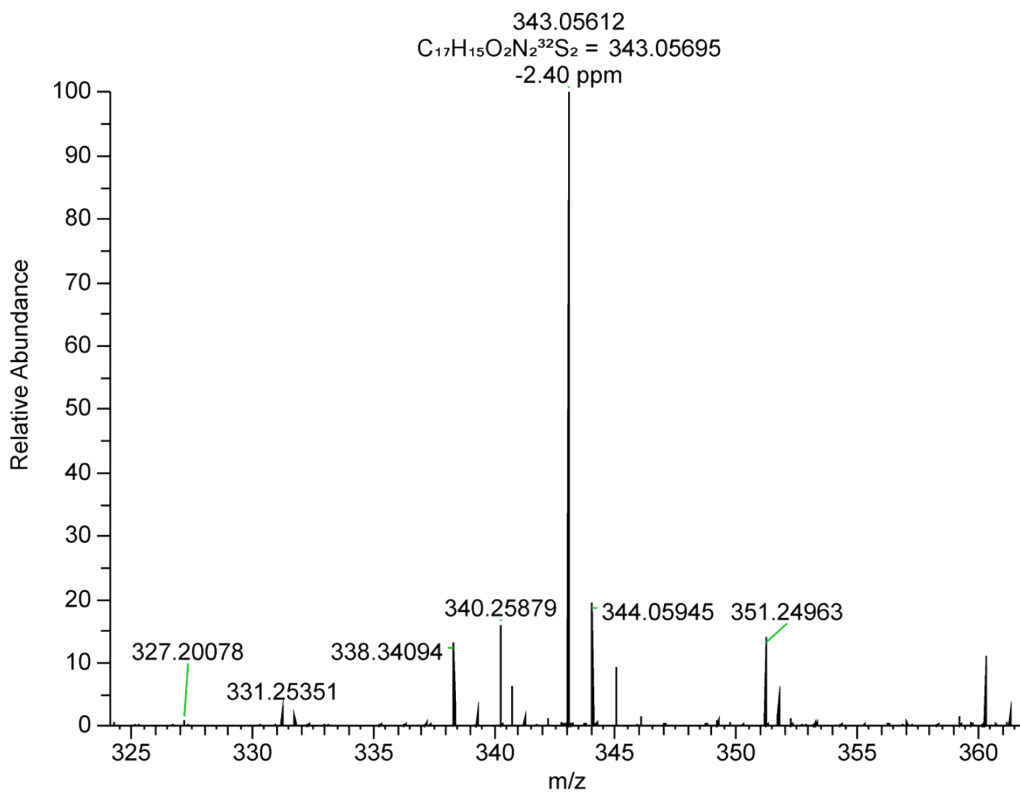

Figure S14.  $^1H$  NMR,  $^{13}C$  NMR and HRMS for E14.

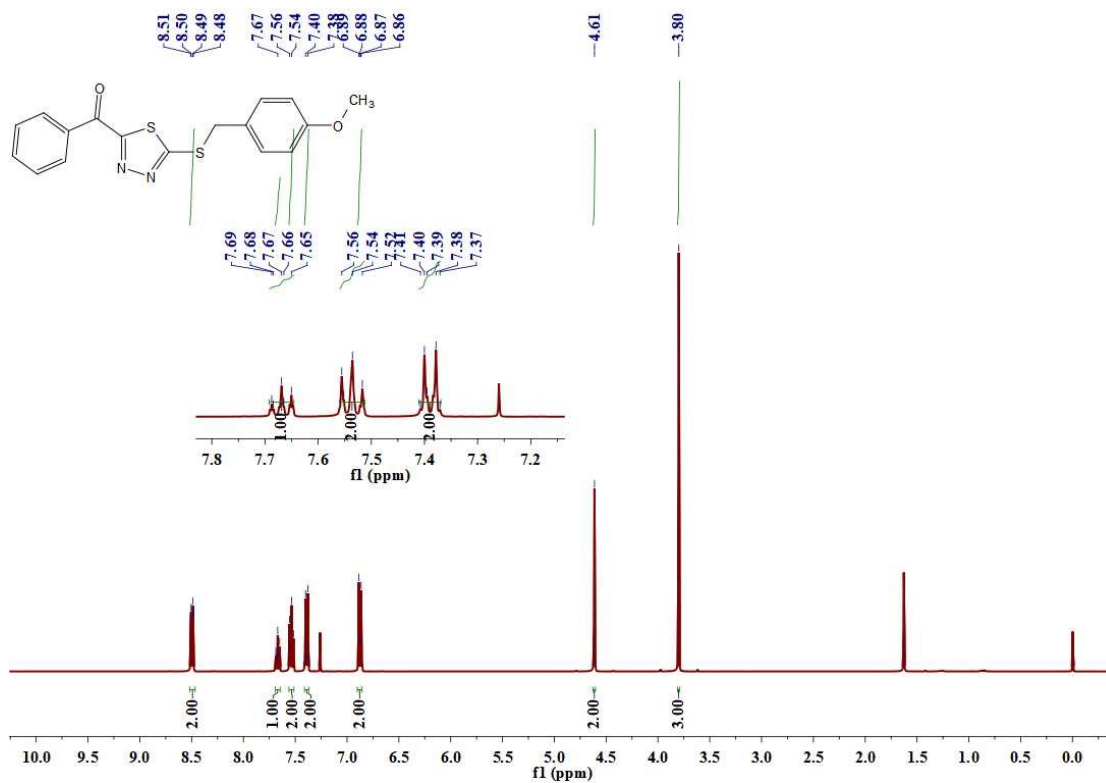

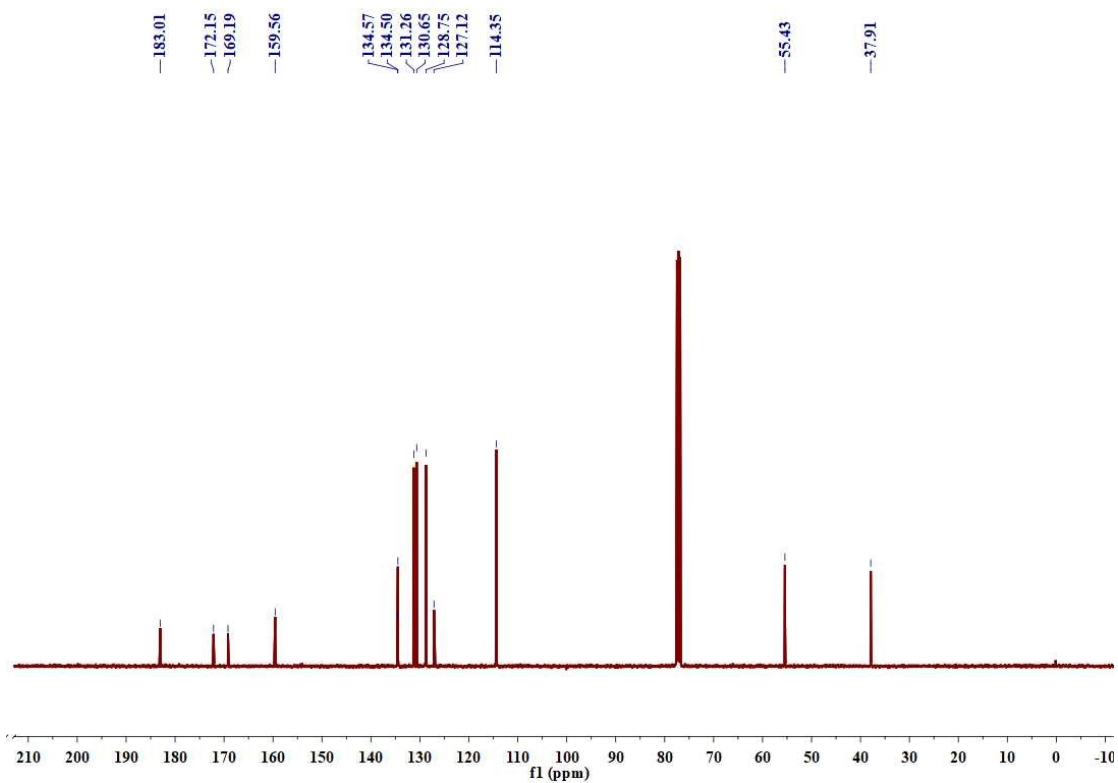

30 #5 RT: 0.05 AV: 1 NL: 3.63E+005  
 T: FTMS + p ESI Full ms [120.0000-1800.0000]

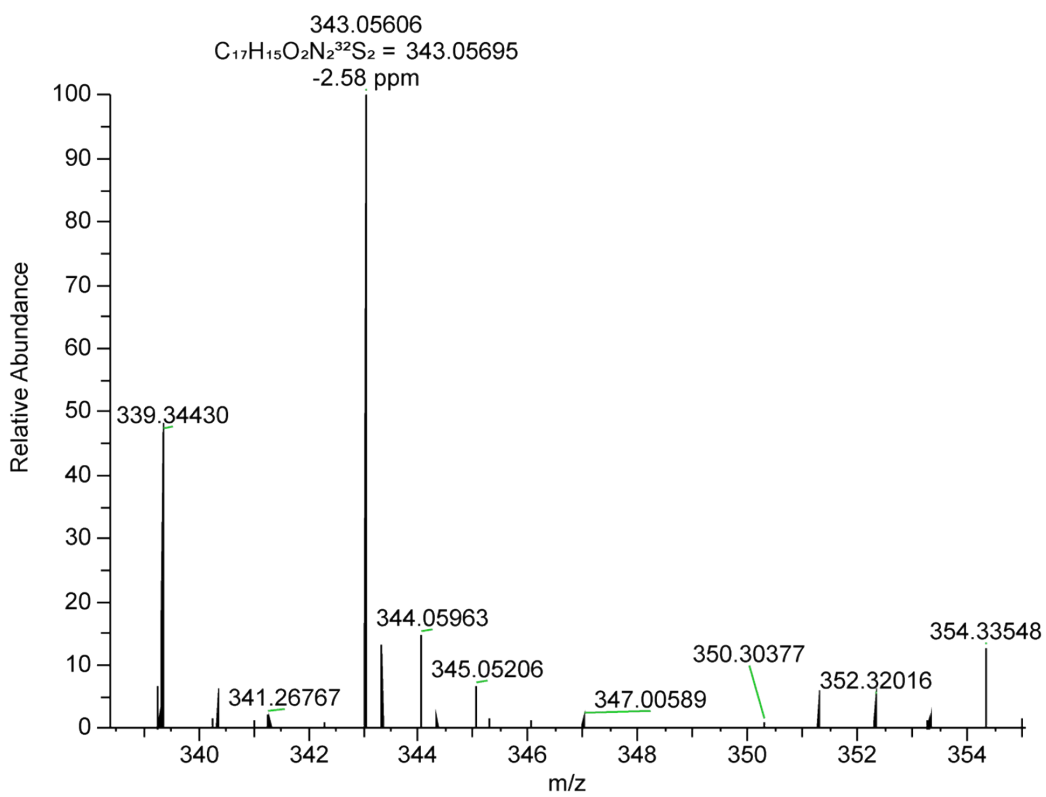

**Figure S15.**  $^1H$  NMR,  $^{13}C$  NMR and HRMS for **E15**.

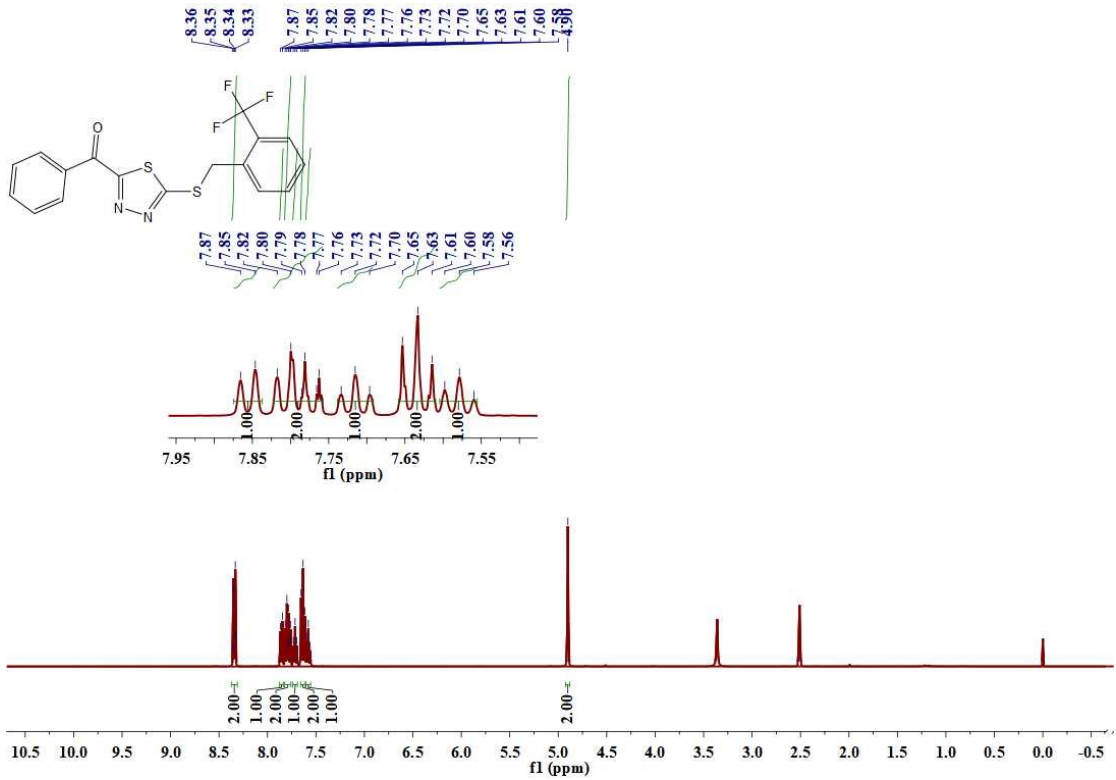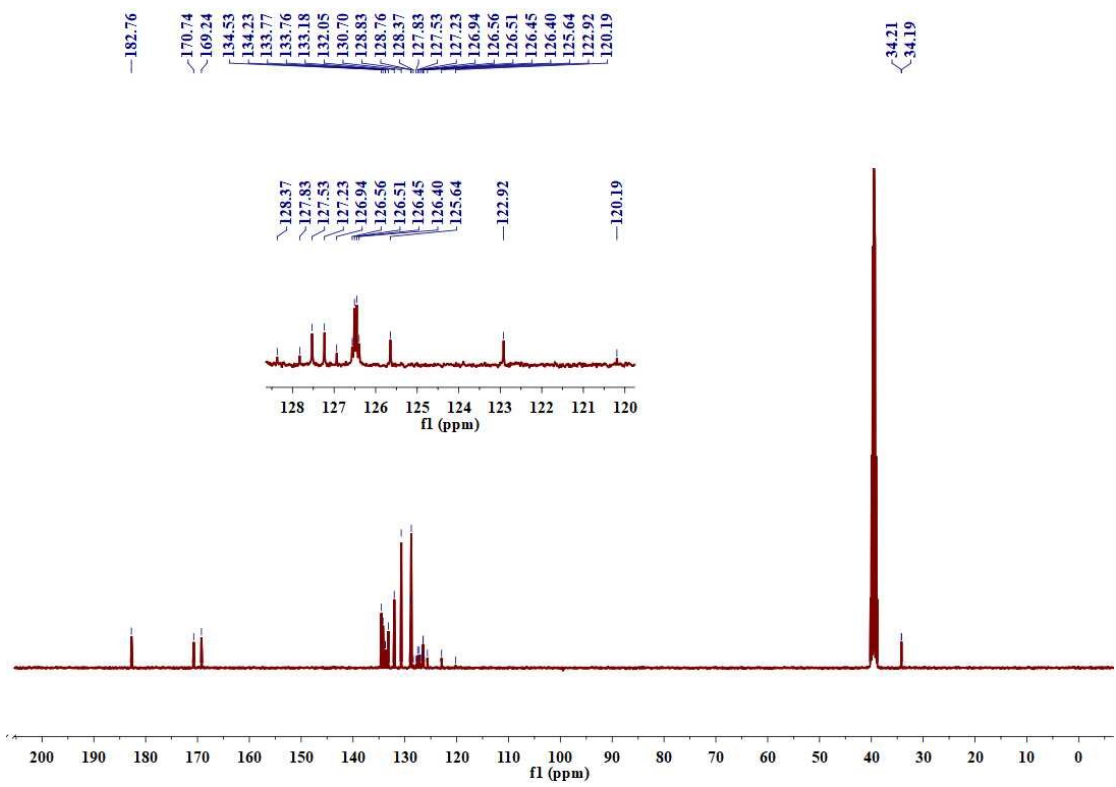



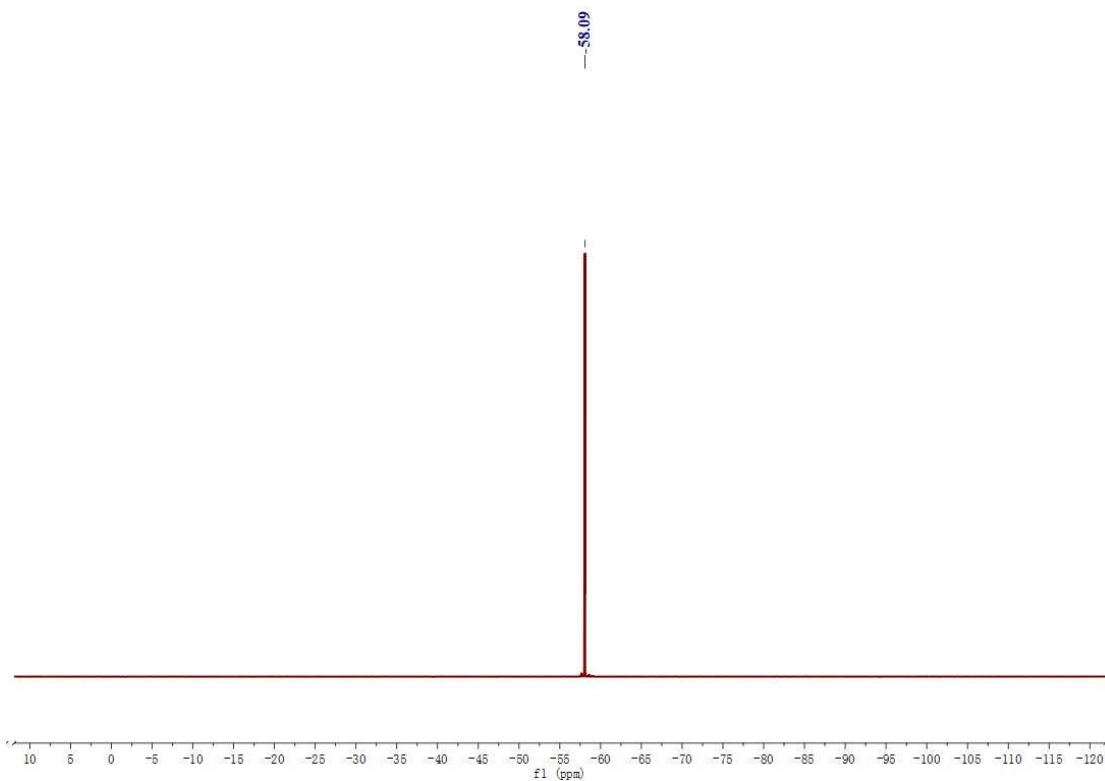

20 #57 RT: 0.65 AV: 1 NL: 2.00E+008  
T: FTMS + p ESI Full ms [120.0000-1800.0000]

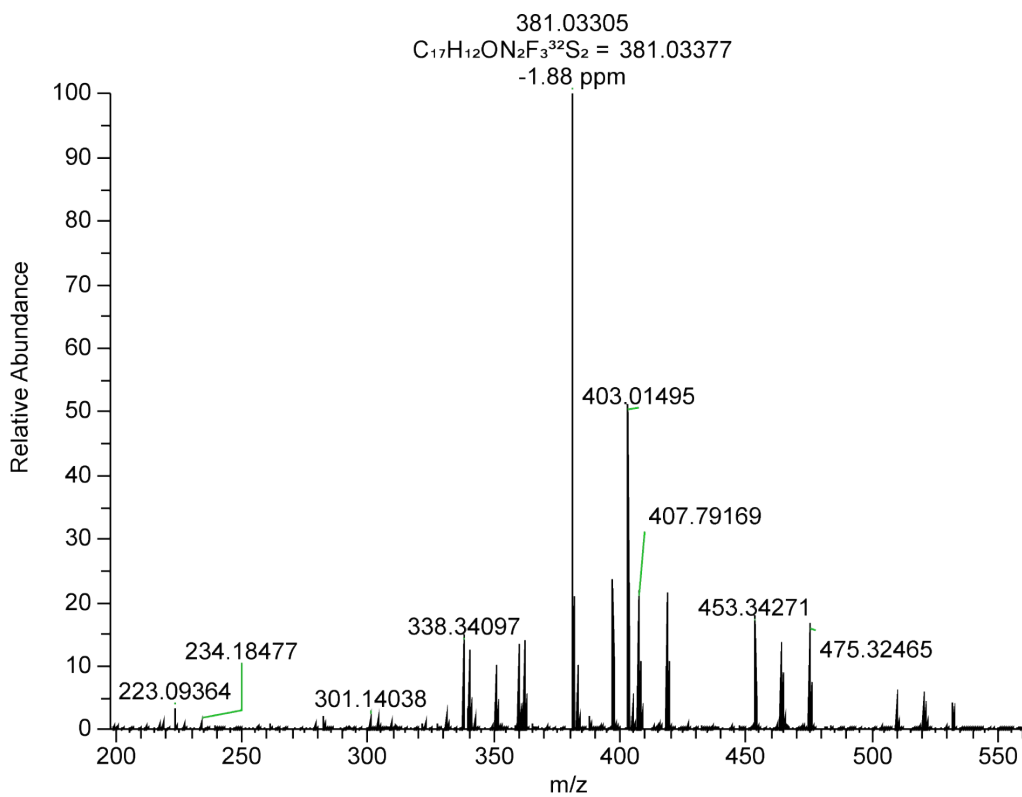

**Figure S16.**  $^1\text{H}$  NMR,  $^{13}\text{C}$  NMR,  $^{19}\text{F}$  NMR and HRMS for **E16**.

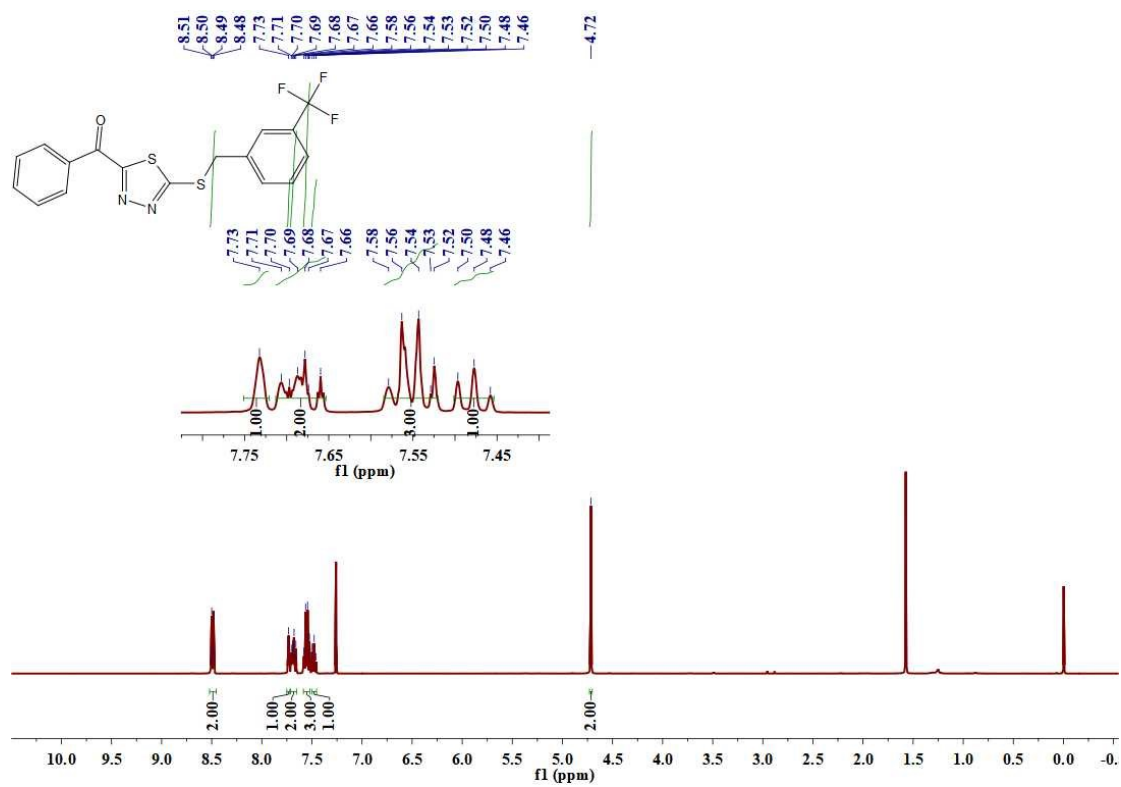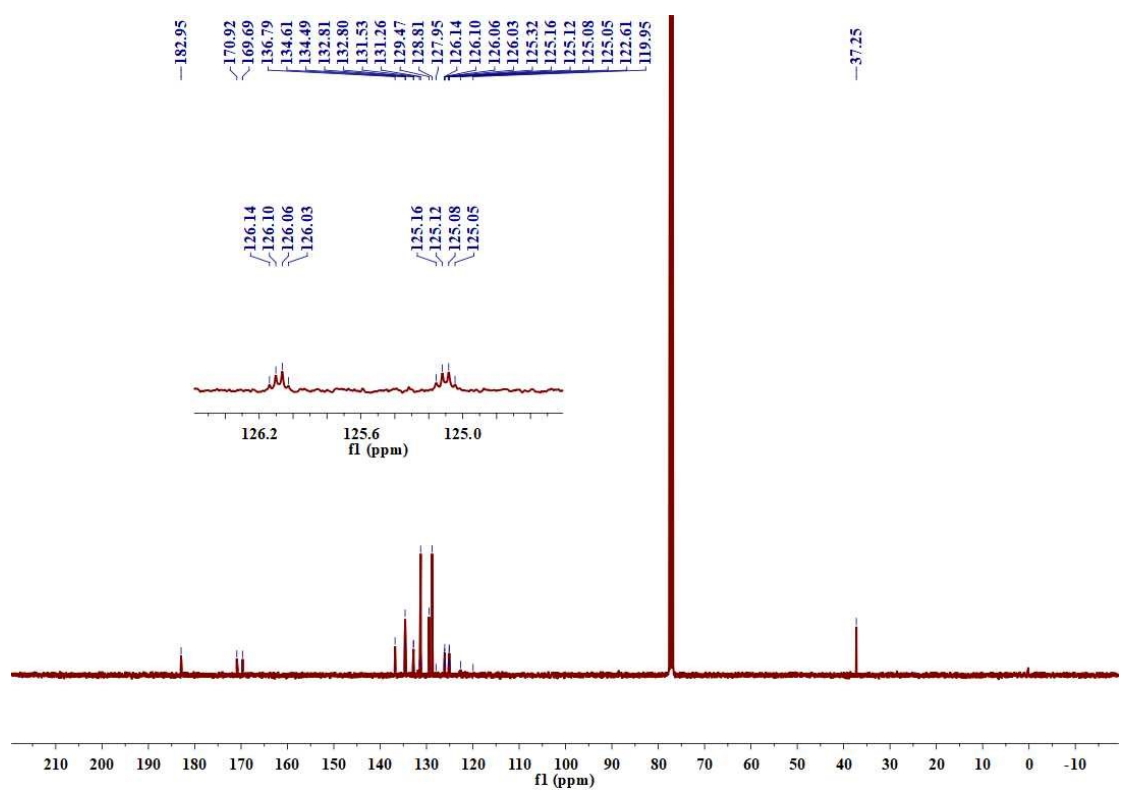

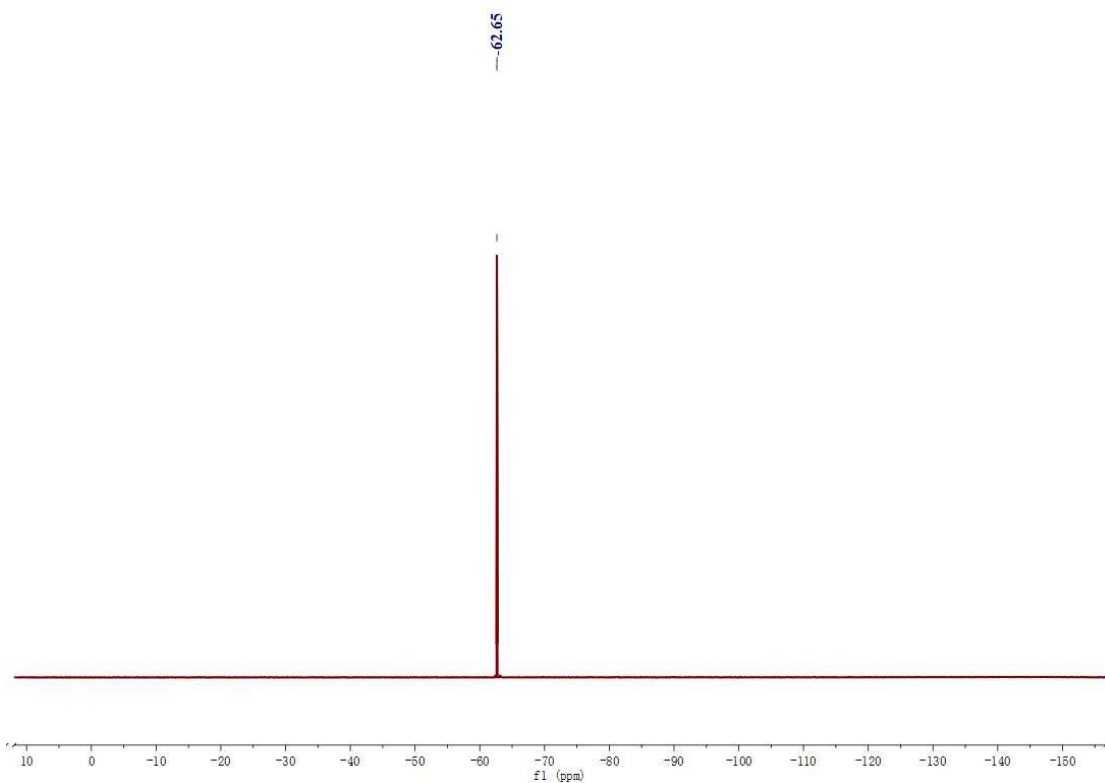

21 #51 RT: 0.55 AV: 1 NL: 1.63E+008  
T: FTMS + p ESI Full ms [120.0000-1800.0000]

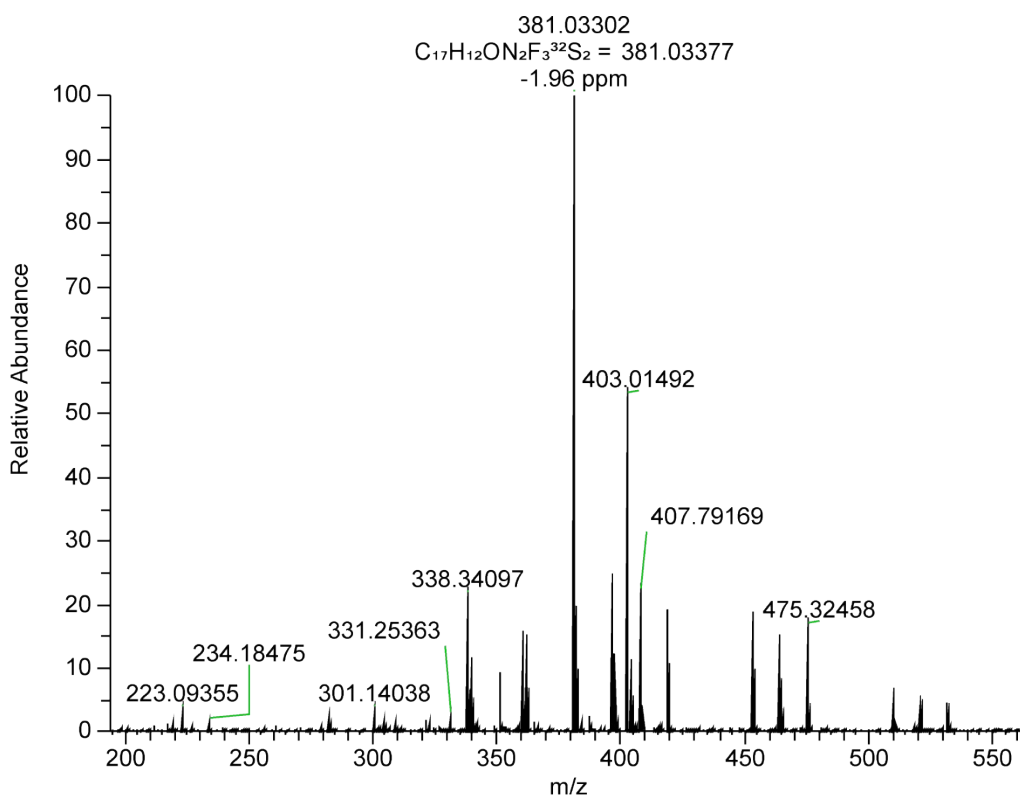

Figure S17.  $^1\text{H}$  NMR,  $^{13}\text{C}$  NMR,  $^{19}\text{F}$  NMR and HRMS for E17.

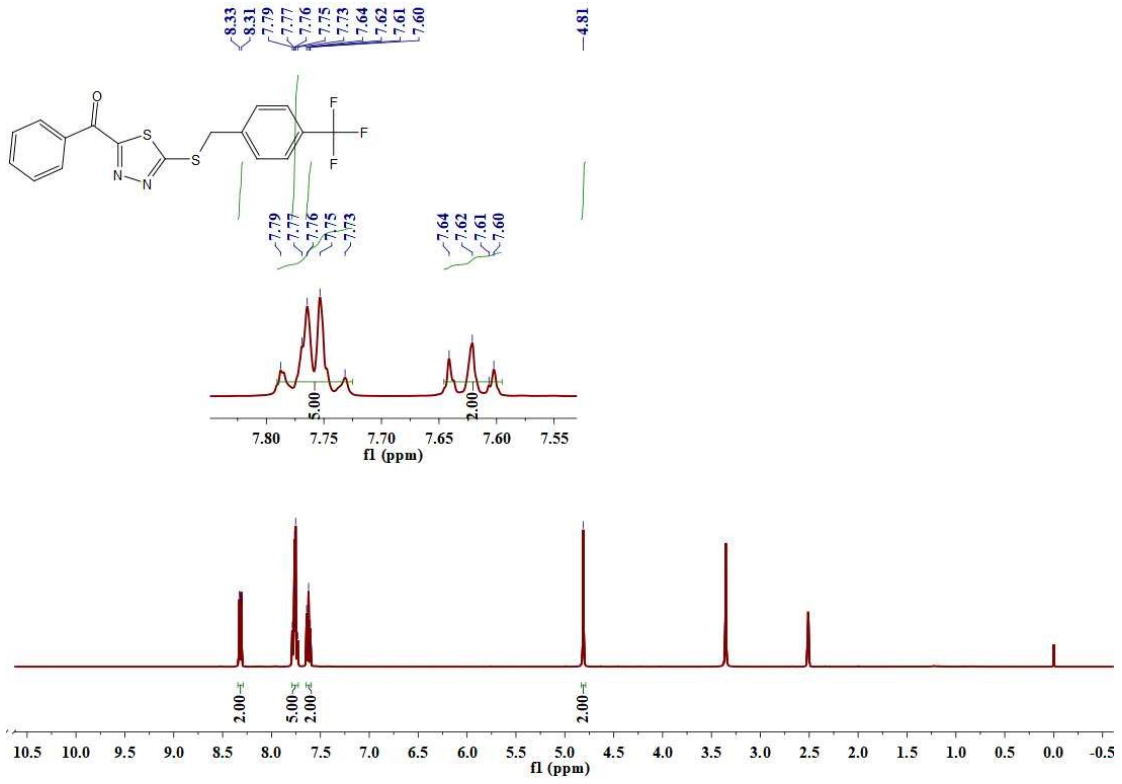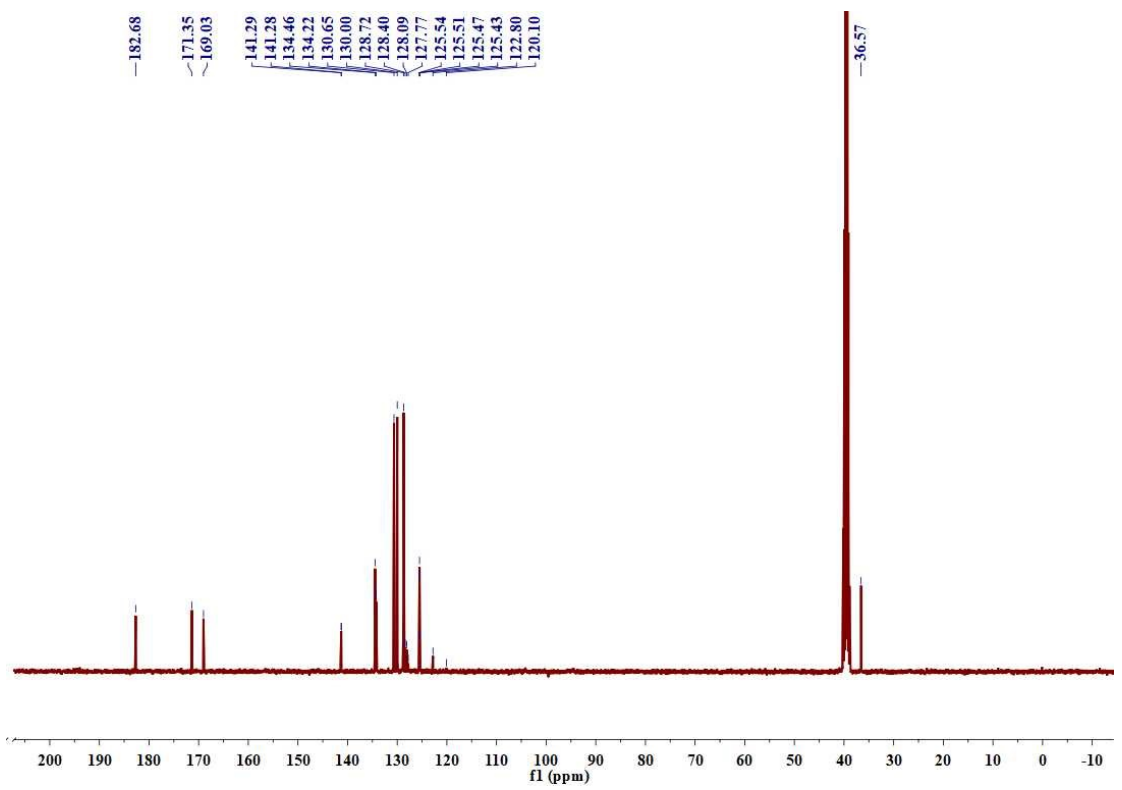

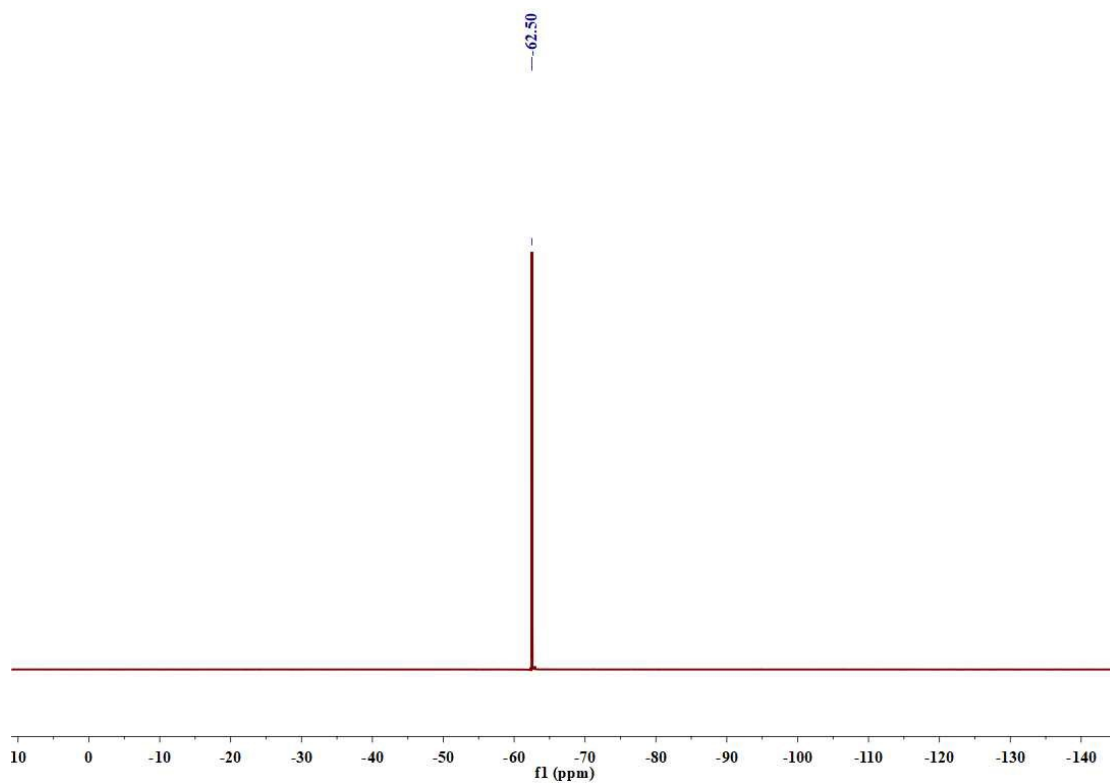

22 #55 RT: 0.57 AV: 1 NL: 1.30E+008  
T: FTMS + p ESI Full ms [120.0000-1800.0000]

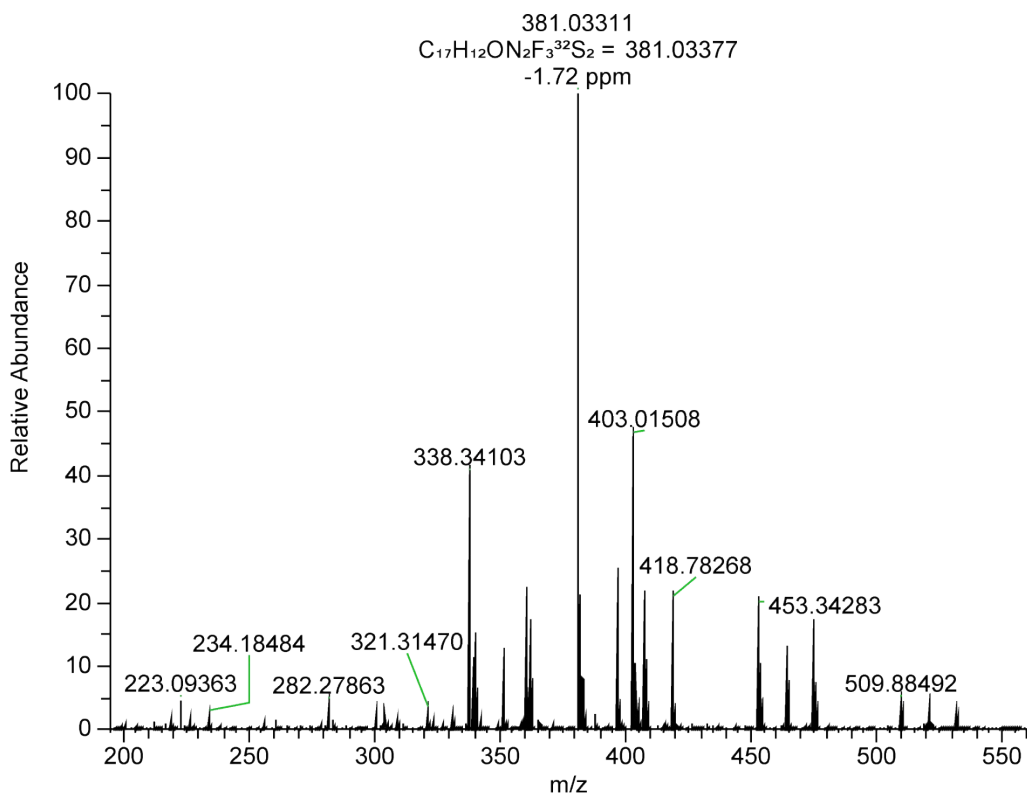

Figure S18.  $^1H$  NMR,  $^{13}C$  NMR,  $^{19}F$  NMR and HRMS for E18.

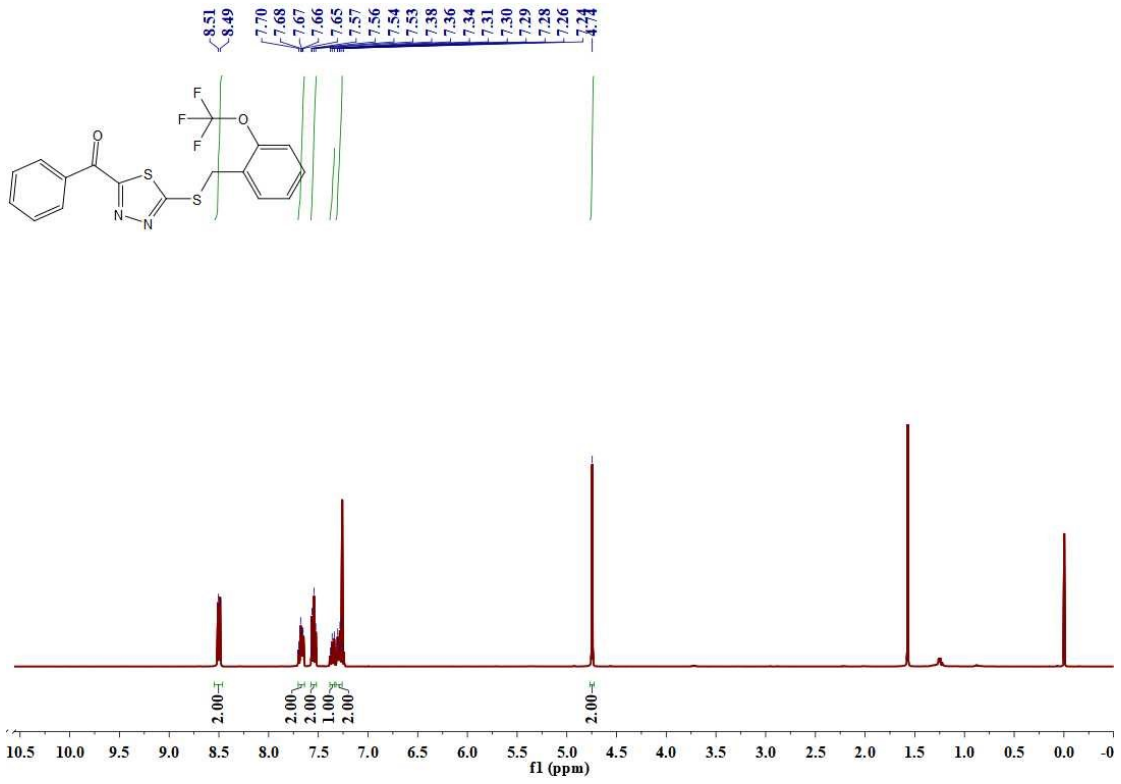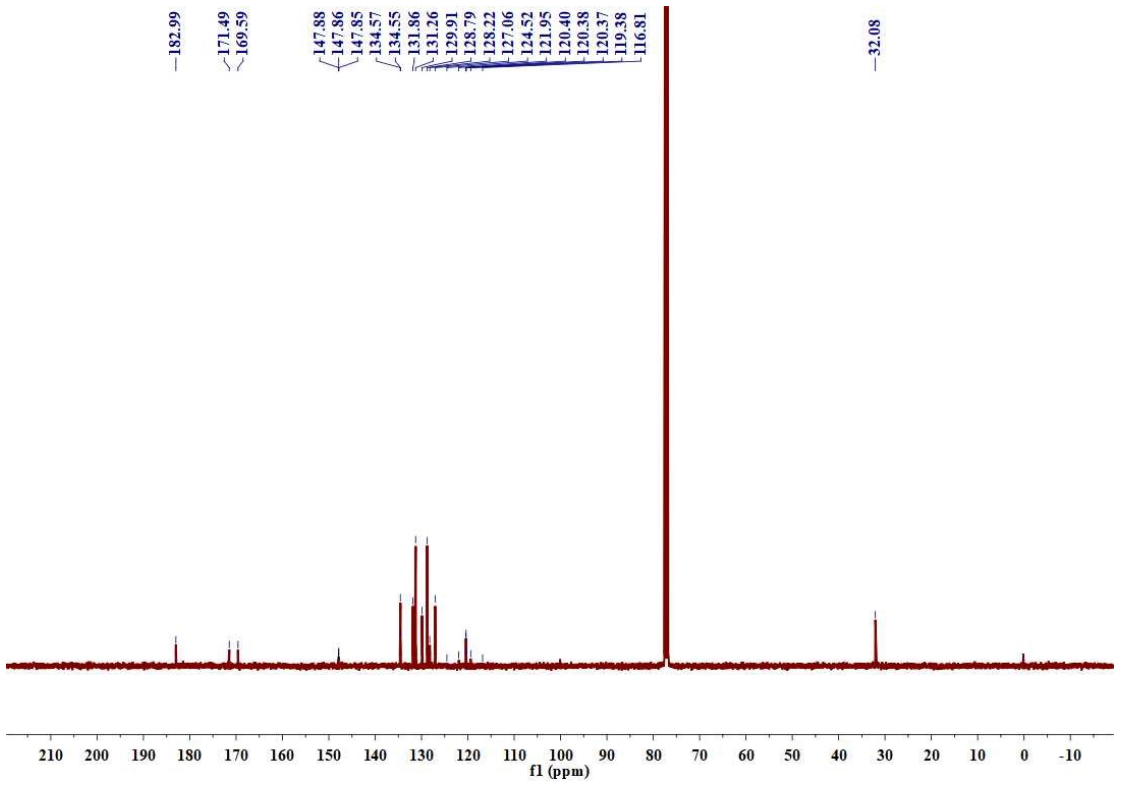

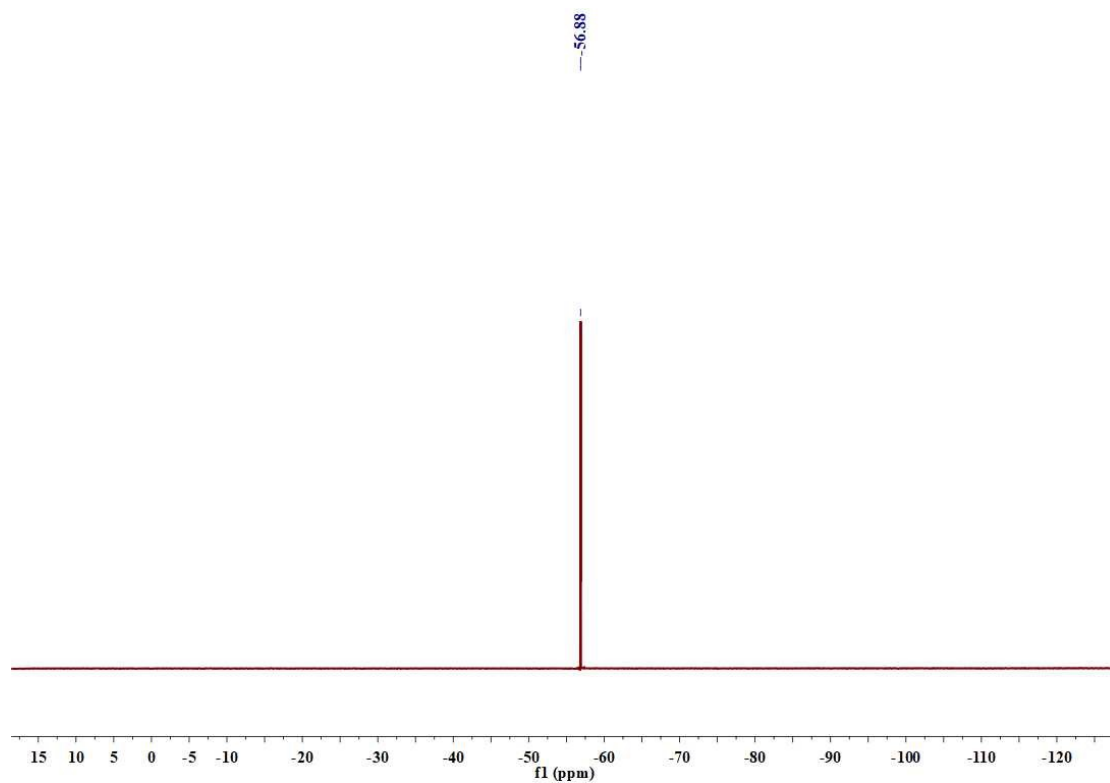

36 #63 RT: 0.62 AV: 1 NL: 2.40E+008  
T: FTMS + p ESI Full ms [120.0000-1800.0000]

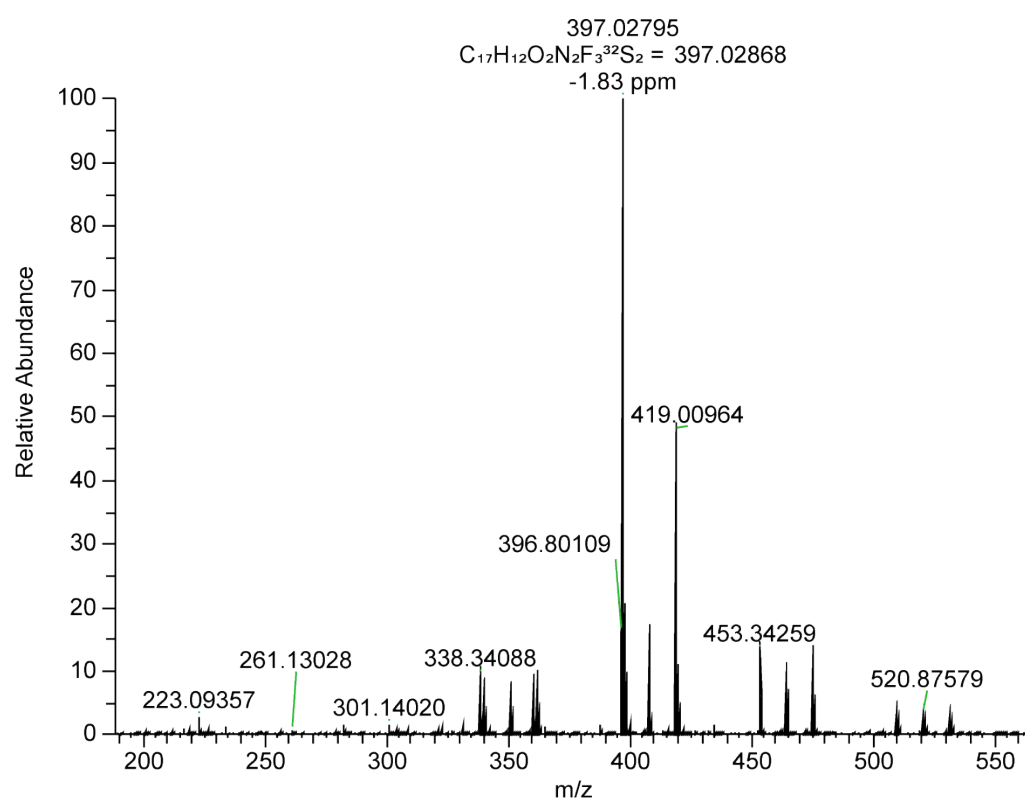

**Figure S19.**  $^1\text{H}$  NMR,  $^{13}\text{C}$  NMR,  $^{19}\text{F}$  NMR and HRMS for **E19**.

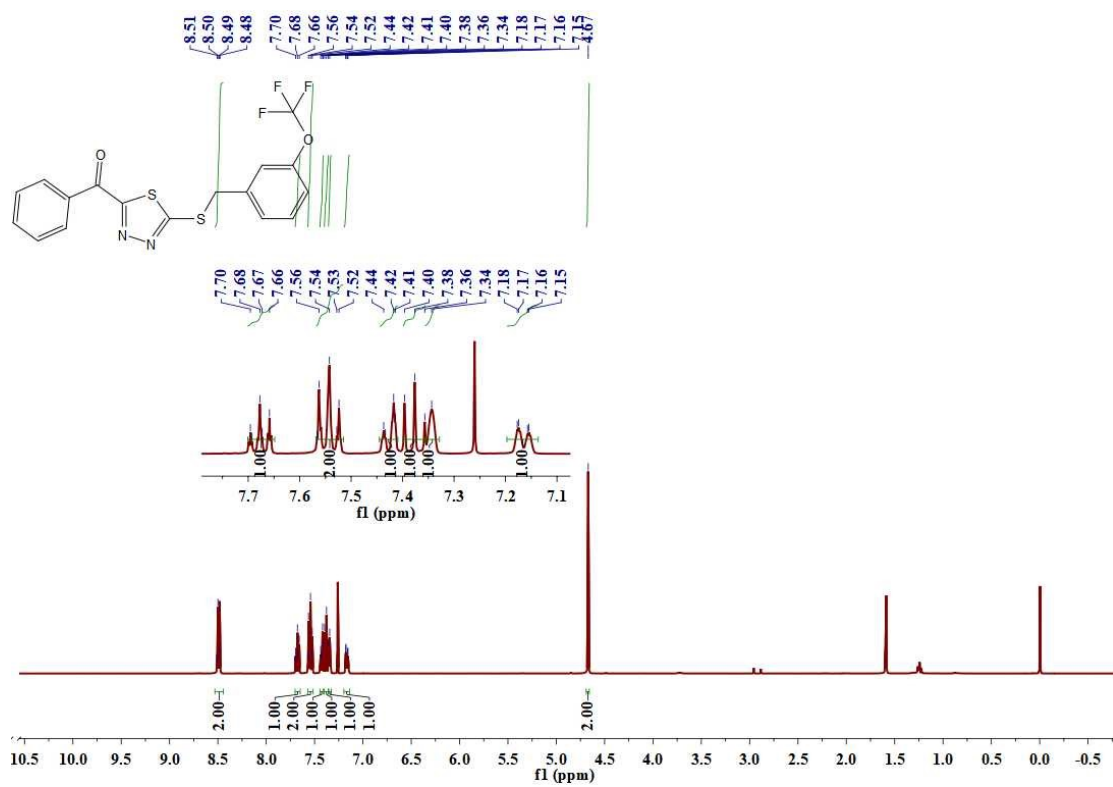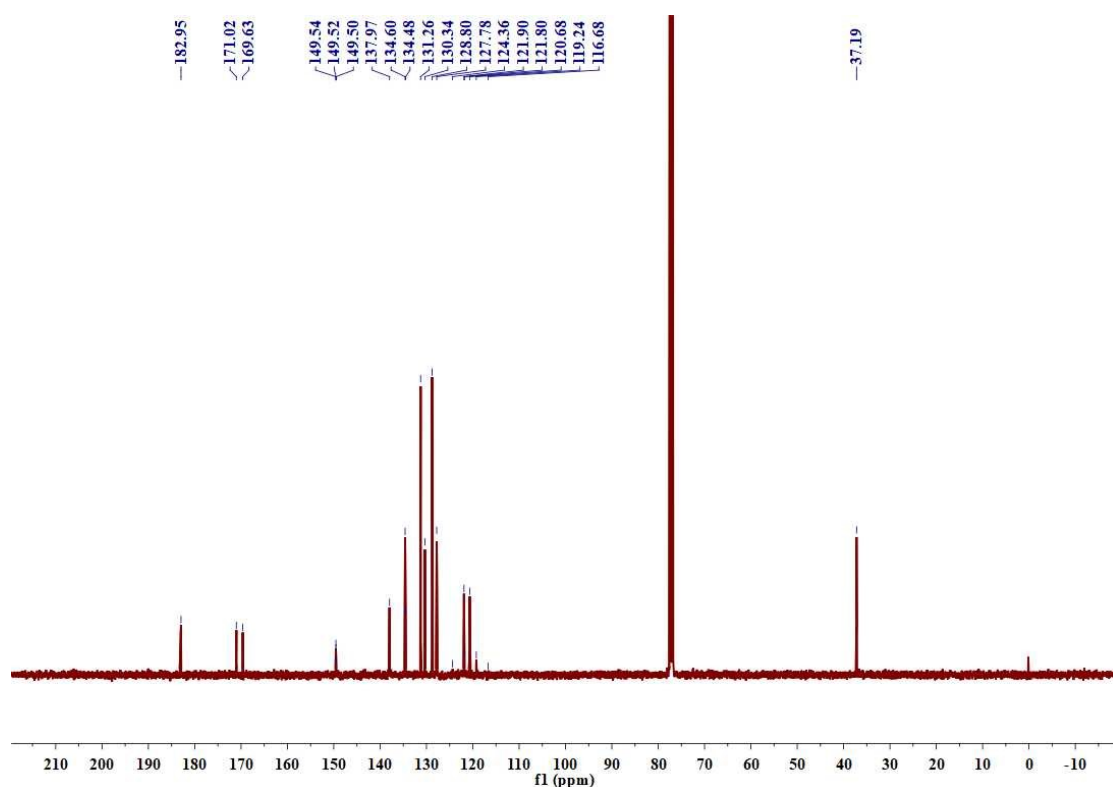



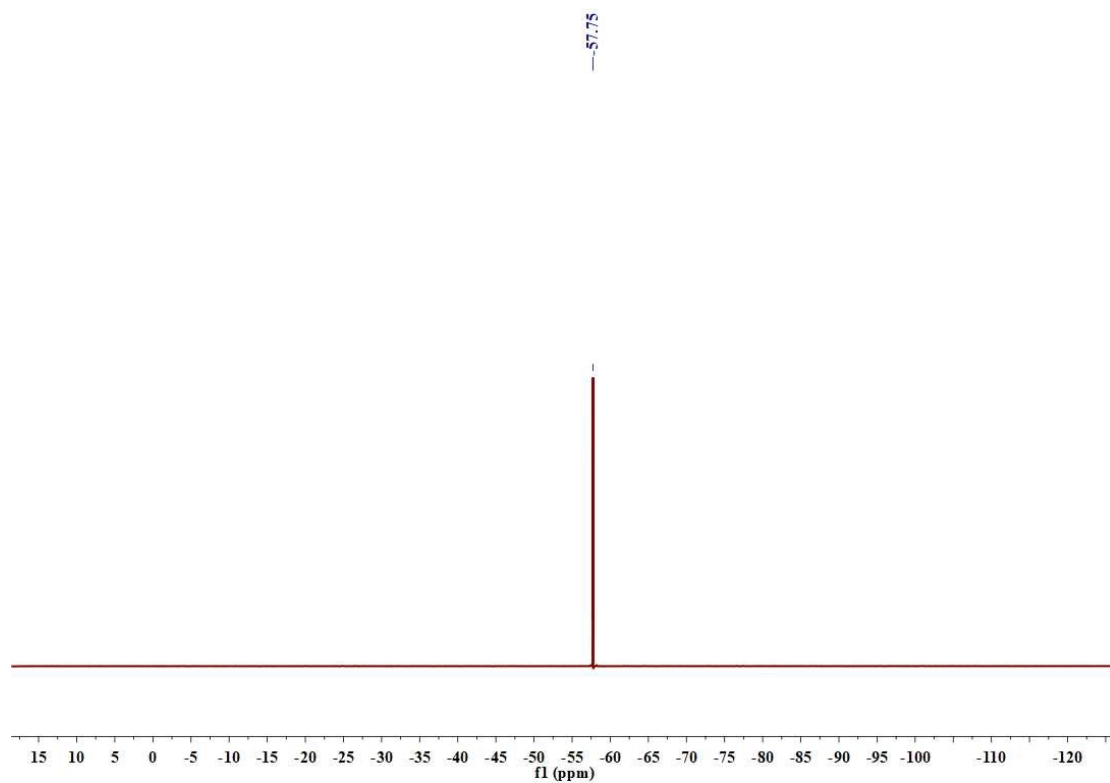

37 #61 RT: 0.60 AV: 1 NL: 2.02E+008  
T: FTMS + p ESI Full ms [120.0000-1800.0000]

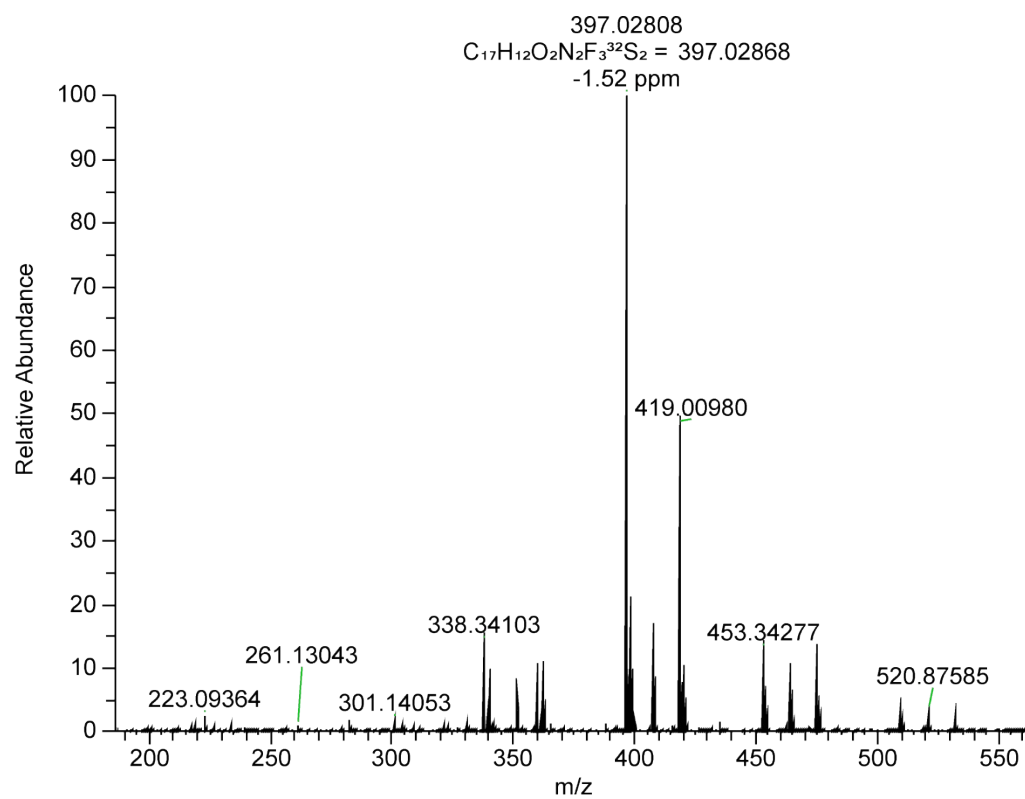

Figure S20.  $^1\text{H}$  NMR,  $^{13}\text{C}$  NMR,  $^{19}\text{F}$  NMR and HRMS for E20.

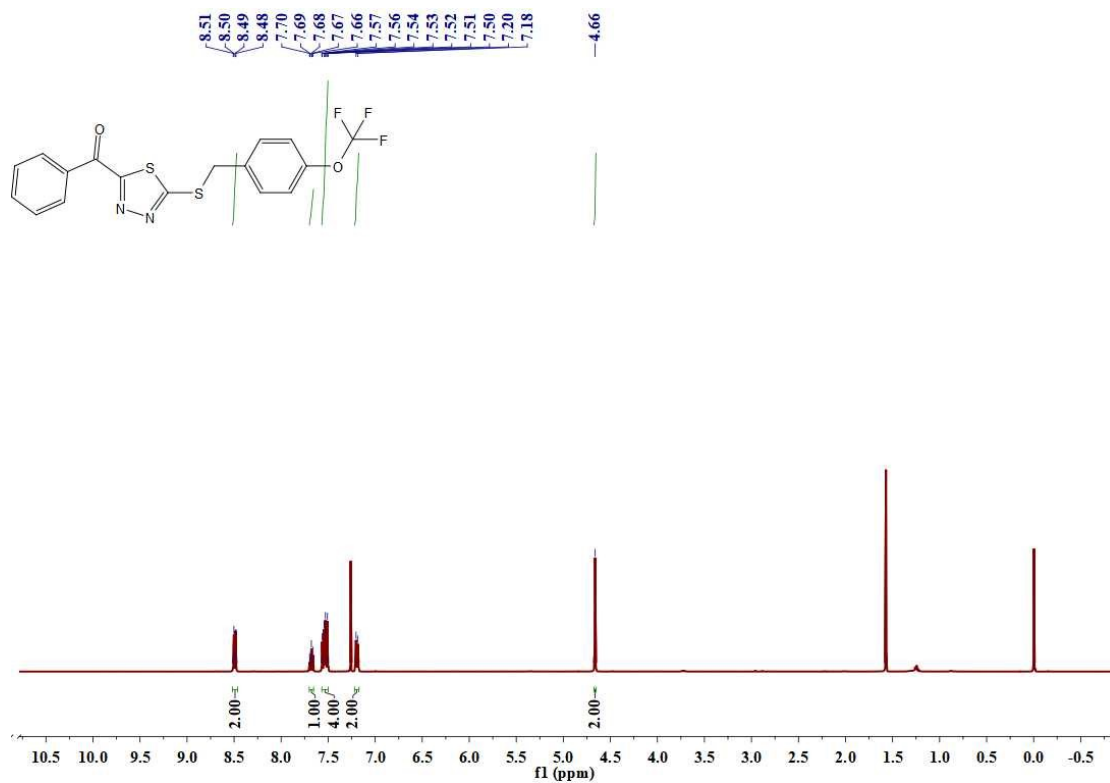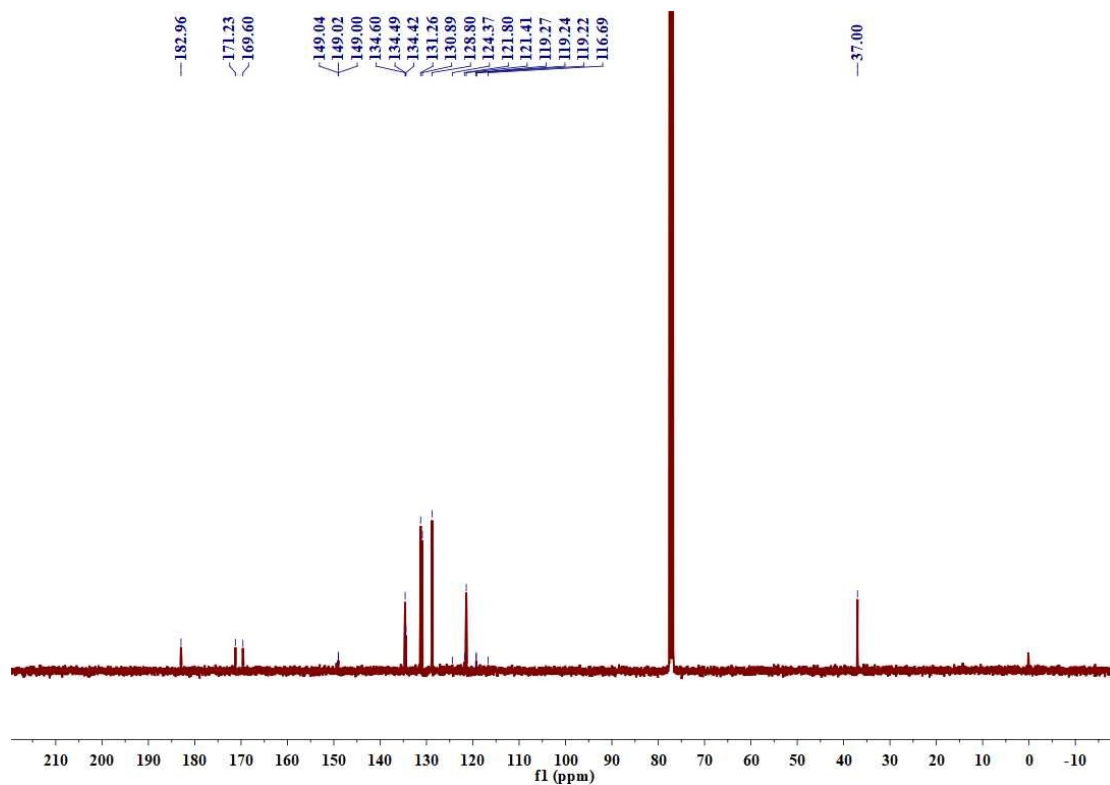

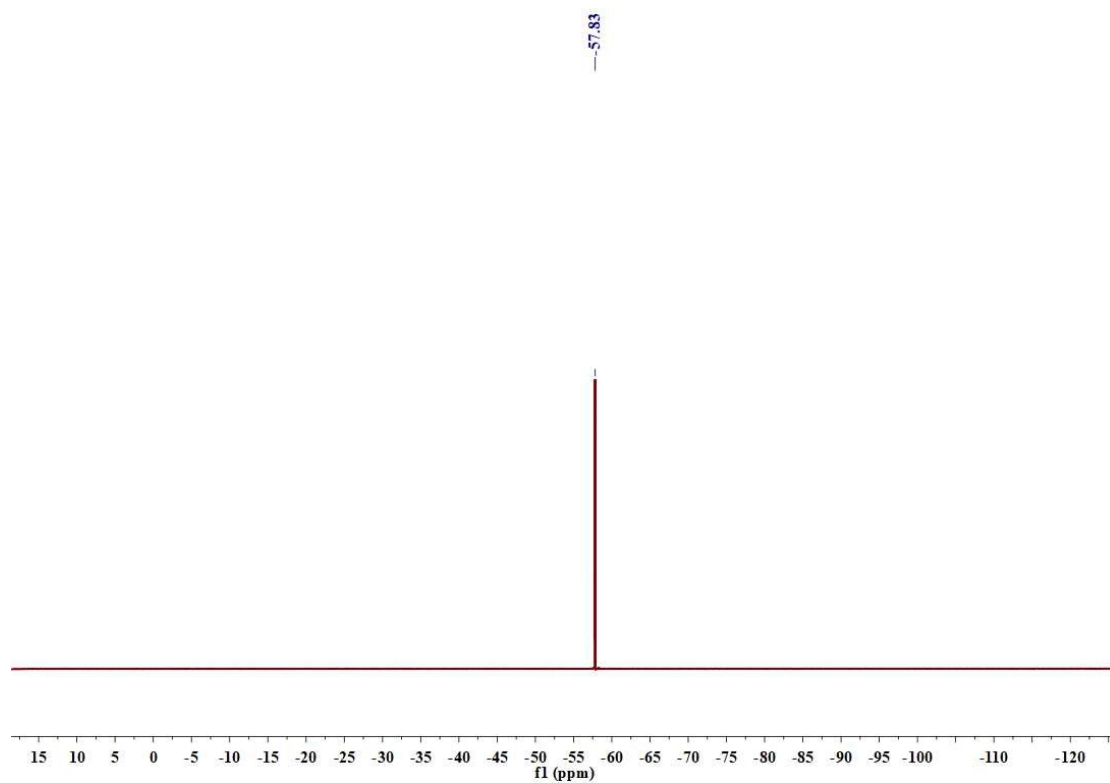

38 #63 RT: 0.62 AV: 1 NL: 7.31E+007  
T: FTMS + p ESI Full ms [120.0000-1800.0000]

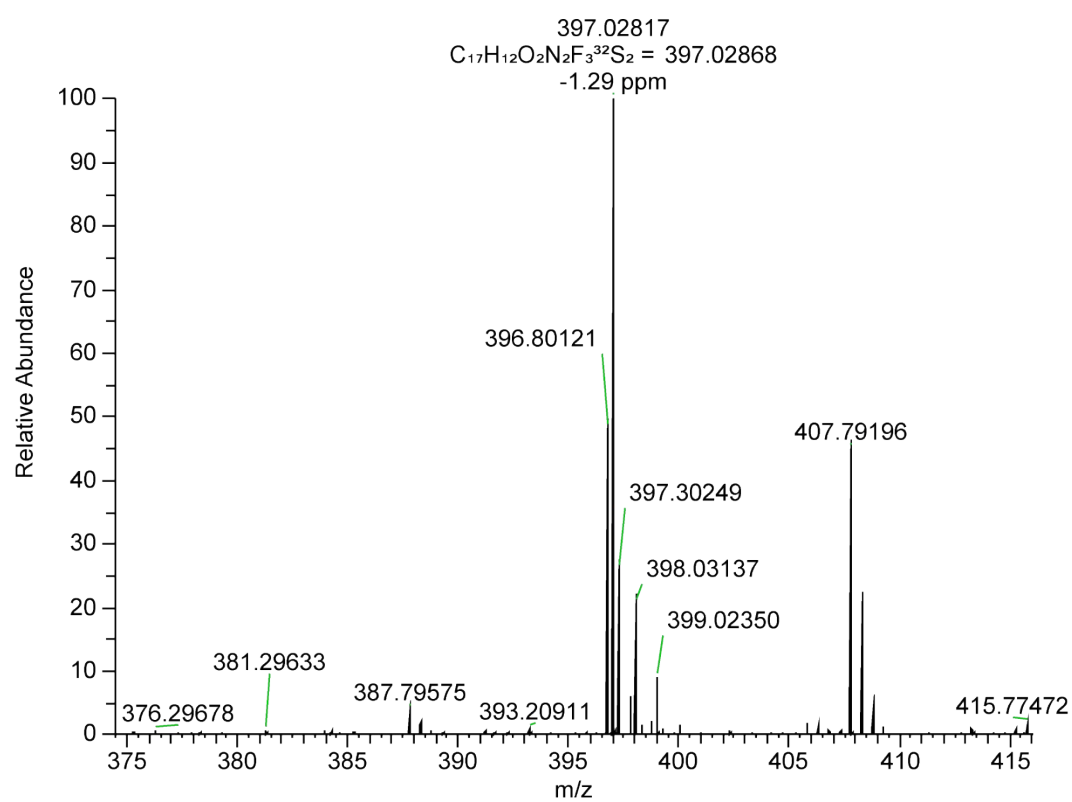

Figure S21.  $^1H$  NMR,  $^{13}C$  NMR,  $^{19}F$  NMR and HRMS for E21.

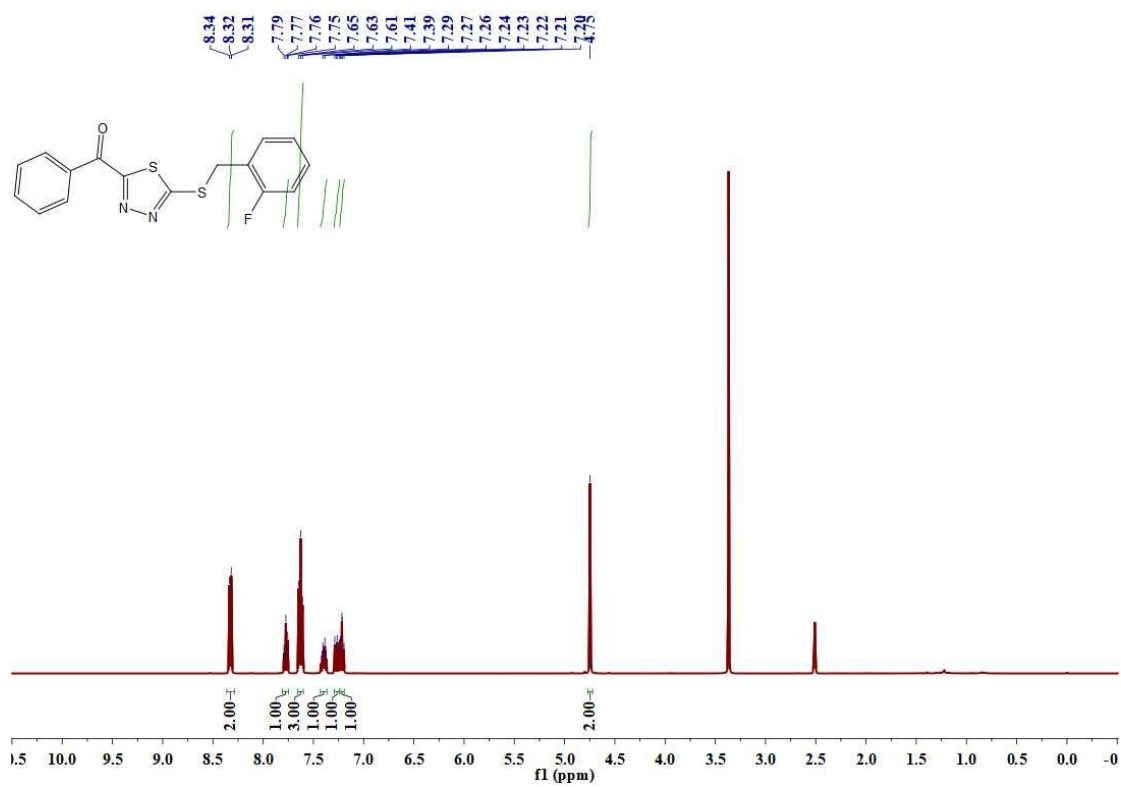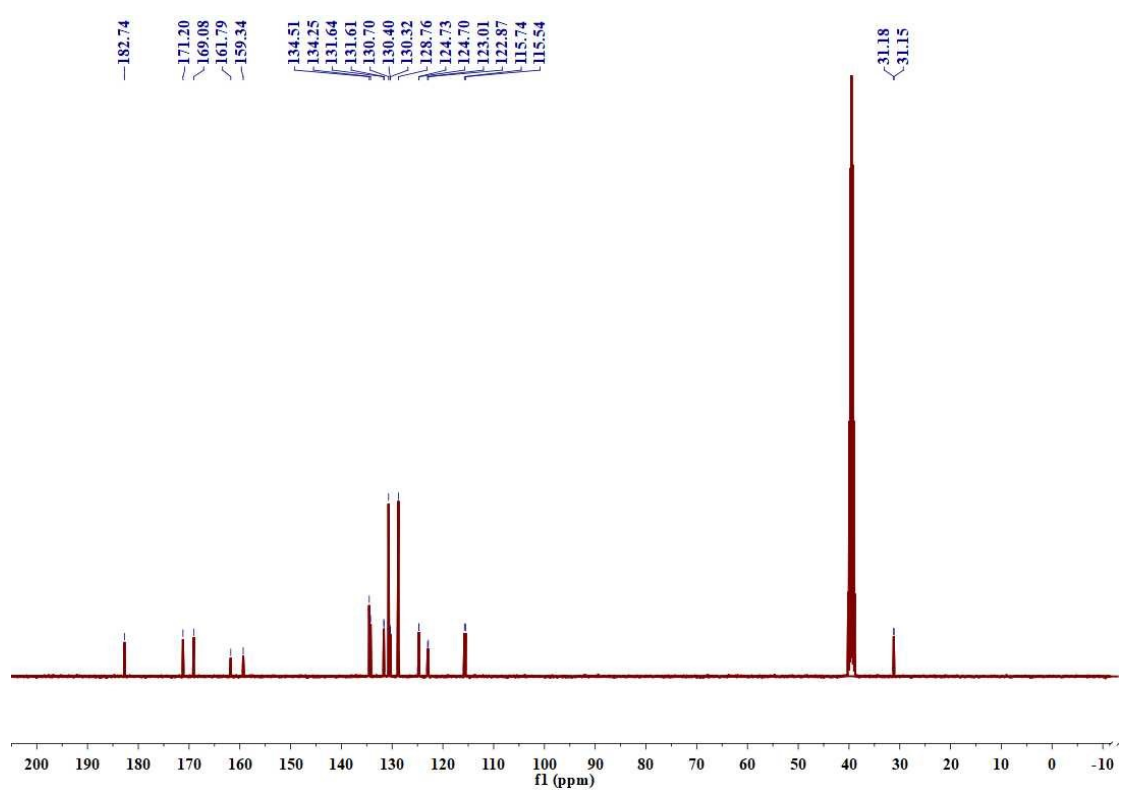

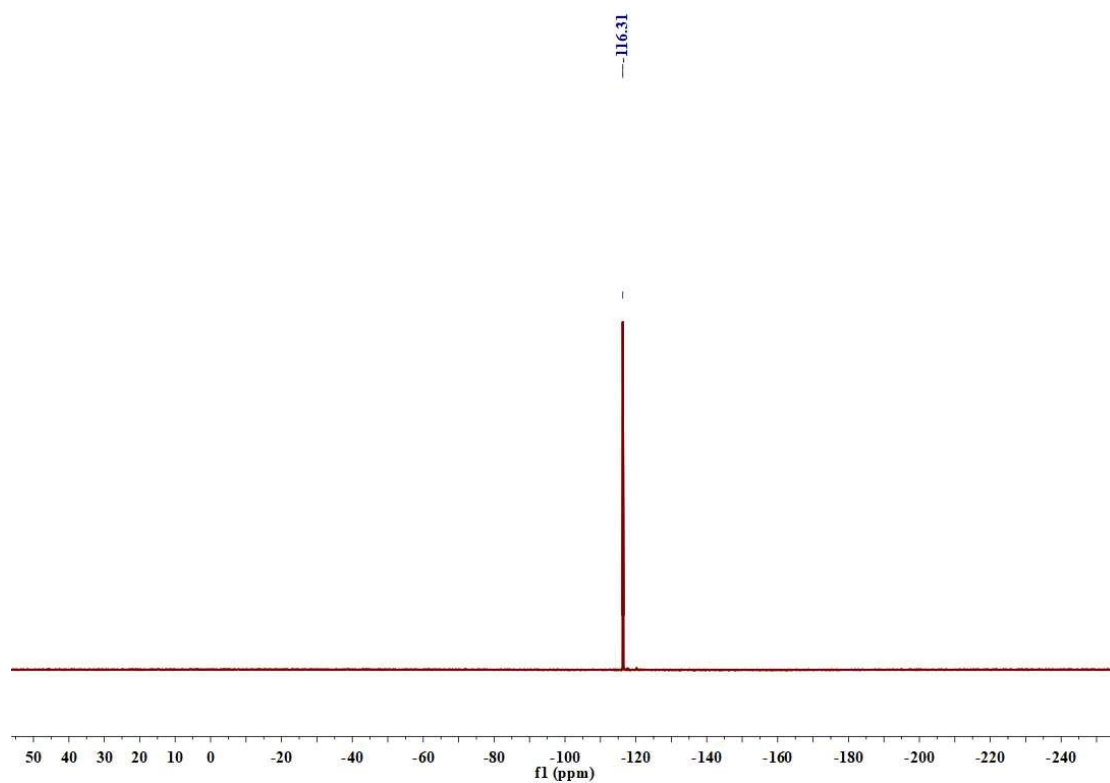

30 #61 RT: 0.61 AV: 1 NL: 1.33E+008  
T: FTMS + p ESI Full ms [120.0000-1800.0000]

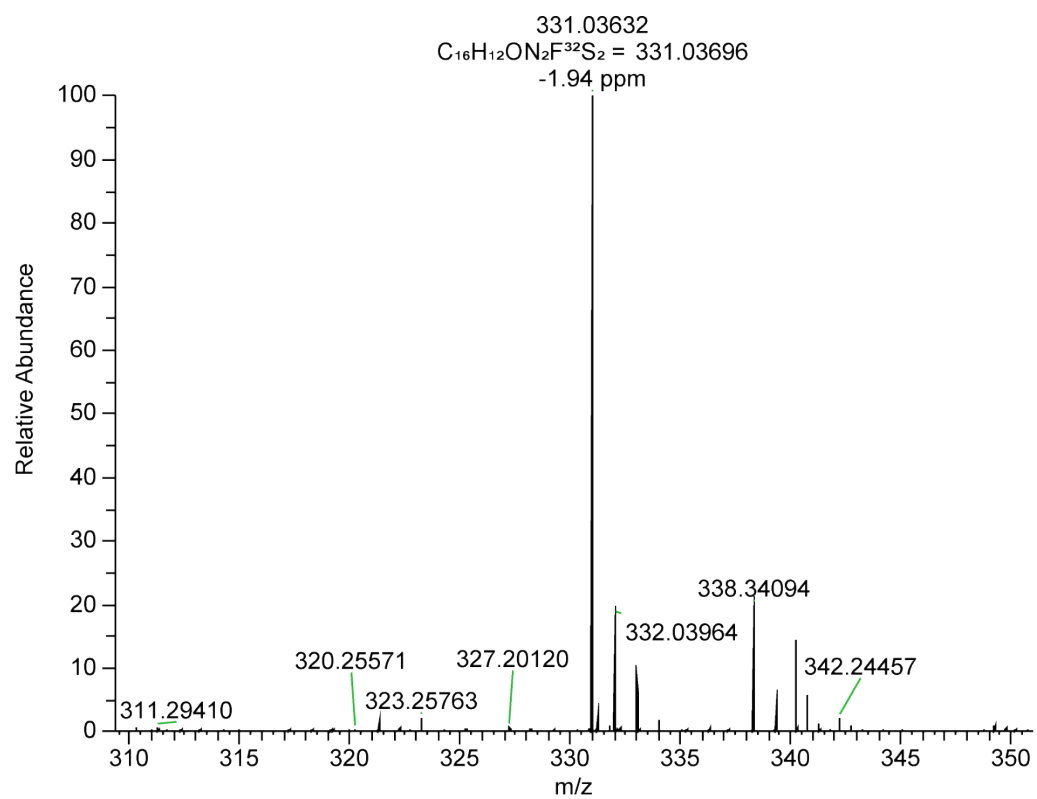

**Figure S22.**  $^1\text{H}$  NMR,  $^{13}\text{C}$  NMR,  $^{19}\text{F}$  NMR and HRMS for **E22**.

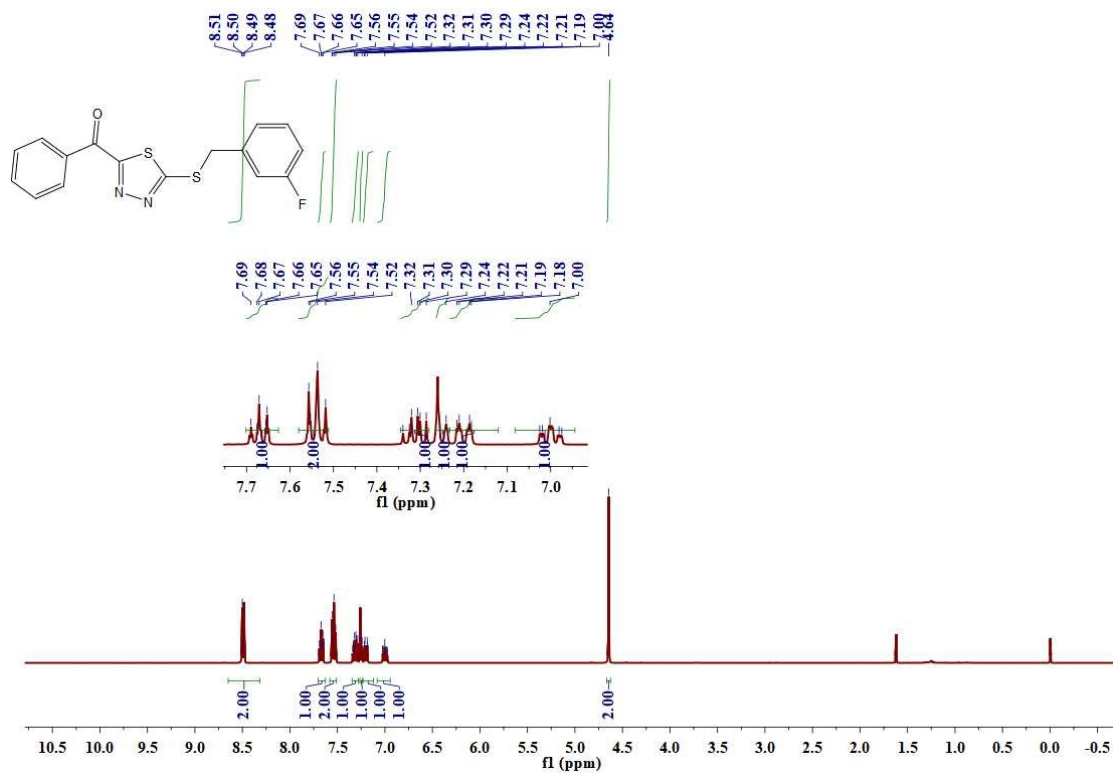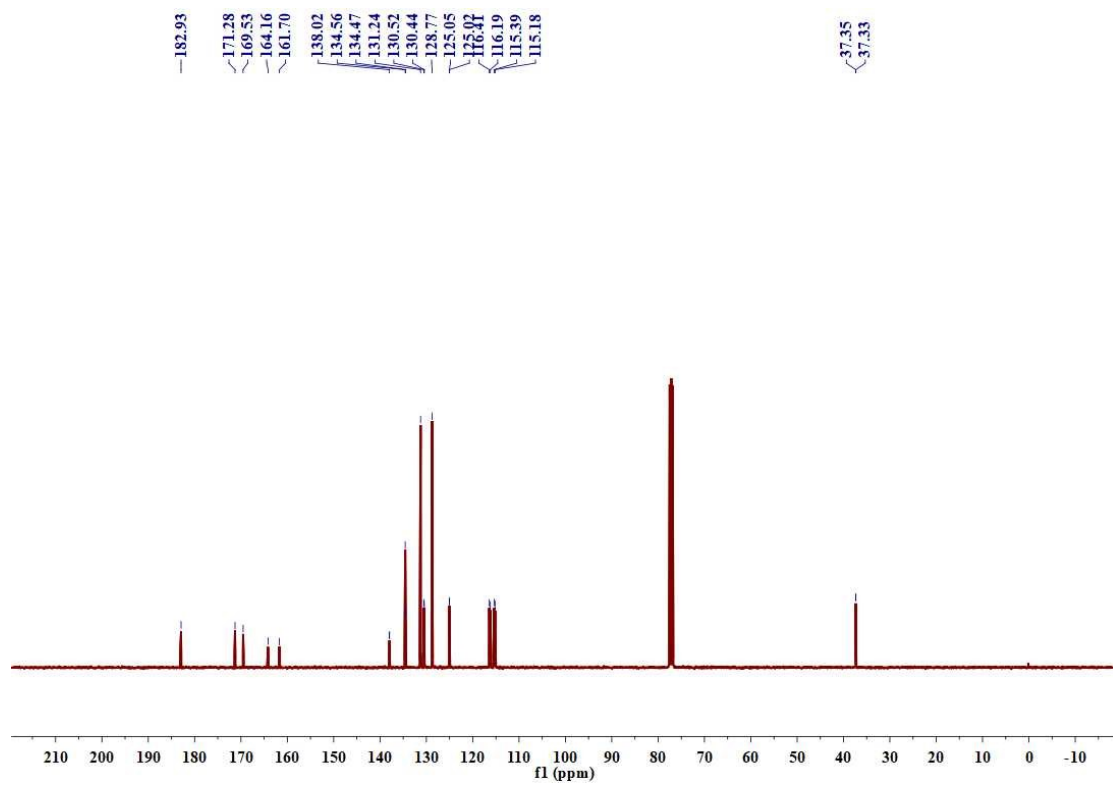

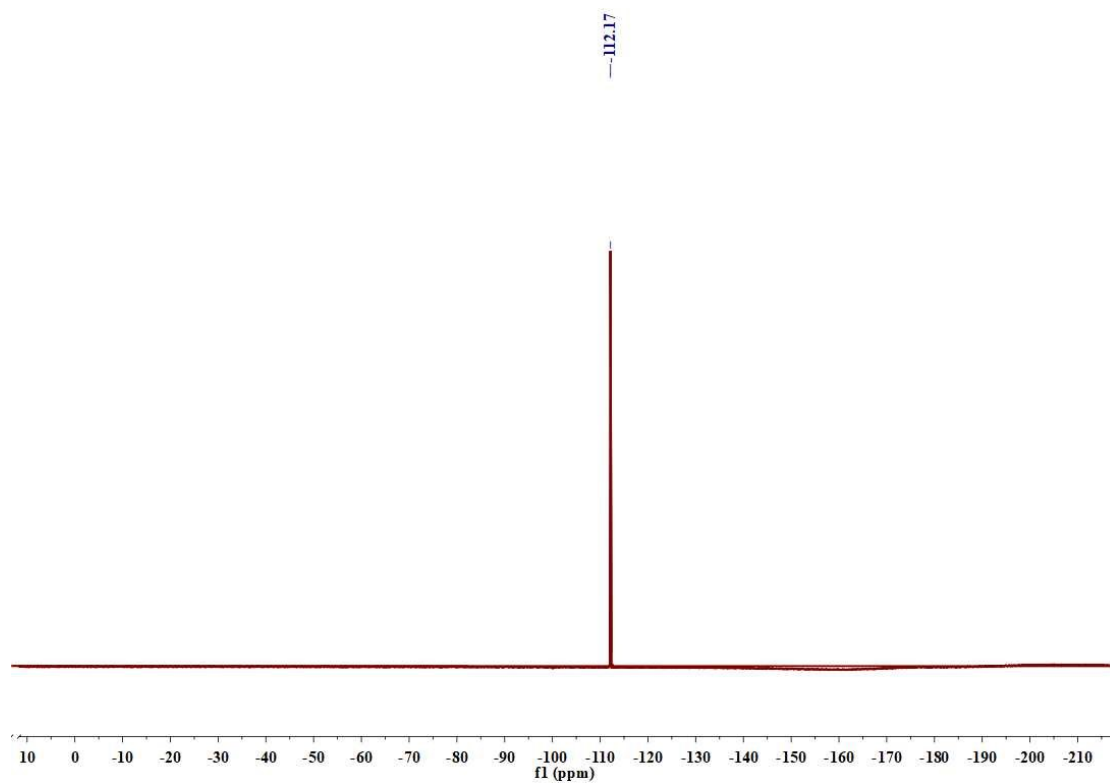

31 #63 RT: 0.63 AV: 1 NL: 7.14E+007  
T: FTMS + p ESI Full ms [120.0000-1800.0000]

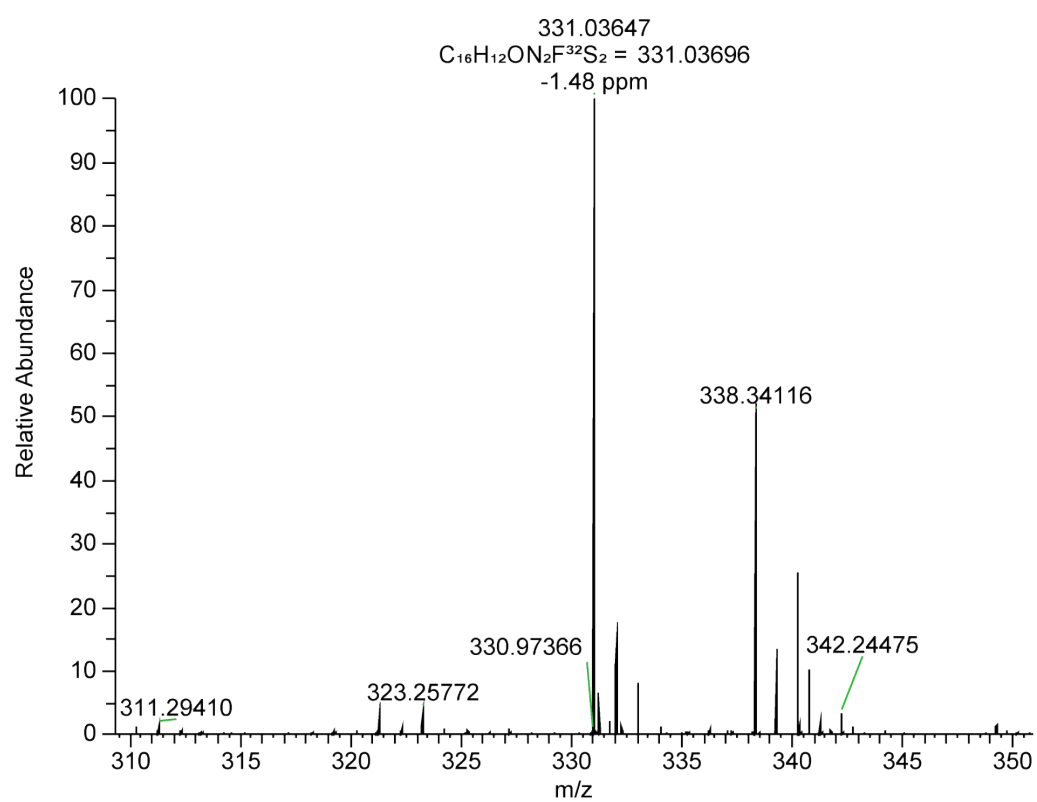

Figure S23.  $^1H$  NMR,  $^{13}C$  NMR,  $^{19}F$  NMR and HRMS for E23.

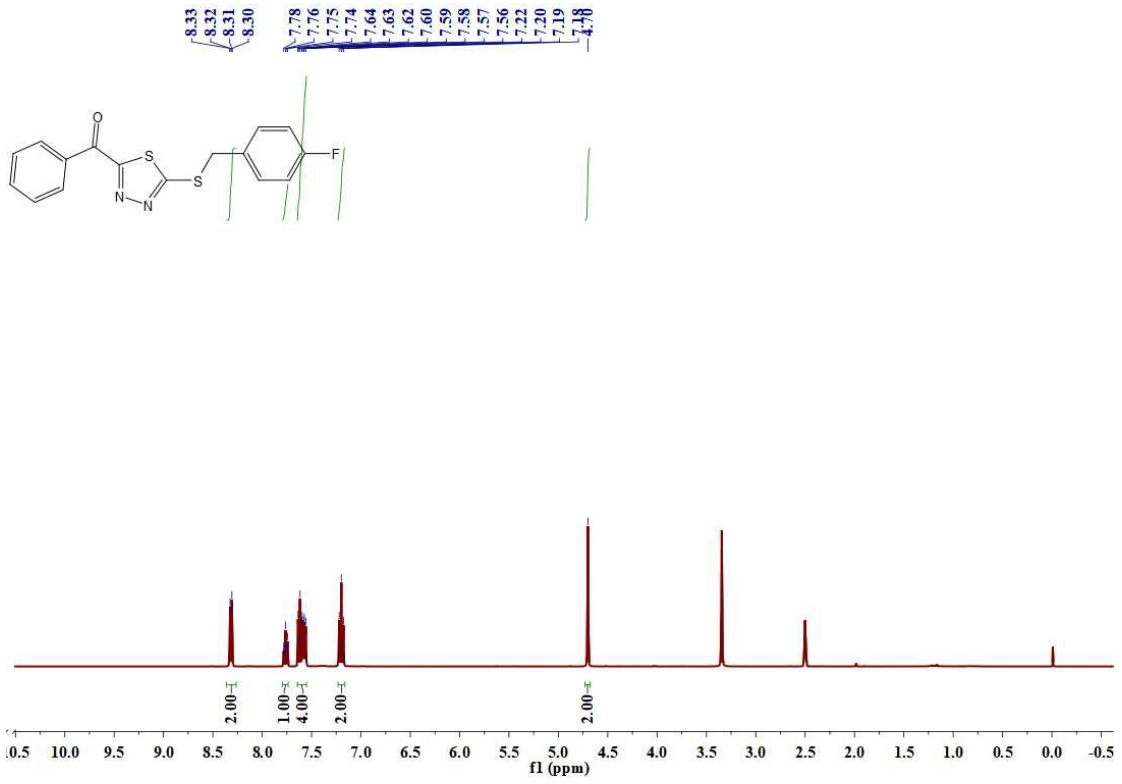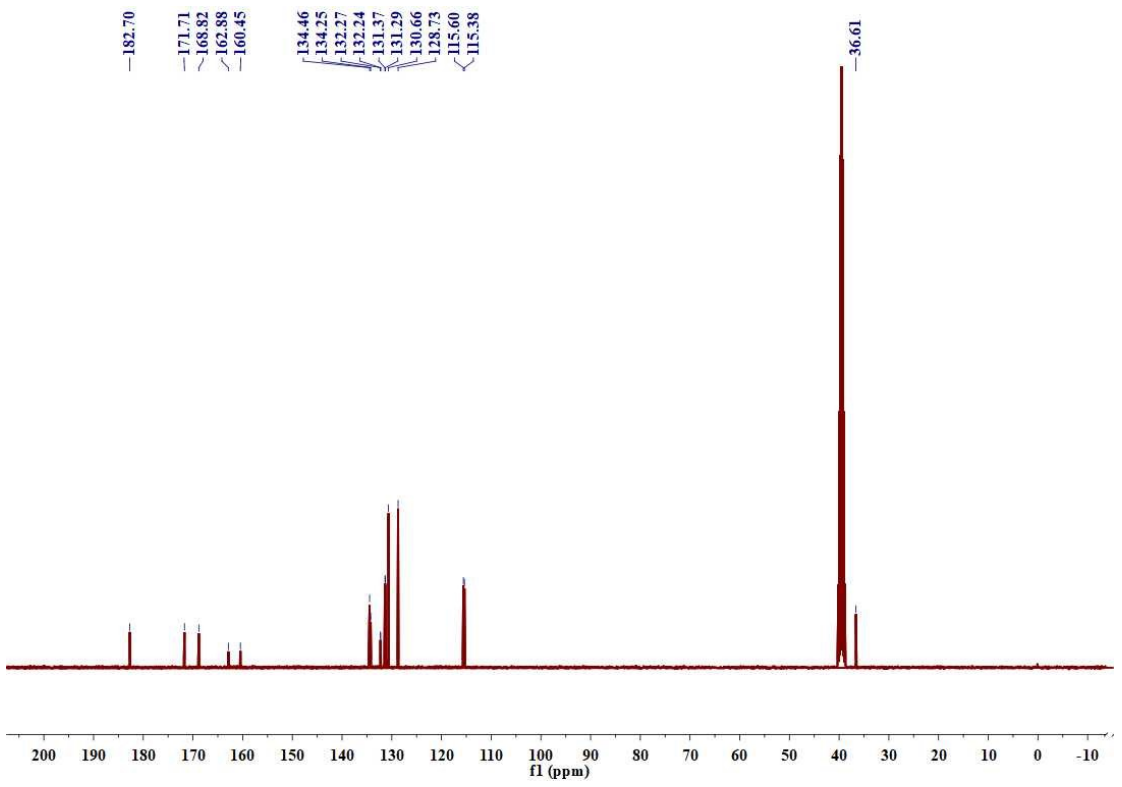



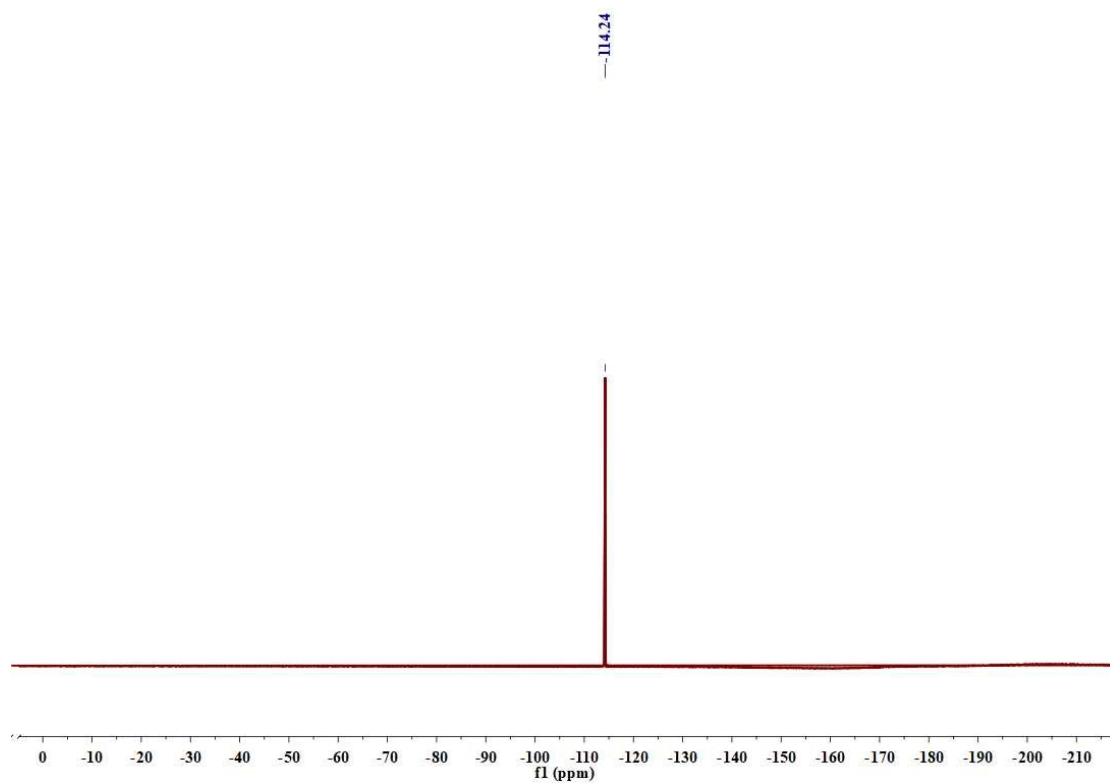

32 #55 RT: 0.55 AV: 1 NL: 5.64E+007  
T: FTMS + p ESI Full ms [120.0000-1800.0000]

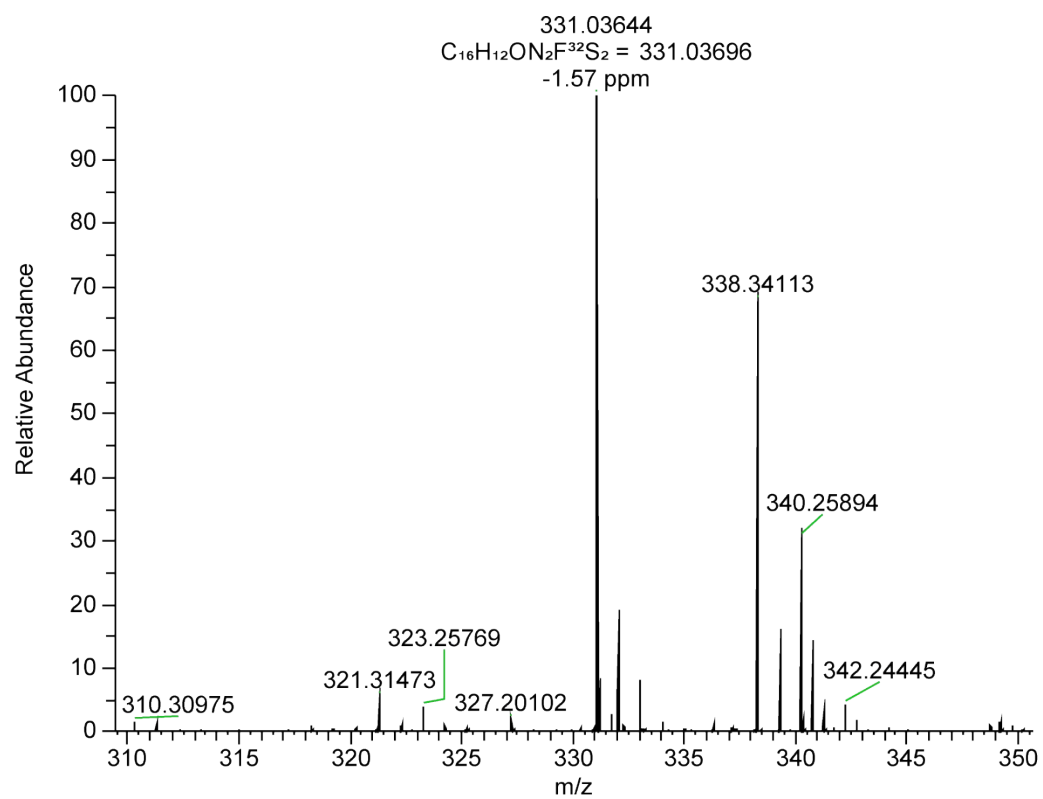

Figure S24.  $^1H$  NMR,  $^{13}C$  NMR,  $^{19}F$  NMR and HRMS for E24.

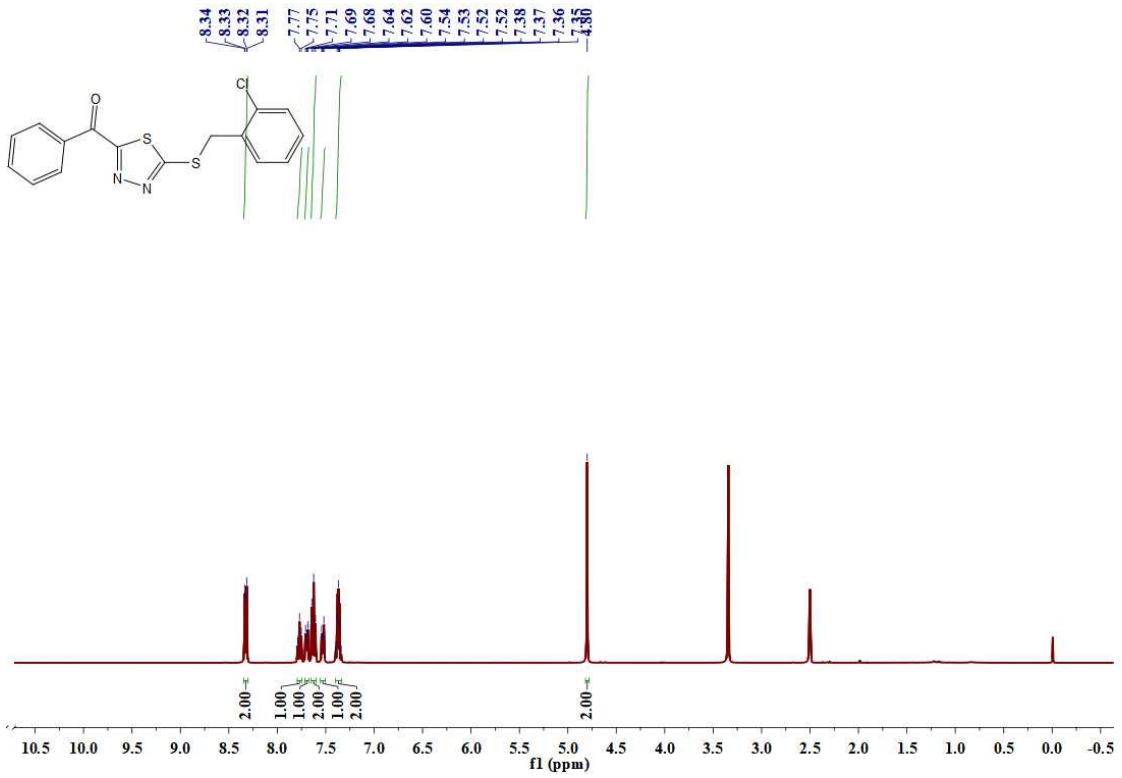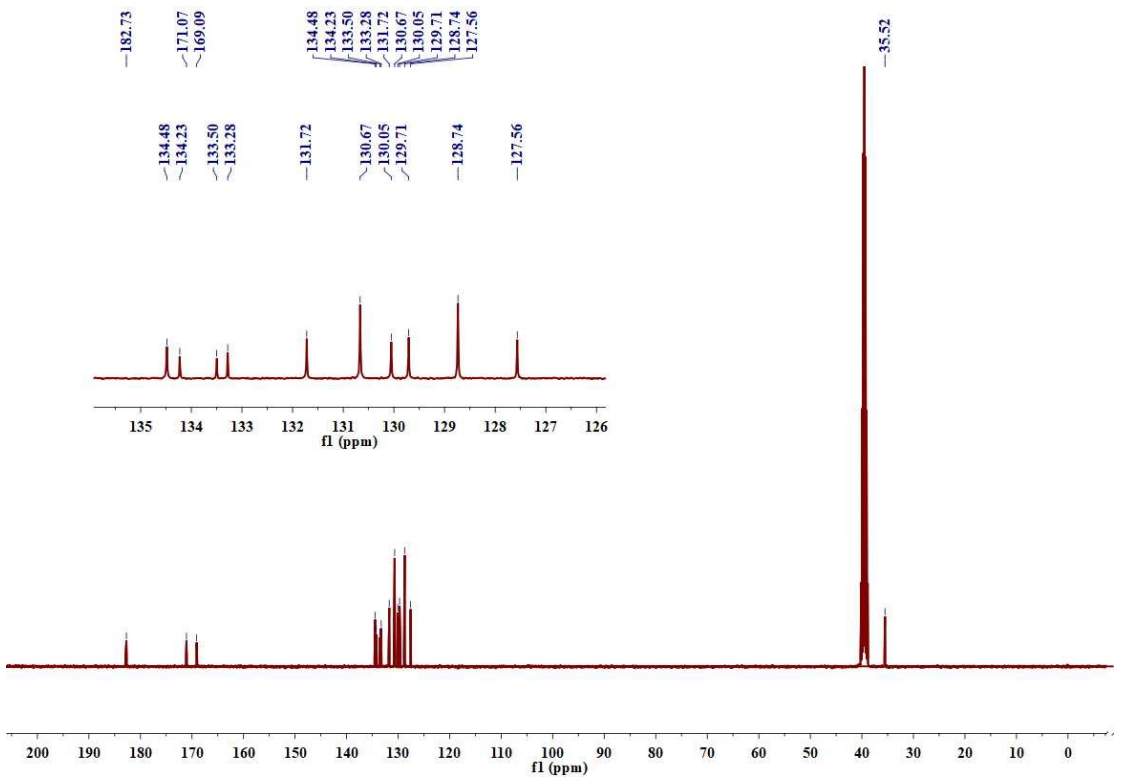

17 #67 RT: 0.77 AV: 1 NL: 4.74E+007  
T: FTMS + p ESI Full ms [120.0000-1800.0000]

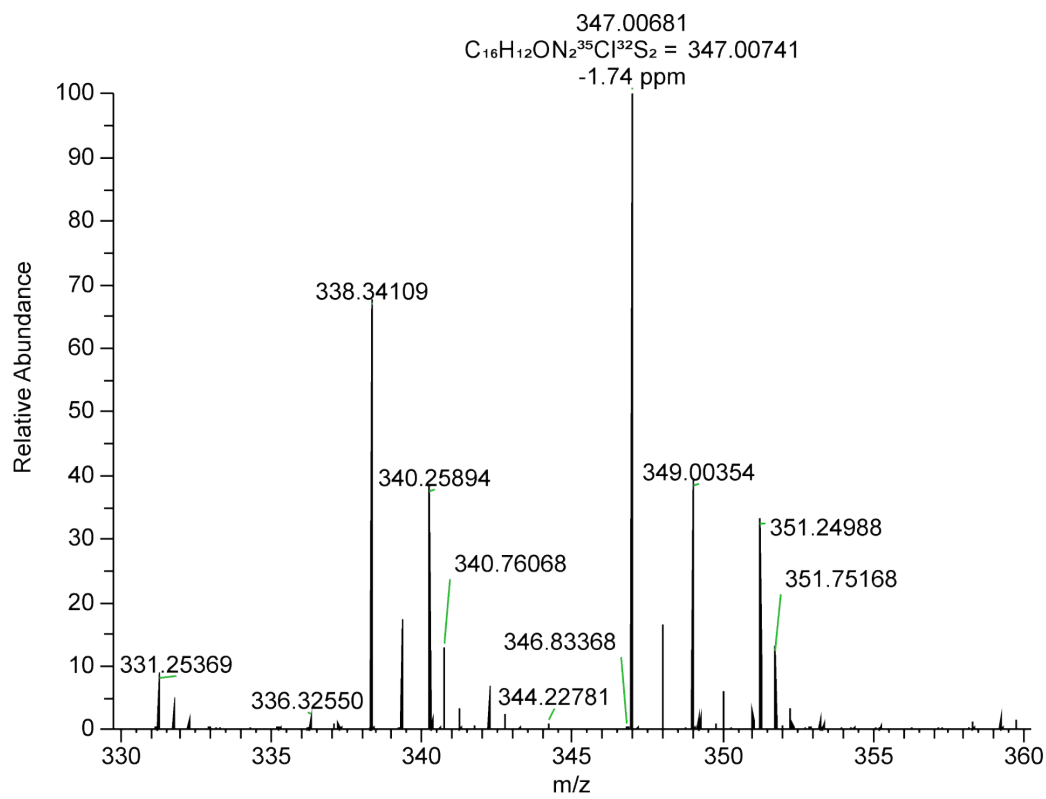

Figure S25.  $^1H$  NMR,  $^{13}C$  NMR and HRMS for E25.

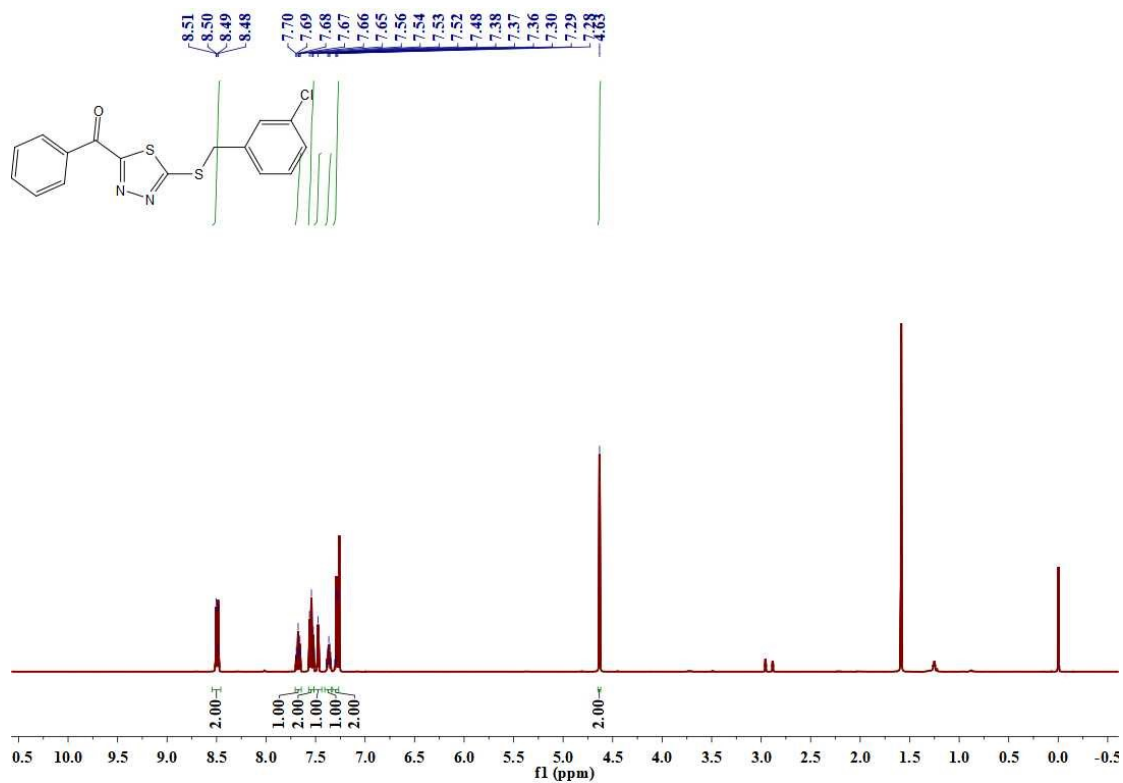

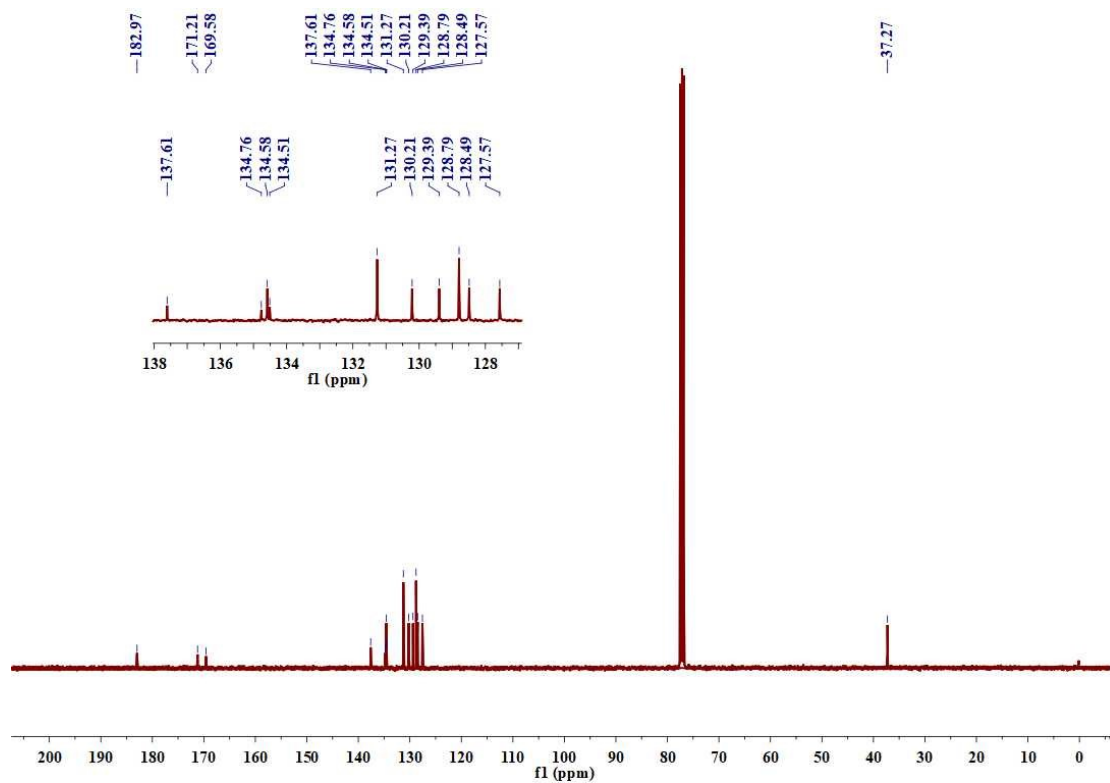

18 #55 RT: 0.63 AV: 1 NL: 4.33E+007  
 T: FTMS + p ESI Full ms [120.0000-1800.0000]

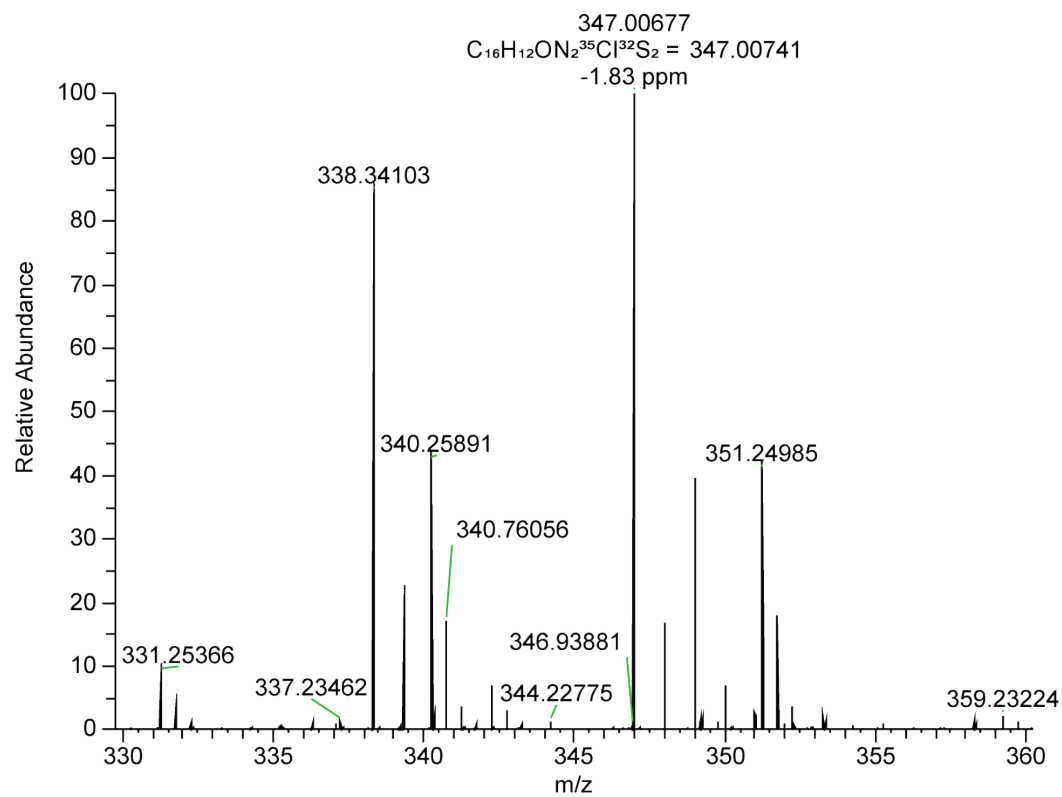

Figure S26.  $^1\text{H}$  NMR,  $^{13}\text{C}$  NMR and HRMS for E26.



19 #55 RT: 0.63 AV: 1 NL: 3.57E+007  
T: FTMS + p ESI Full ms [120.0000-1800.0000]

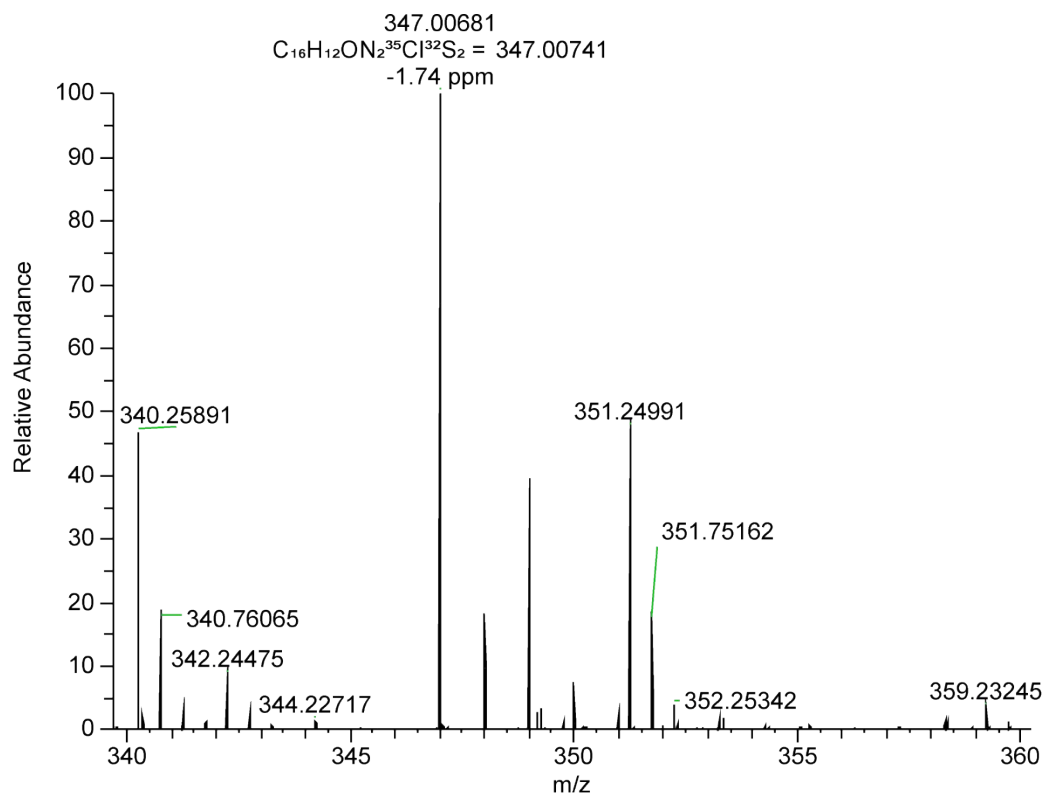

Figure S27.  $^1H$  NMR,  $^{13}C$  NMR and HRMS for E27.

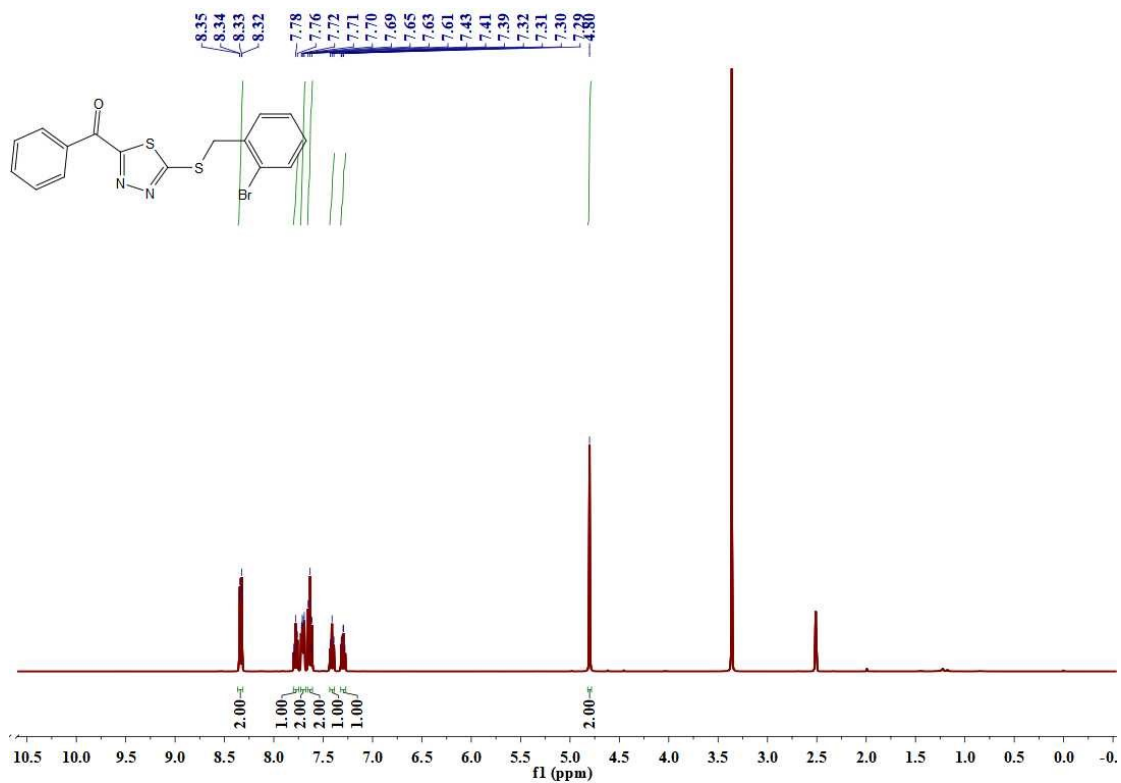

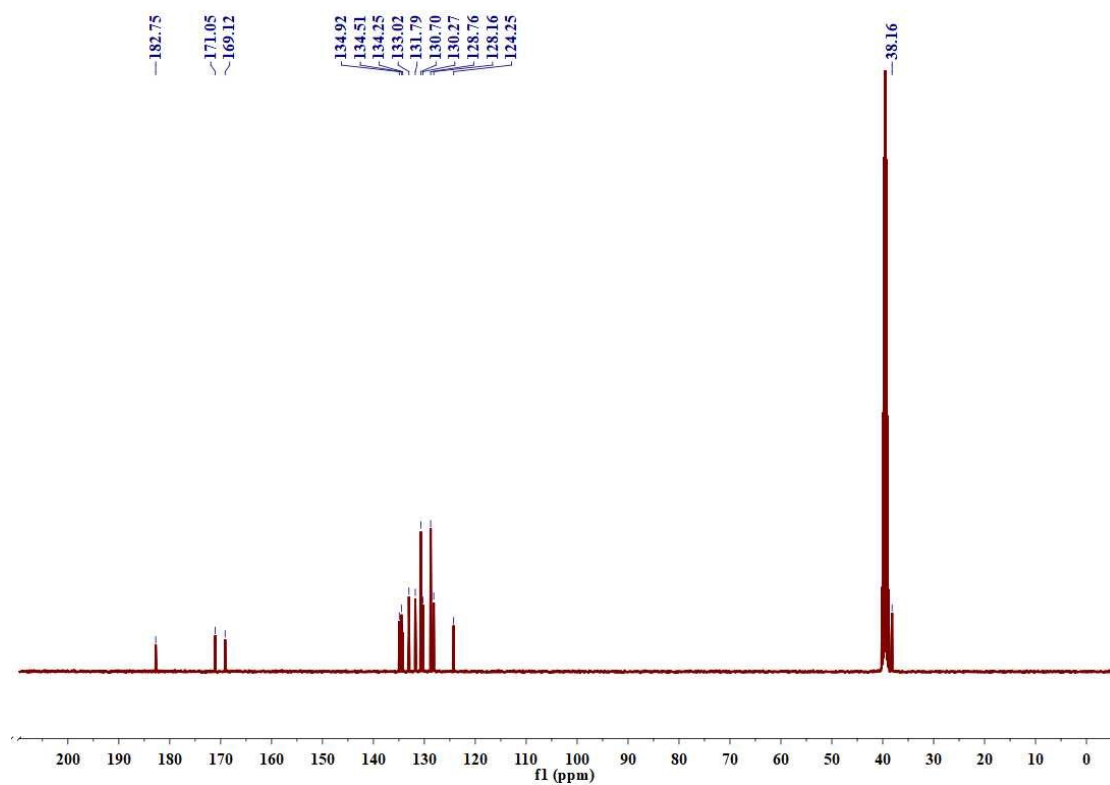

24 #77 RT: 0.80 AV: 1 NL: 2.69E+007  
 T: FTMS + p ESI Full ms [120.0000-1800.0000]

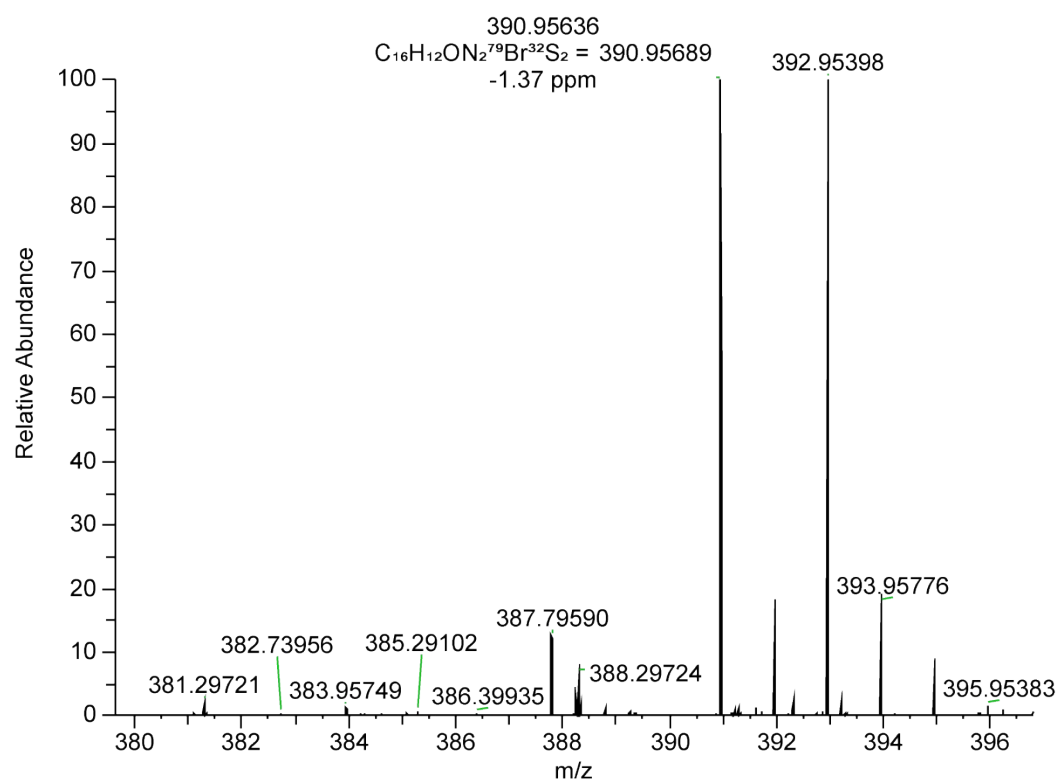

**Figure S28.**  $^1H$  NMR,  $^{13}C$  NMR and HRMS for **E28**.

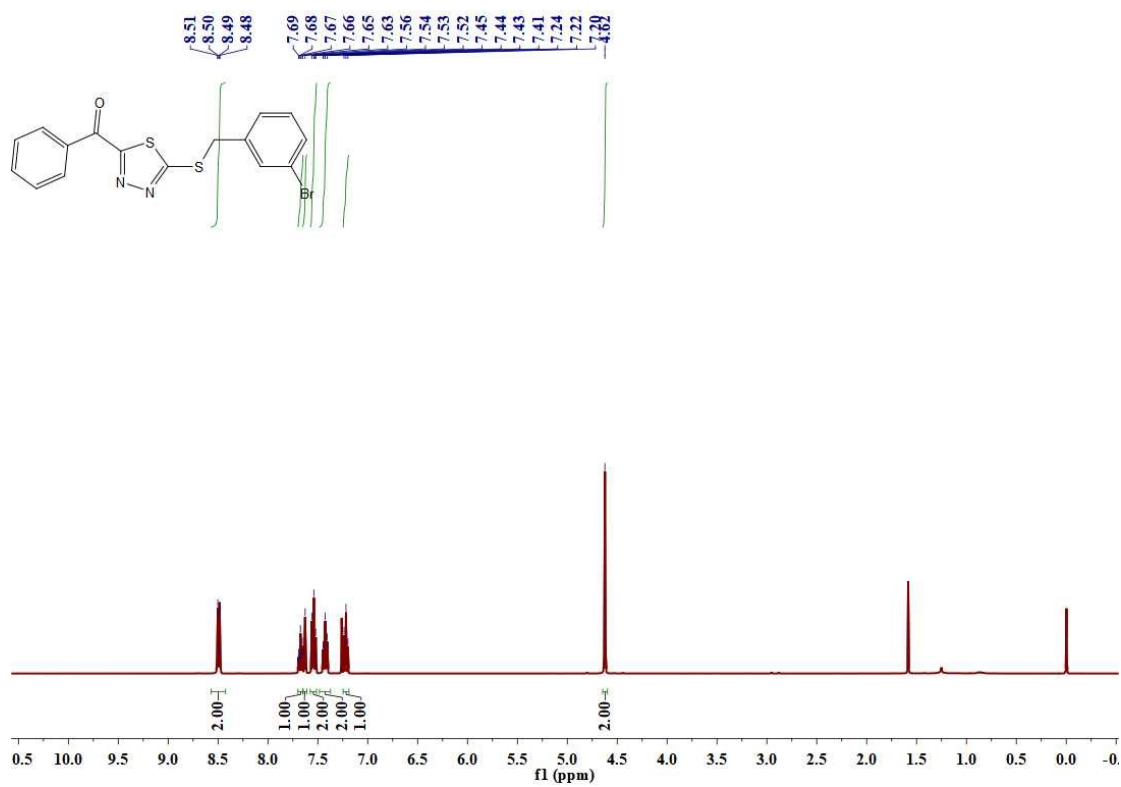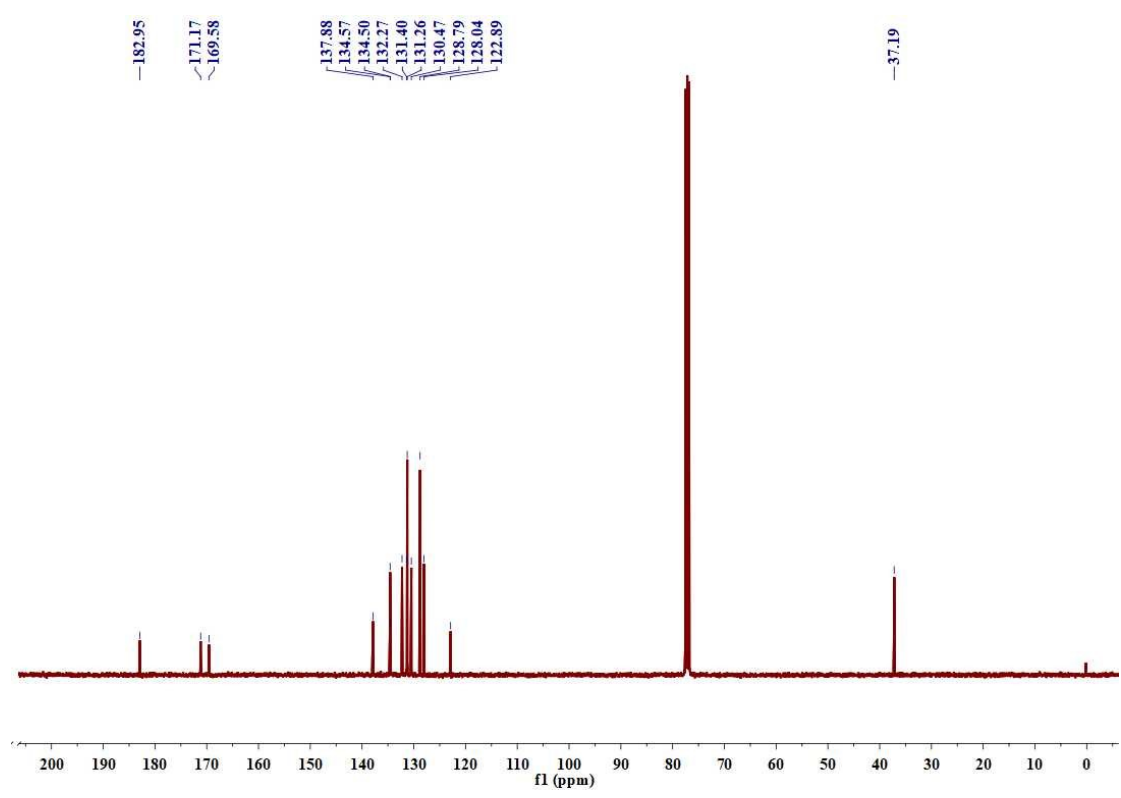



25 #63 RT: 0.65 AV: 1 NL: 4.38E+007  
T: FTMS + p ESI Full ms [120.0000-1800.0000]

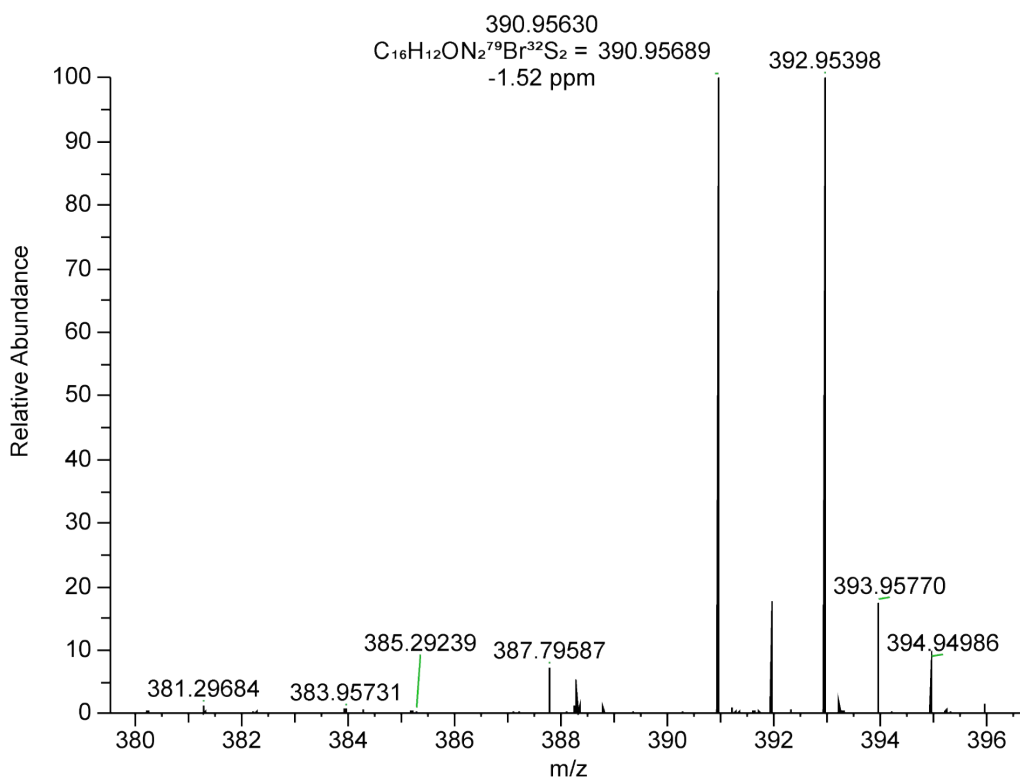

Figure S29.  $^1H$  NMR,  $^{13}C$  NMR and HRMS for **29**.

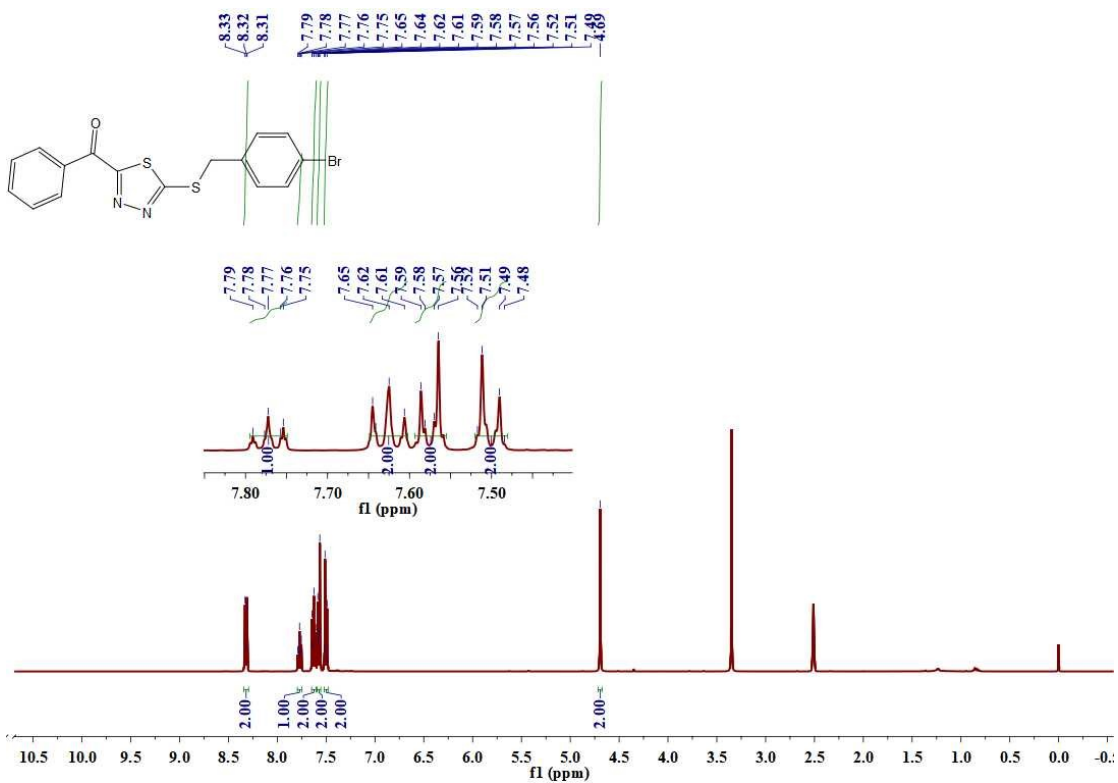

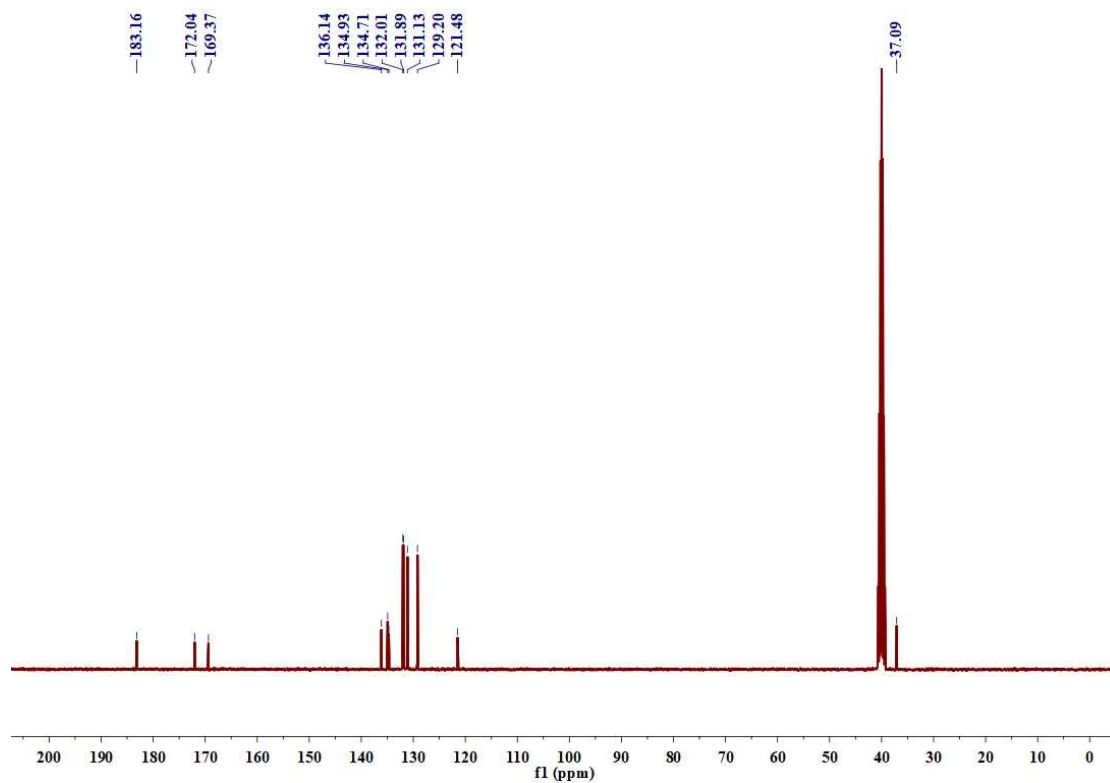

26 #71 RT: 0.72 AV: 1 NL: 2.14E+007  
 T: FTMS + p ESI Full ms [120.0000-1800.0000]

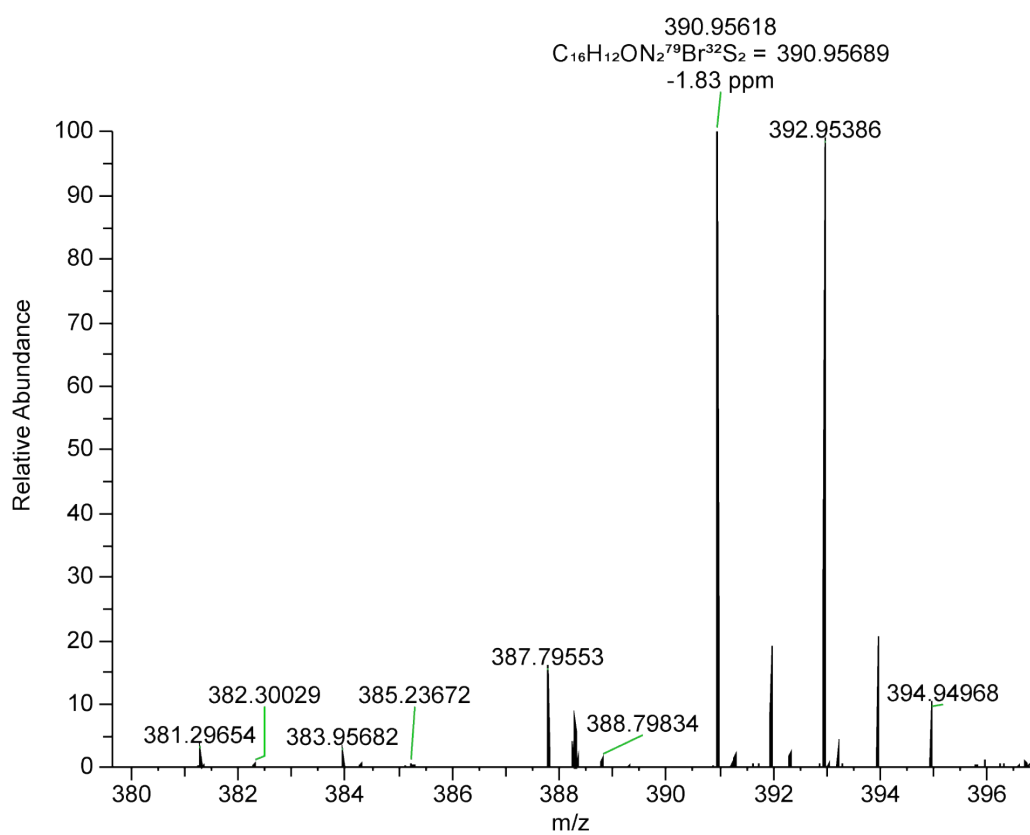

Figure S30.  $^1H$  NMR,  $^{13}C$  NMR and HRMS for E30.

### 3. Crystallographic data of compound E27

Table S1

Crystallographic data of compound E27

---

|                                  |                                                                  |
|----------------------------------|------------------------------------------------------------------|
| Empirical formula                | C <sub>16</sub> H <sub>11</sub> ClN <sub>2</sub> OS <sub>2</sub> |
| Formula weight                   | 346.84                                                           |
| Temperature/K                    | 273.15                                                           |
| Crystal system                   | triclinic                                                        |
| Space group                      | P-1                                                              |
| a/Å                              | 8.1736(4)                                                        |
| b/Å                              | 8.9413(4)                                                        |
| c/Å                              | 12.3309(6)                                                       |
| $\alpha$ /°                      | 105.112(2)                                                       |
| $\beta$ /°                       | 93.310(2)                                                        |
| $\gamma$ /°                      | 111.564(2)                                                       |
| Volume/Å <sup>3</sup>            | 797.19(7)                                                        |
| Z                                | 2                                                                |
| $\rho_{\text{calc}}/\text{cm}^3$ | 1.445                                                            |
| $\mu/\text{mm}^{-1}$             | 4.585                                                            |
| F(000)                           | 356.0                                                            |
| Crystal size/mm <sup>3</sup>     | 0.26 × 0.25 × 0.22                                               |
| Radiation                        | CuK $\alpha$ ( $\lambda$ = 1.54178)                              |

|                                                  |                                                               |
|--------------------------------------------------|---------------------------------------------------------------|
| 2 $\theta$ range for data collection/ $^{\circ}$ | 7.536 to 145.138                                              |
| Index ranges                                     | $-10 \leq h \leq 10, -11 \leq k \leq 11, -15 \leq l \leq 15$  |
| Reflections collected                            | 20086                                                         |
| Independent reflections                          | 3126 [ $R_{\text{int}} = 0.0672, R_{\text{sigma}} = 0.0427$ ] |
| Data/restraints/parameters                       | 3126/0/199                                                    |
| Goodness-of-fit on $F^2$                         | 1.119                                                         |
| Final R indexes [ $I \geq 2\sigma(I)$ ]          | $R_1 = 0.0953, wR_2 = 0.2294$                                 |
| Final R indexes [all data]                       | $R_1 = 0.0984, wR_2 = 0.2356$                                 |
| Largest diff. peak/hole / $e \text{ \AA}^{-3}$   | 0.81/-1.25                                                    |

#### 4. The regression equation of the title compounds with $EC_{50}$ values

**Table S2**

The regression equation of the partial title compounds, triadimefon and tebuconazole with  $EC_{50}$  values against

*Gibberella saubinetii* in vitro <sup>a</sup>

| Compound no.        | <i>G. saubinetii</i>           |                        |        |
|---------------------|--------------------------------|------------------------|--------|
|                     | $EC_{50}$ ( $\mu\text{g/mL}$ ) | Regression equation    | $R^2$  |
| <b>E1</b>           | 30.5 $\pm$ 1.4                 | $y = 1.2451x + 3.152$  | 0.970  |
| <b>E2</b>           | 21.9 $\pm$ 1.3                 | $y = 1.0181x + 3.6357$ | 0.988  |
| <b>E3</b>           | 21.5 $\pm$ 0.8                 | $y = 1.1504x + 3.4666$ | 0.892  |
| <b>triadimefon</b>  | 14.8 $\pm$ 0.5                 | $y = 1.3542x + 3.4166$ | 0.986  |
| <b>tebuconazole</b> | 0.4 $\pm$ 0.0                  | $y = 1.1883x + 5.4399$ | 0.9022 |

<sup>a</sup> Values are means  $\pm$  SD of three replicates.

**Table S3**

The regression equation of the partial title compounds, triadimefon and tebuconazole with EC<sub>50</sub> values against

*Verticillium dahliae* in vitro <sup>a</sup>

| Compound no.        | <i>V. dahliae</i>        |                      |                |
|---------------------|--------------------------|----------------------|----------------|
|                     | EC <sub>50</sub> (µg/mL) | Regression equation  | R <sup>2</sup> |
| <b>E1</b>           | 48.1±0.9                 | y = 2.2908x + 1.1459 | 0.987          |
| <b>E2</b>           | 45.4±0.9                 | y = 2.1678x + 1.4084 | 0.997          |
| <b>E3</b>           | 41.6±0.9                 | y = 2.04x + 1.6964   | 0.896          |
| <b>triadimefon</b>  | 2.9±0.2                  | y = 0.9237x + 4.567  | 0.834          |
| <b>tebuconazole</b> | 0.1±0.0                  | y = 1.3375x + 6.1905 | 0.9784         |

<sup>a</sup> Values are means ± SD of three replicates.

**Table S4**

The regression equation of the partial title compounds, triadimefon and tebuconazole with EC<sub>50</sub> values against

*Alternaria solani* in vitro <sup>a</sup>

| Compound no.        | <i>A. solani</i>         |                      |                |
|---------------------|--------------------------|----------------------|----------------|
|                     | EC <sub>50</sub> (µg/mL) | Regression equation  | R <sup>2</sup> |
| <b>E1</b>           | 61.7±2.0                 | y = 2.1879x + 1.0828 | 0.977          |
| <b>E2</b>           | 67.5±1.1                 | y = 2.369x + 0.6663  | 0.921          |
| <b>E3</b>           | 63.4±0.5                 | y = 1.4069x + 2.4651 | 0.978          |
| <b>triadimefon</b>  | 45.3±0.6                 | y = 0.8472x + 3.5972 | 0.992          |
| <b>tebuconazole</b> | 1.3±0.0                  | y = 1.4719x + 4.8591 | 0.9746         |

<sup>a</sup> Values are means ± SD of three replicates.

**Table S5**

The regression equation of the partial title compounds, triadimefon and tebuconazole with EC<sub>50</sub> values against *Gibberella zeae* in vitro <sup>a</sup>

| Compound no.        | <i>G. zeae</i>           |                      |                |
|---------------------|--------------------------|----------------------|----------------|
|                     | EC <sub>50</sub> (µg/mL) | Regression equation  | R <sup>2</sup> |
| <b>E1</b>           | 59.8±0.5                 | y = 2.2502x + 1.0022 | 0.972          |
| <b>E2</b>           | 42.8±0.4                 | y = 1.4554x + 2.6256 | 0.969          |
| <b>E3</b>           | 37.3±0.9                 | y = 1.144x + 3.2018  | 0.938          |
| <b>triadimefon</b>  | 16.9±0.1                 | y = 1.0026x + 3.7695 | 0.988          |
| <b>tebuconazole</b> | 0.4±0.0                  | y = 1.6445x + 5.5957 | 0.9966         |

<sup>a</sup> Values are means ± SD of three replicates.

**Table S6**

The regression equation of the partial title compounds, triadimefon and tebuconazole with EC<sub>50</sub> values against *Thanatephorus cucumeris* in vitro <sup>a</sup>

| Compound no.        | <i>T. cucumeris</i>      |                      |                |
|---------------------|--------------------------|----------------------|----------------|
|                     | EC <sub>50</sub> (µg/mL) | Regression equation  | R <sup>2</sup> |
| <b>E1</b>           | 32.8±1.3                 | y = 2.176x + 1.7021  | 0.975          |
| <b>E2</b>           | 22.2±0.7                 | y = 1.9322x + 2.3989 | 0.971          |
| <b>E3</b>           | 39.6±1.3                 | y = 1.6096x + 2.4282 | 0.994          |
| <b>triadimefon</b>  | 11.0±0.7                 | y = 0.8934x + 4.0703 | 0.990          |
| <b>tebuconazole</b> | 0.6±0.1                  | y = 1.184x + 5.2672  | 0.9941         |

<sup>a</sup> Values are means ± SD of three replicates.
